# Supplementary material
Source: PubMed Central journal article supplement (PMC3861882)

## Supporting Information

# Batch and Flow Photochemical Benzannulations Based on the Reaction of Ynamides and Diazo Ketones. Application to the Synthesis of Polycyclic Aromatic and Heteroaromatic Compounds

Thomas P. Willumstad, Olesya Haze, Xiao Yin Mak, Tin Yiu Lam, Yu-Pu Wang,  
and Rick L. Danheiser\*

*Department of Chemistry  
Massachusetts Institute of Technology  
Cambridge, Massachusetts 02139*

E-mail: danheisr@mit.edu

## Table of Contents

|                                                  |        |
|--------------------------------------------------|--------|
| Rate Study of Ynamide Reactivity                 | S2-S4  |
| $^1\text{H}$ NMR and $^{13}\text{C}$ NMR Spectra | S5-S52 |

## Rate Study of Ynamide Reactivity

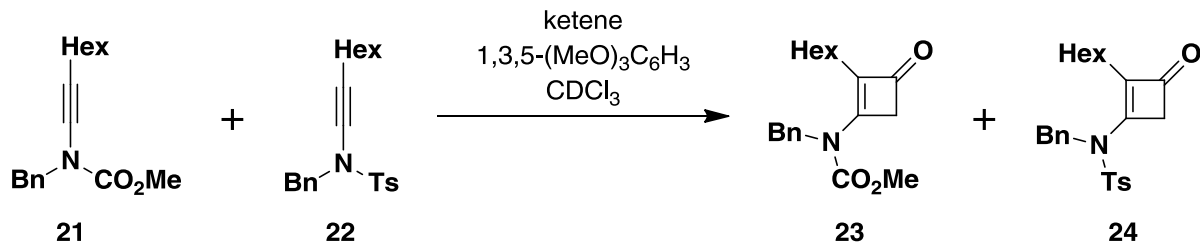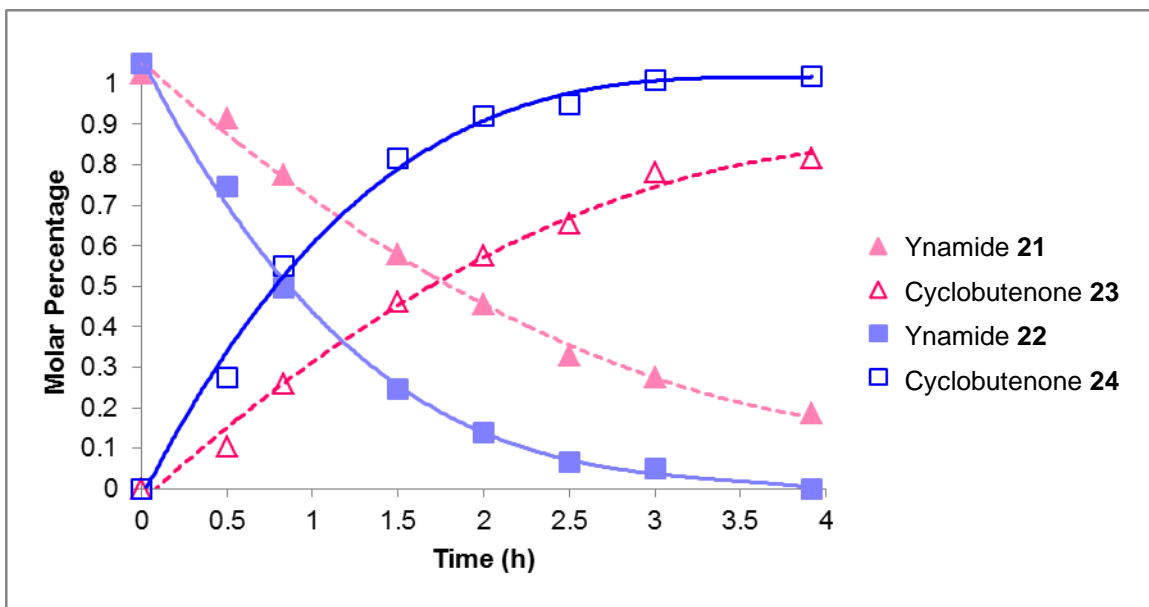

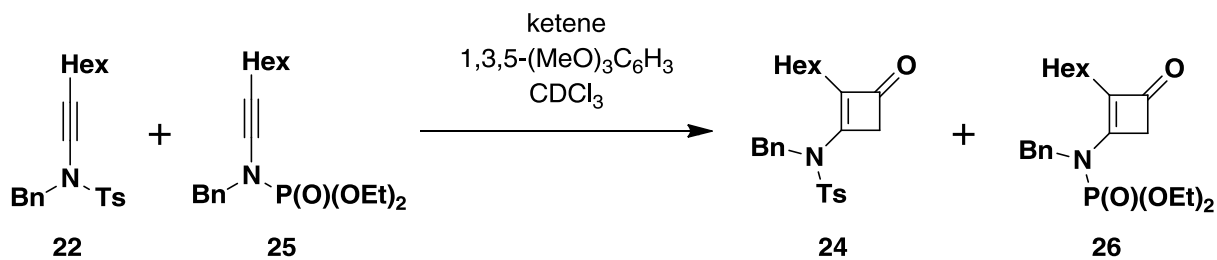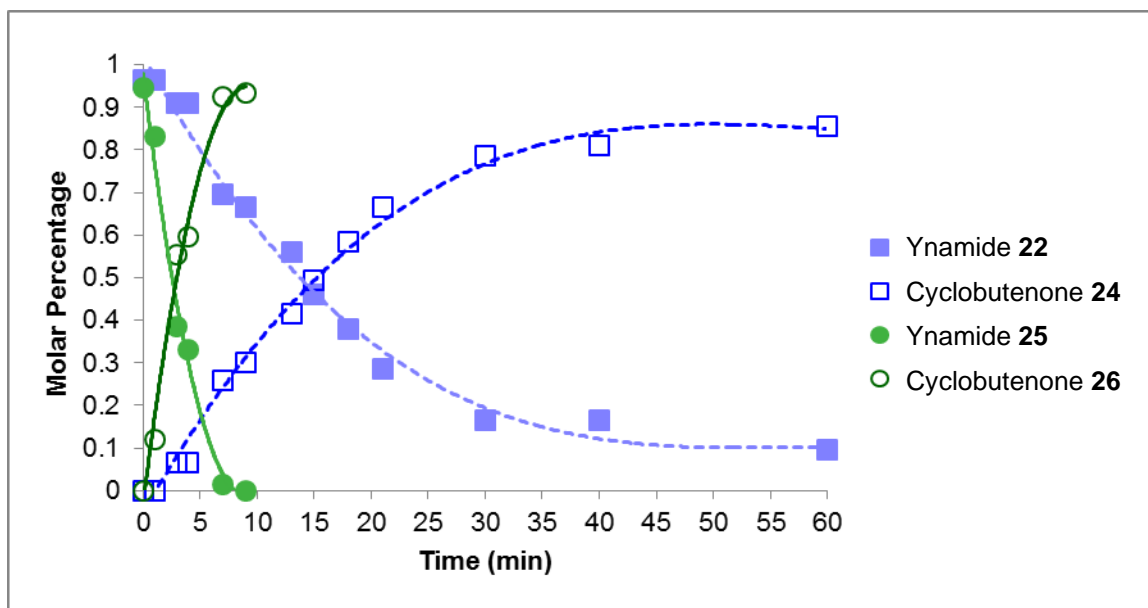

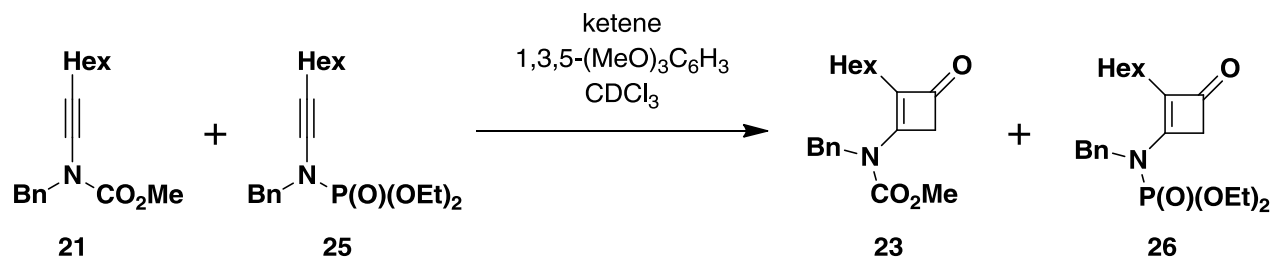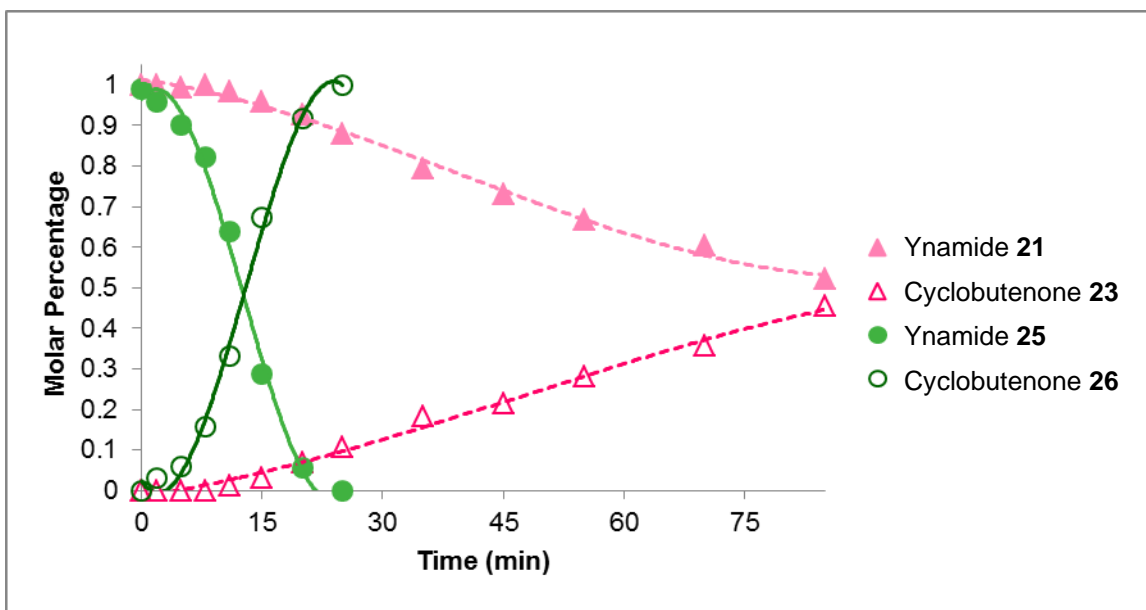

## $^1\text{H}$ NMR and $^{13}\text{C}$ NMR Spectra

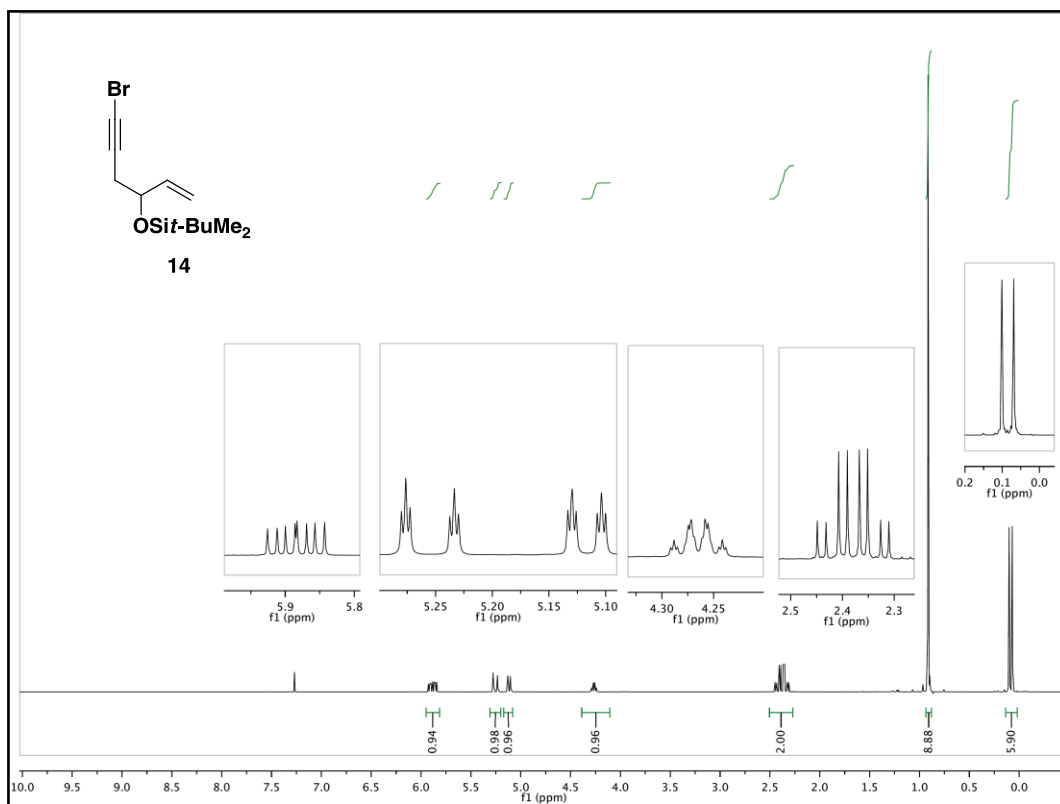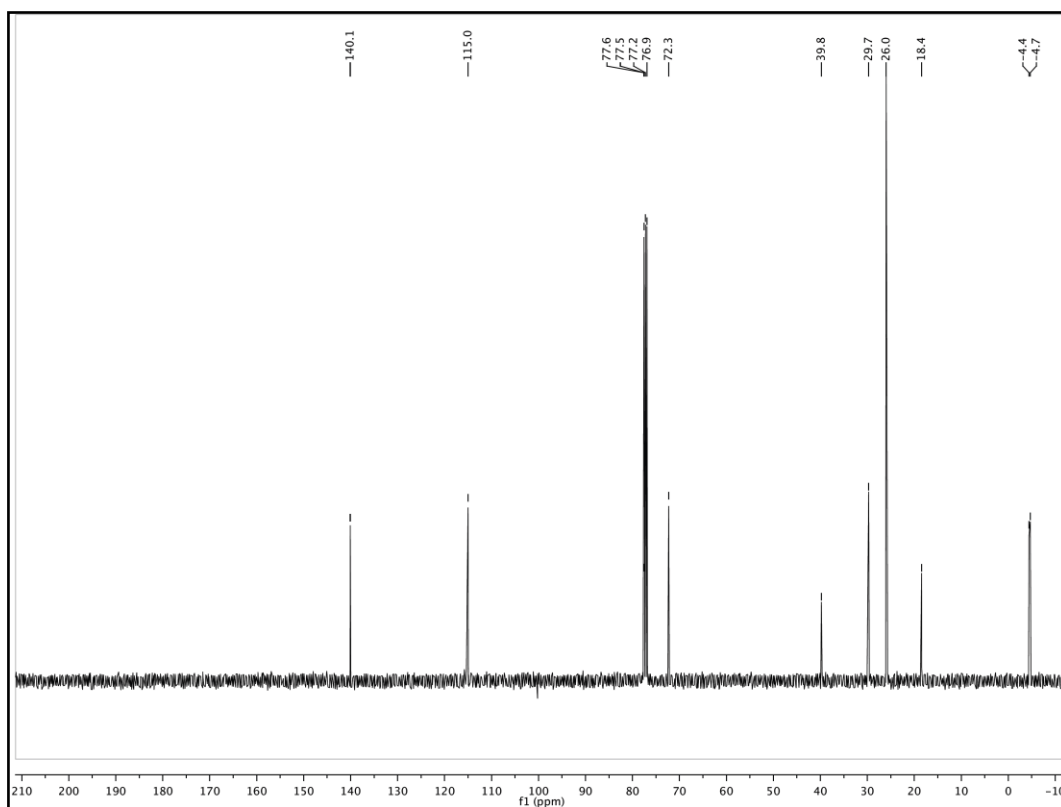

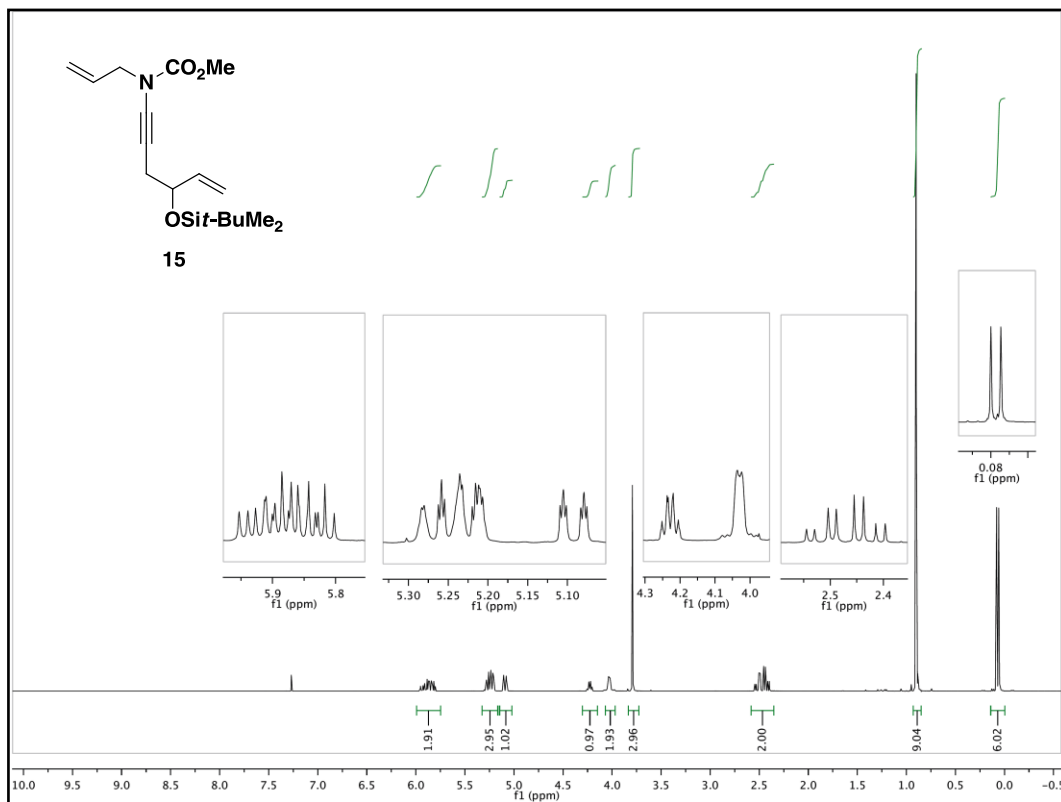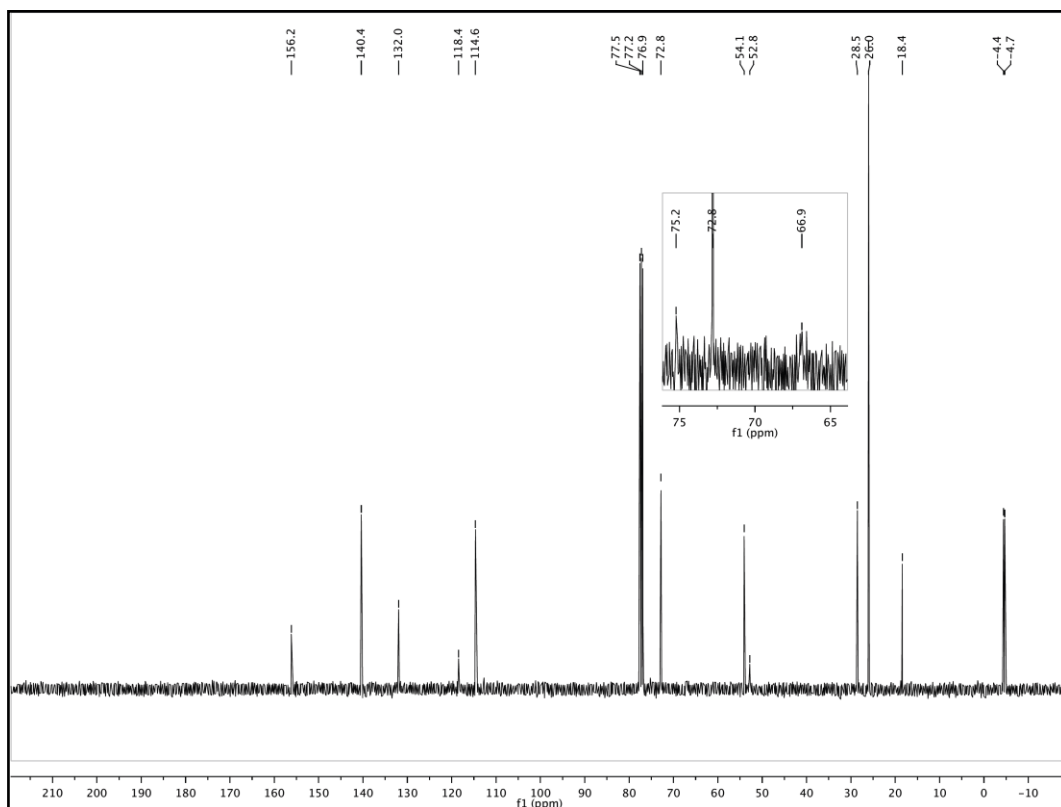

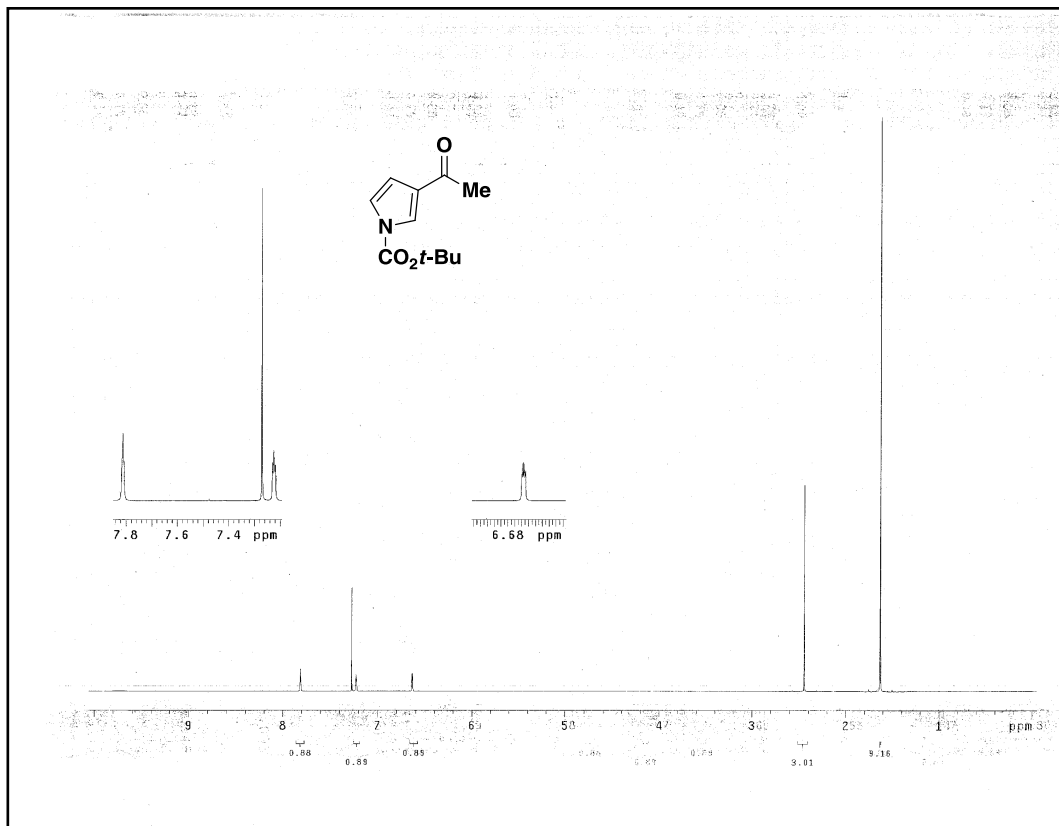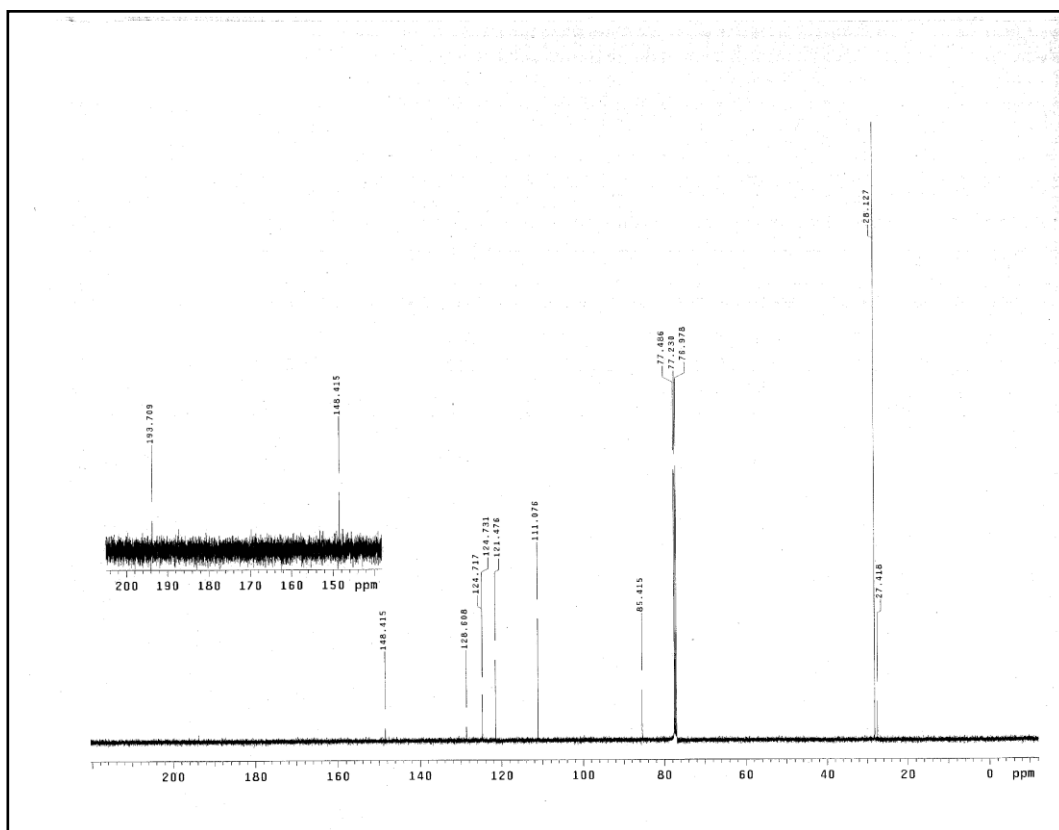

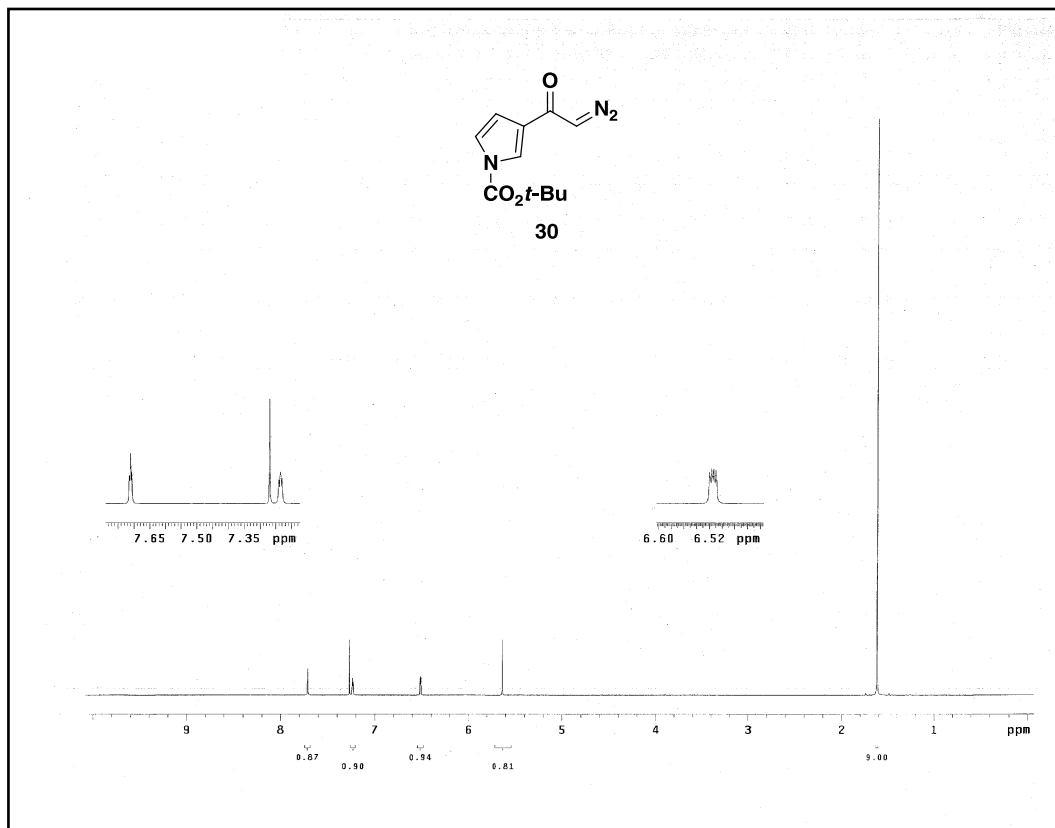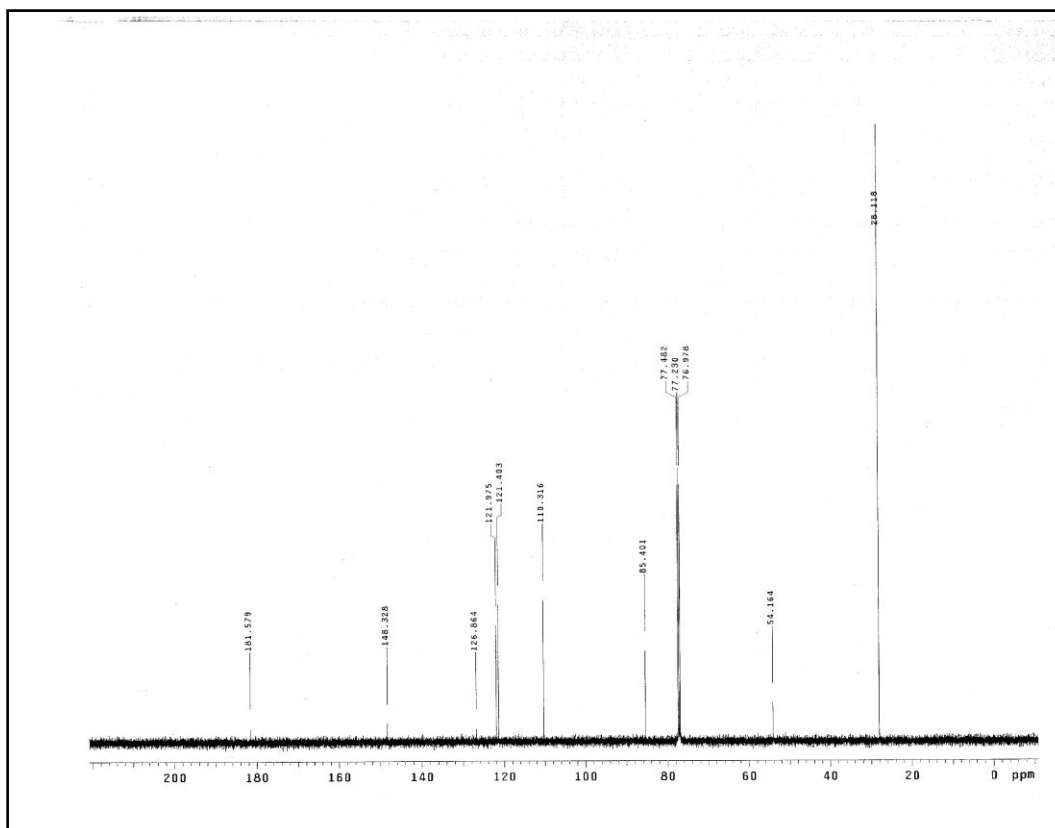



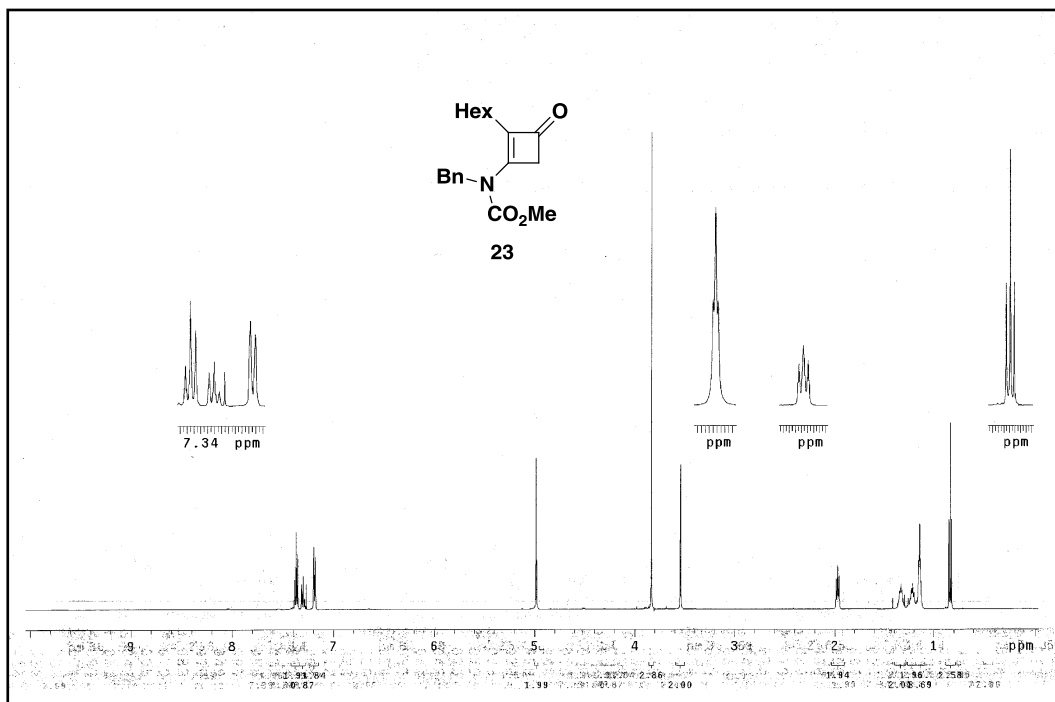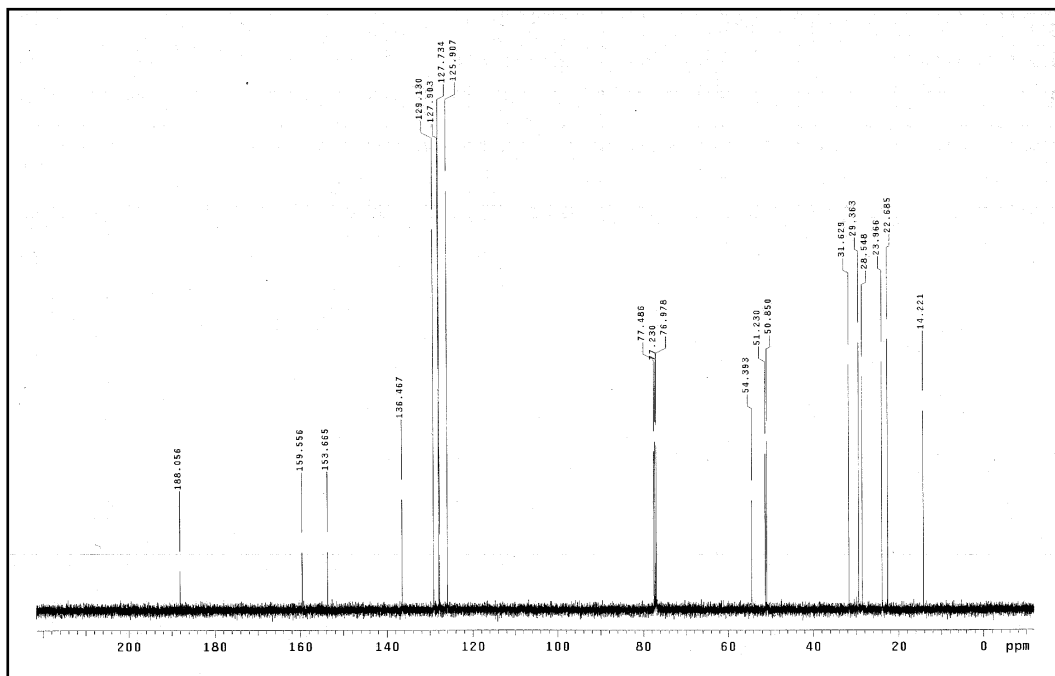

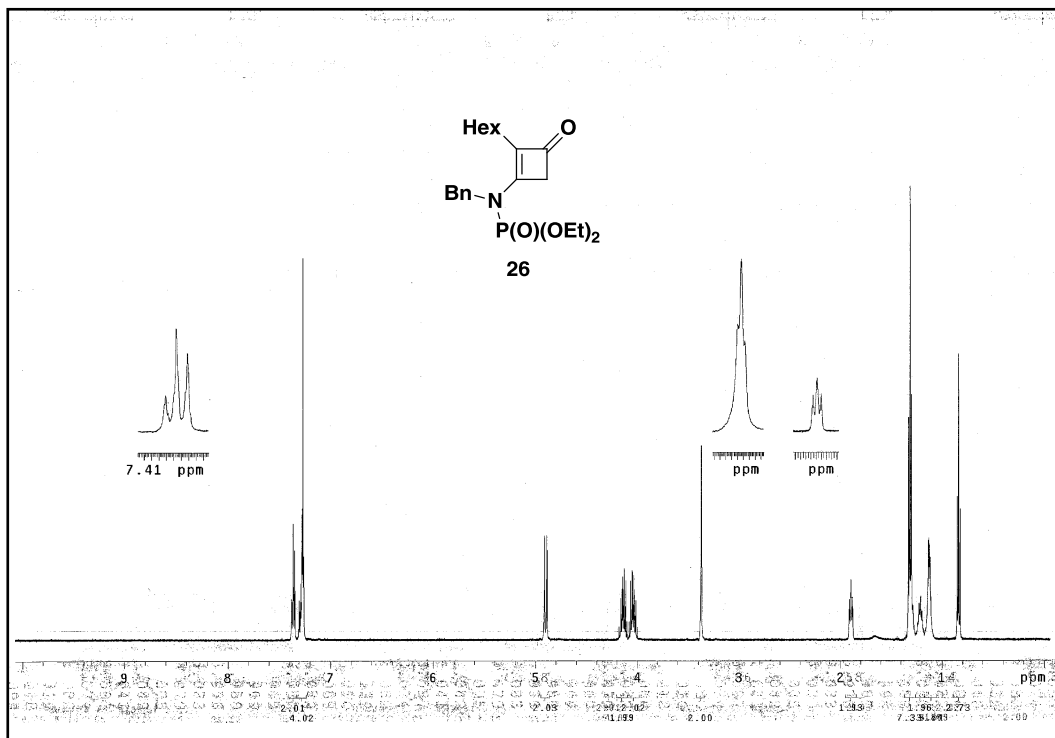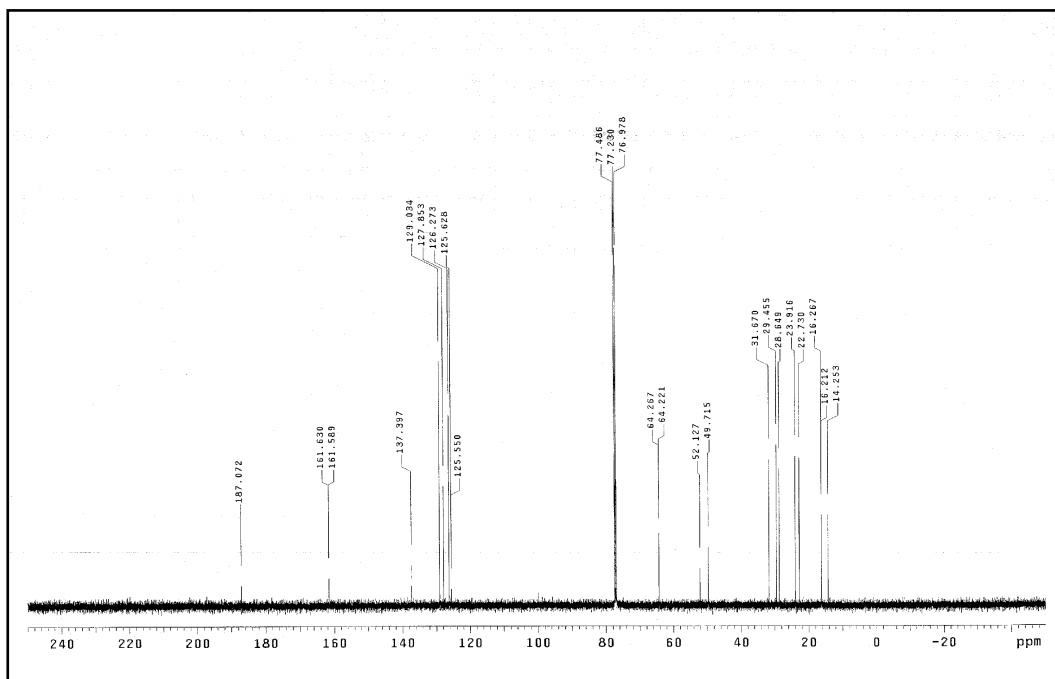

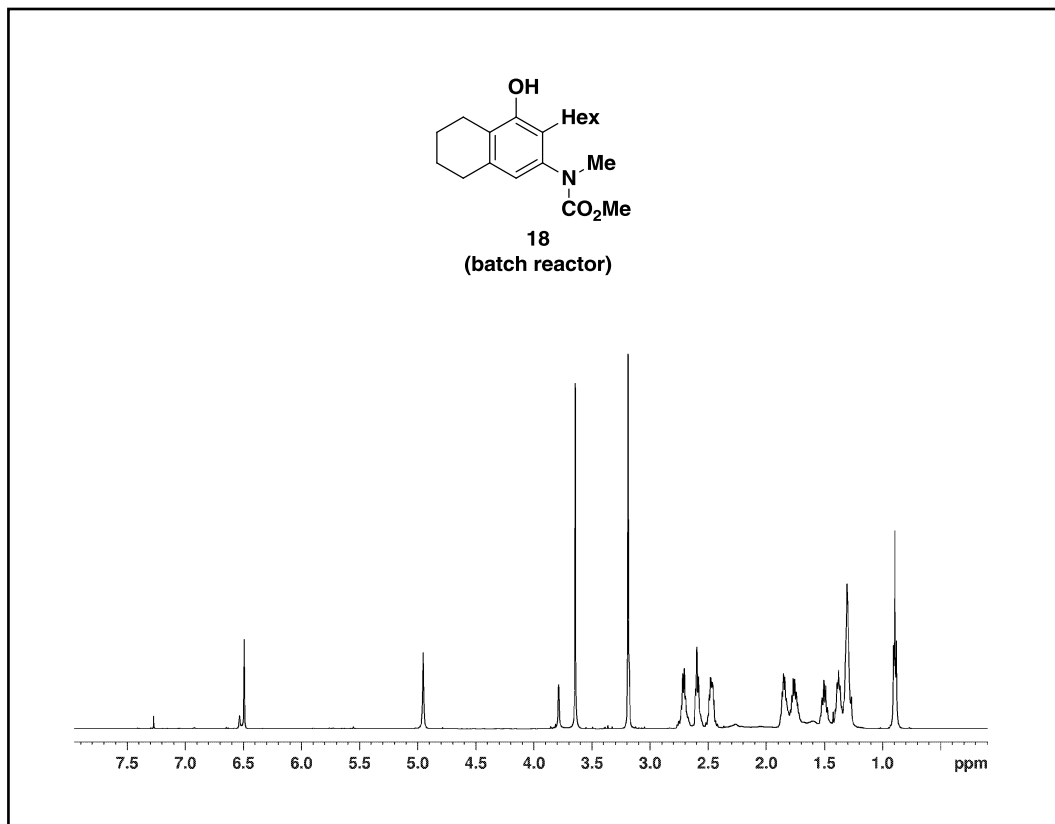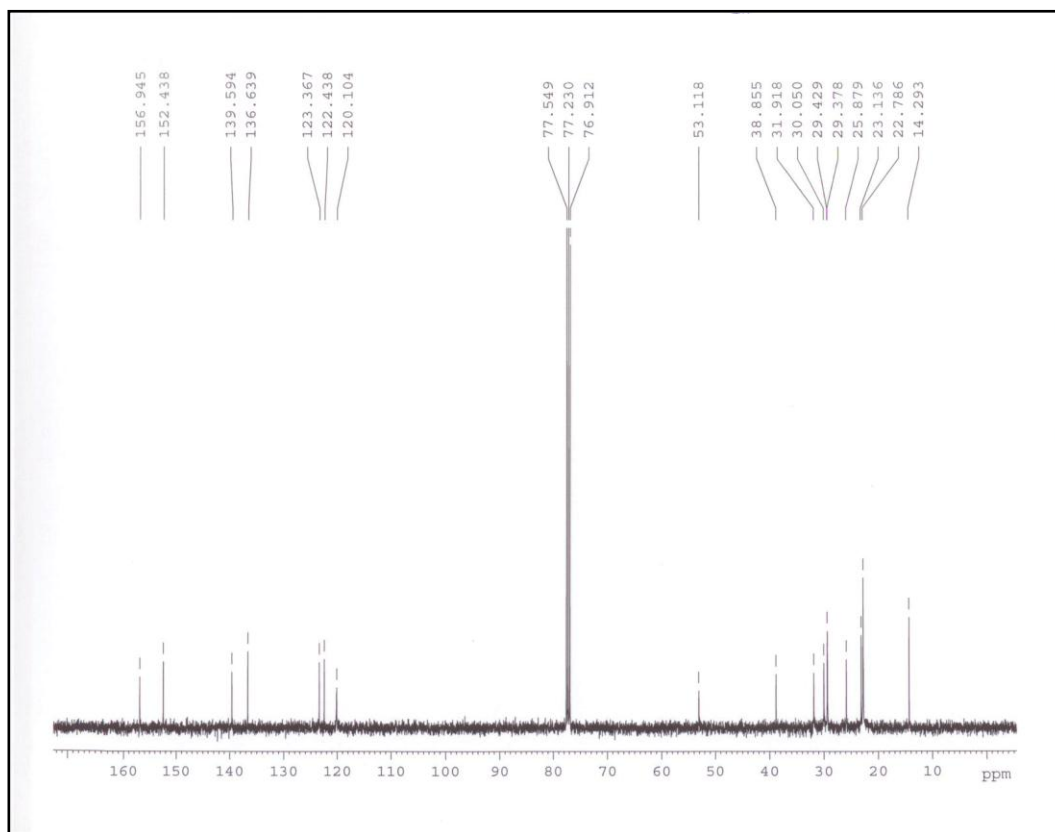

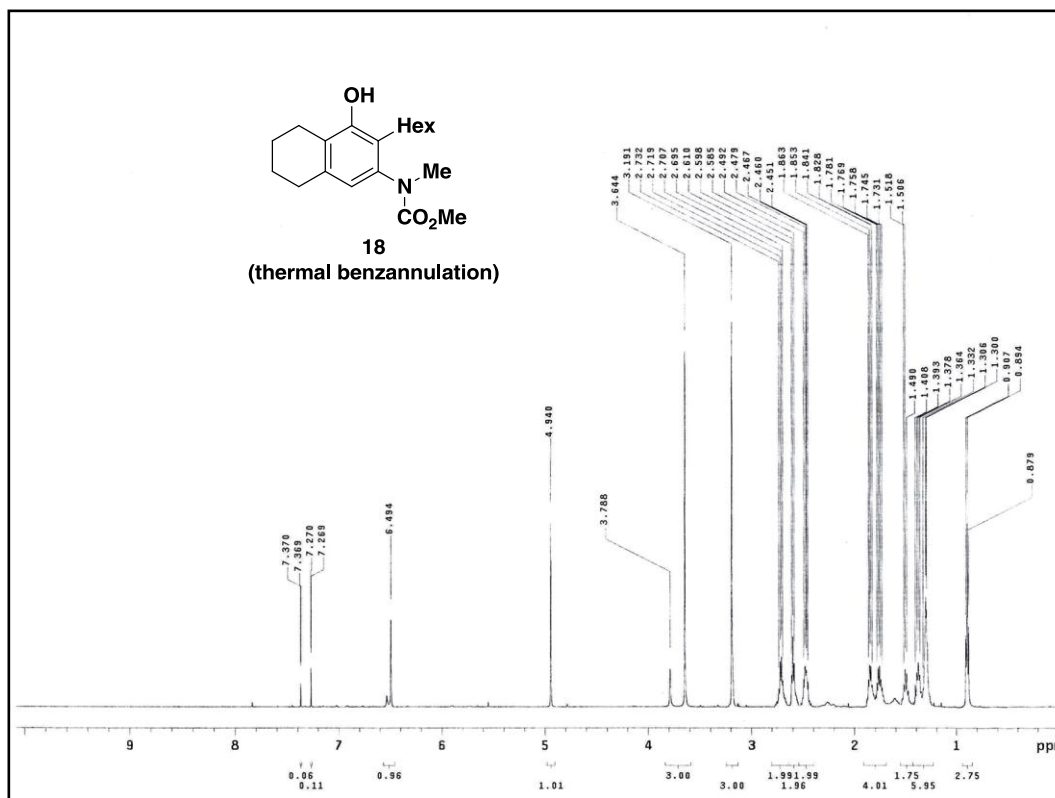

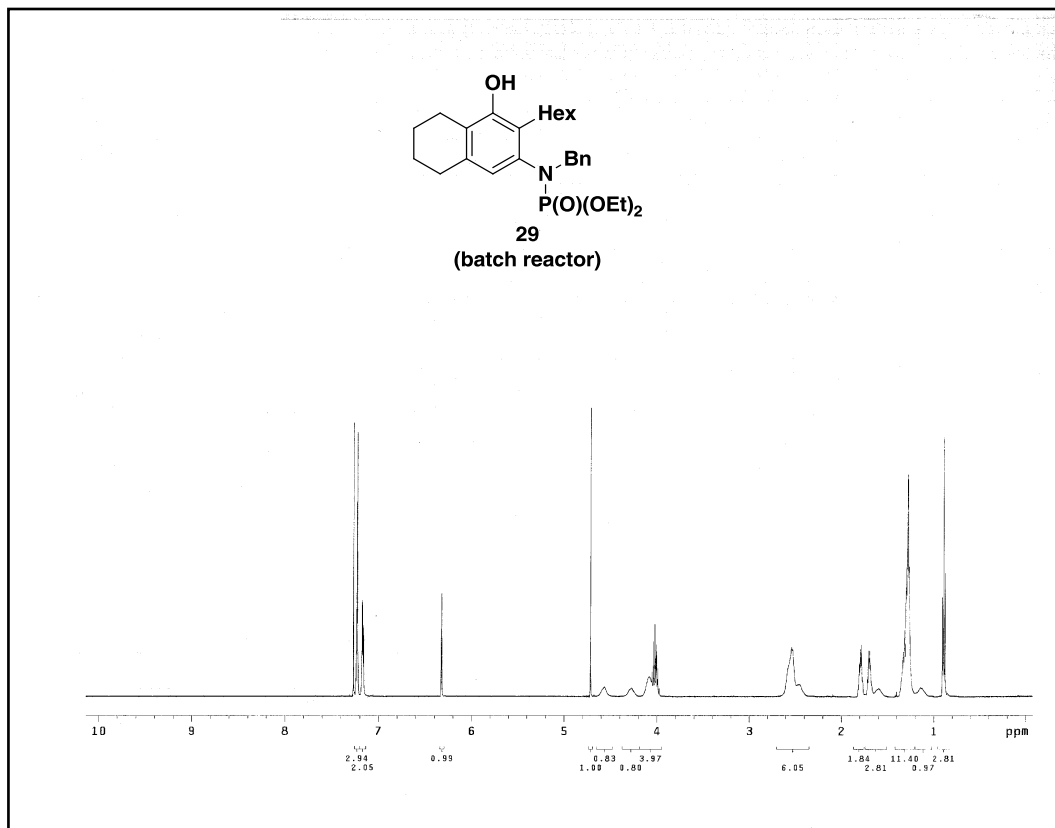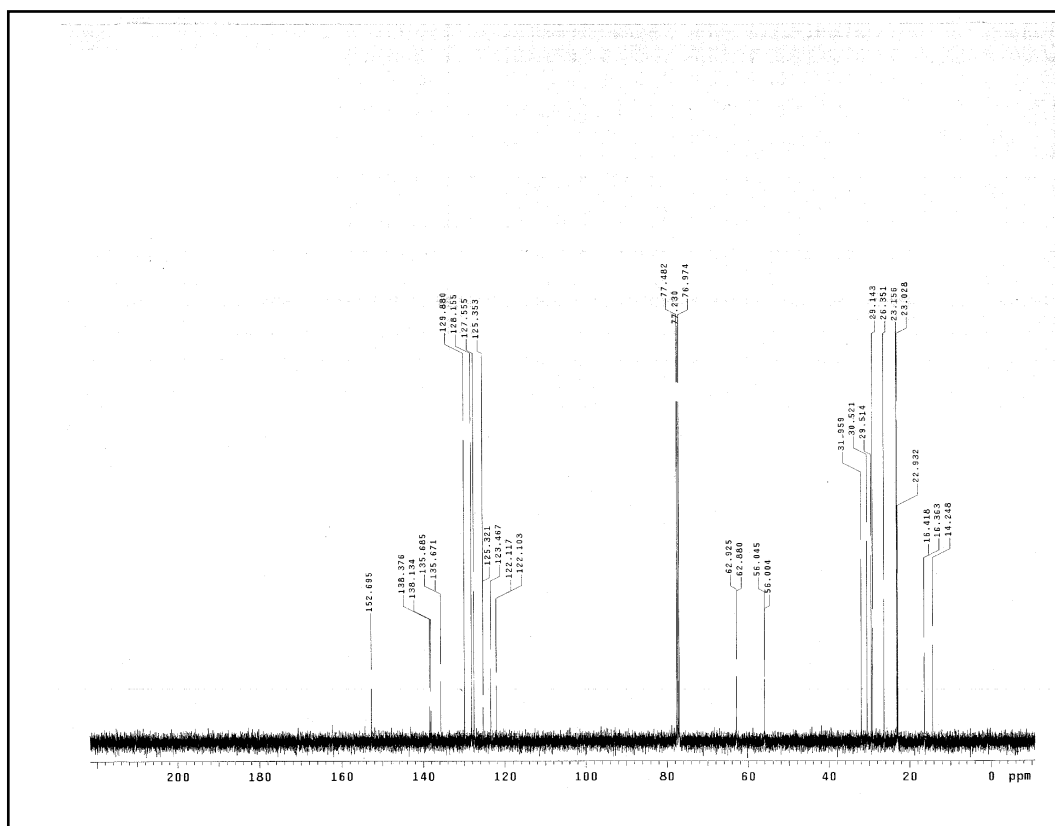

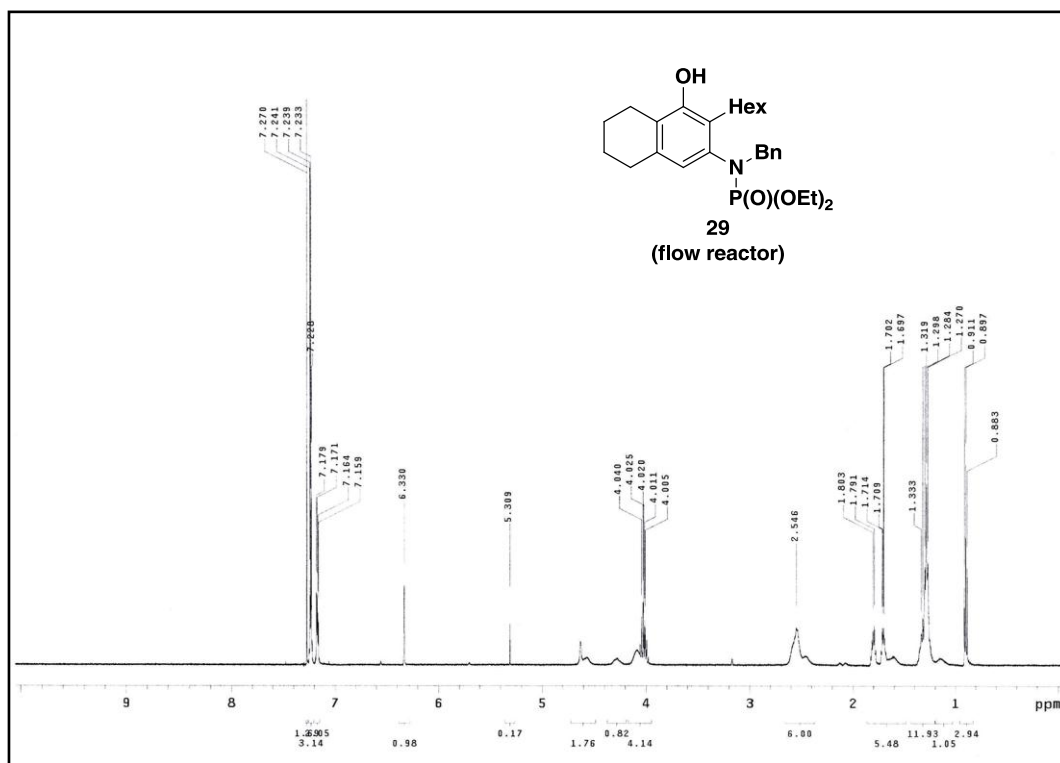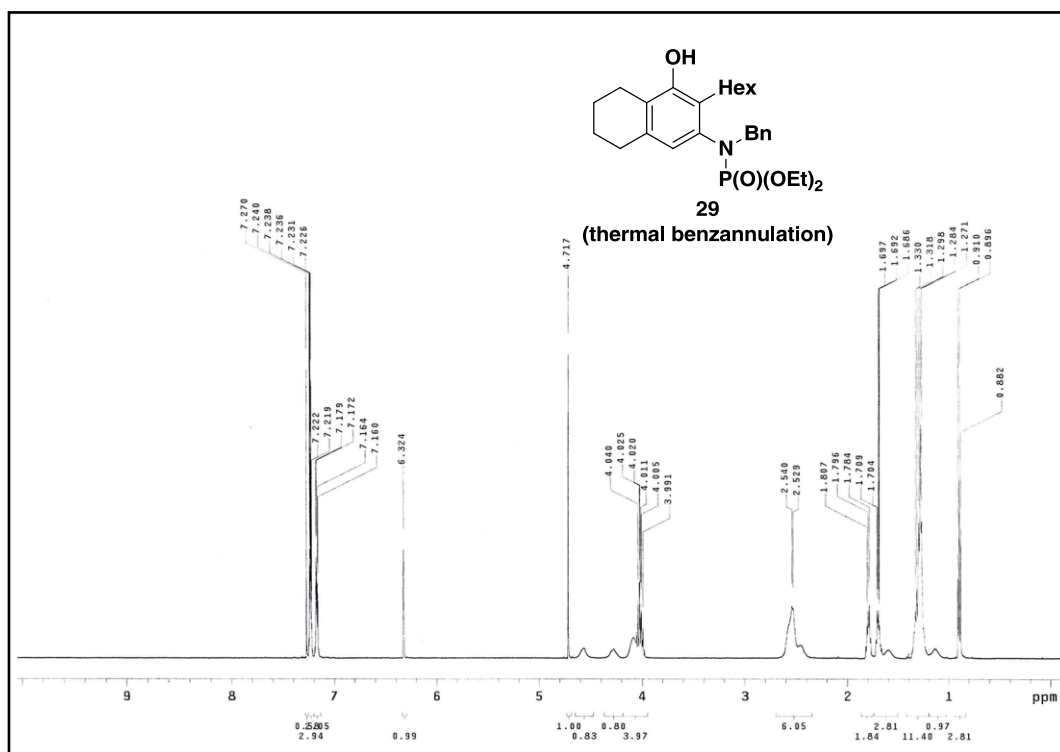

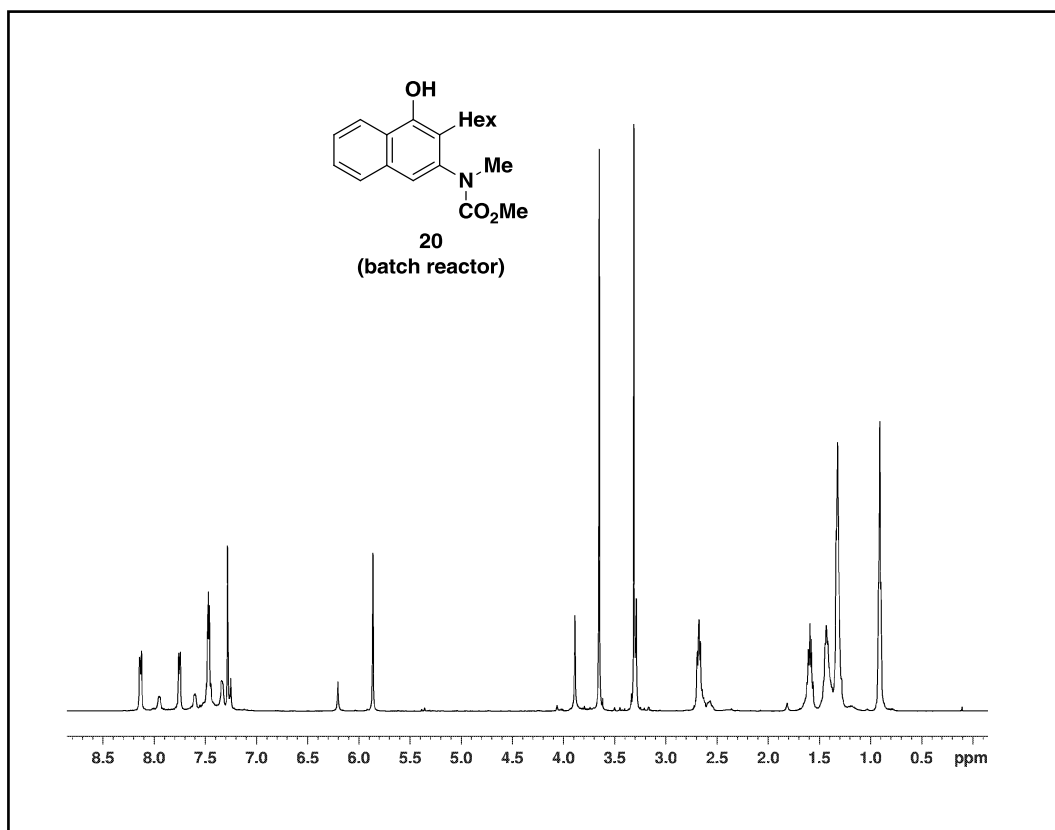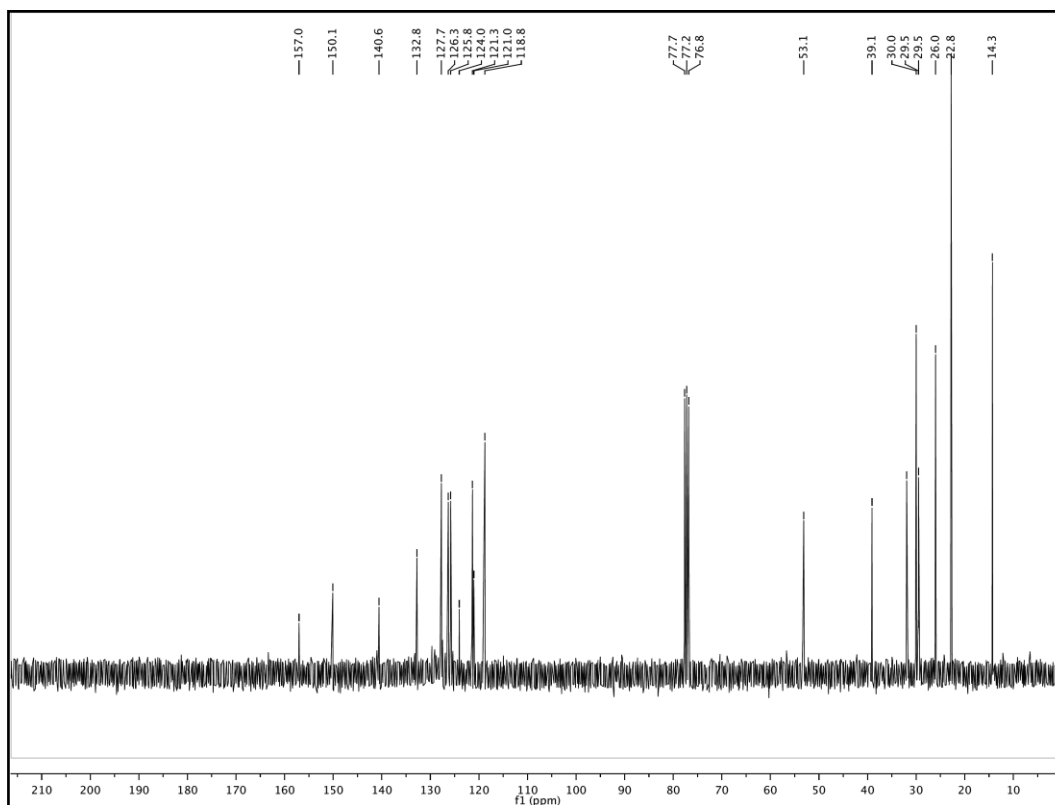

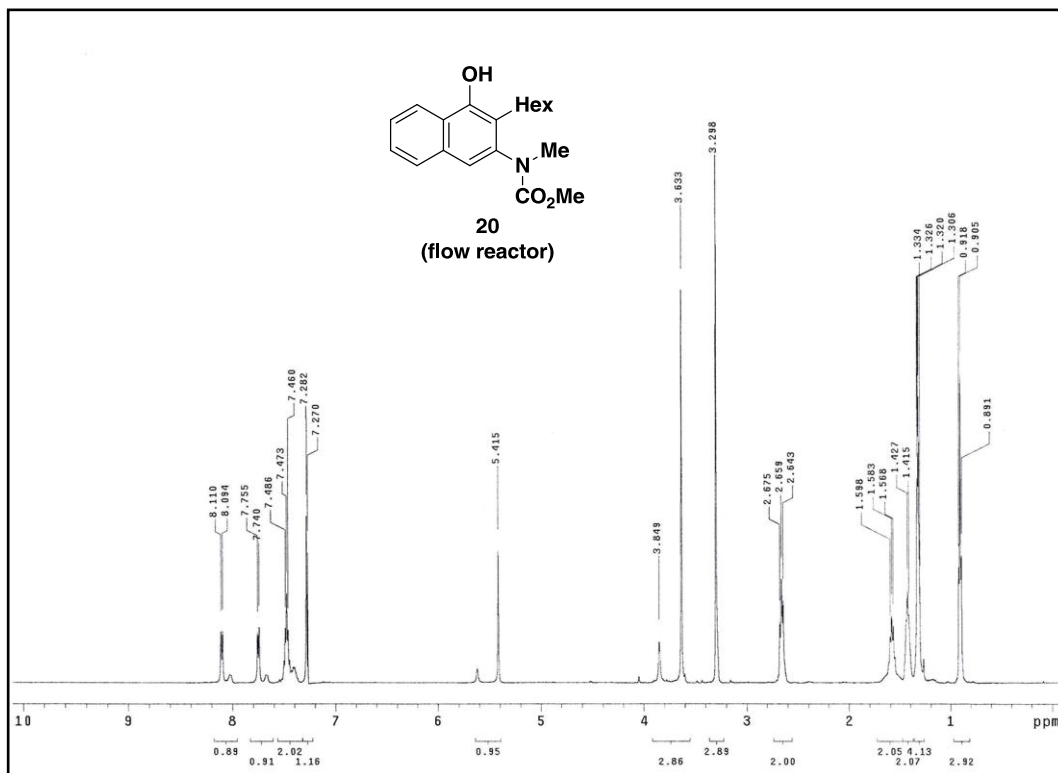



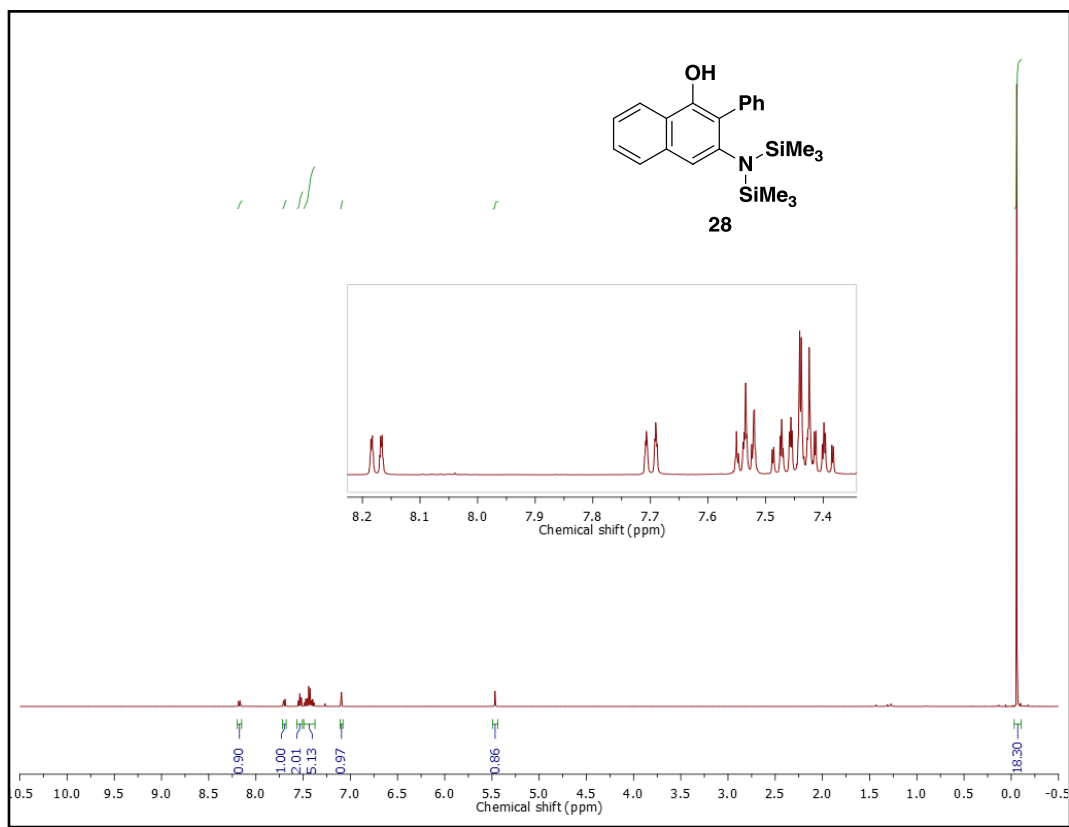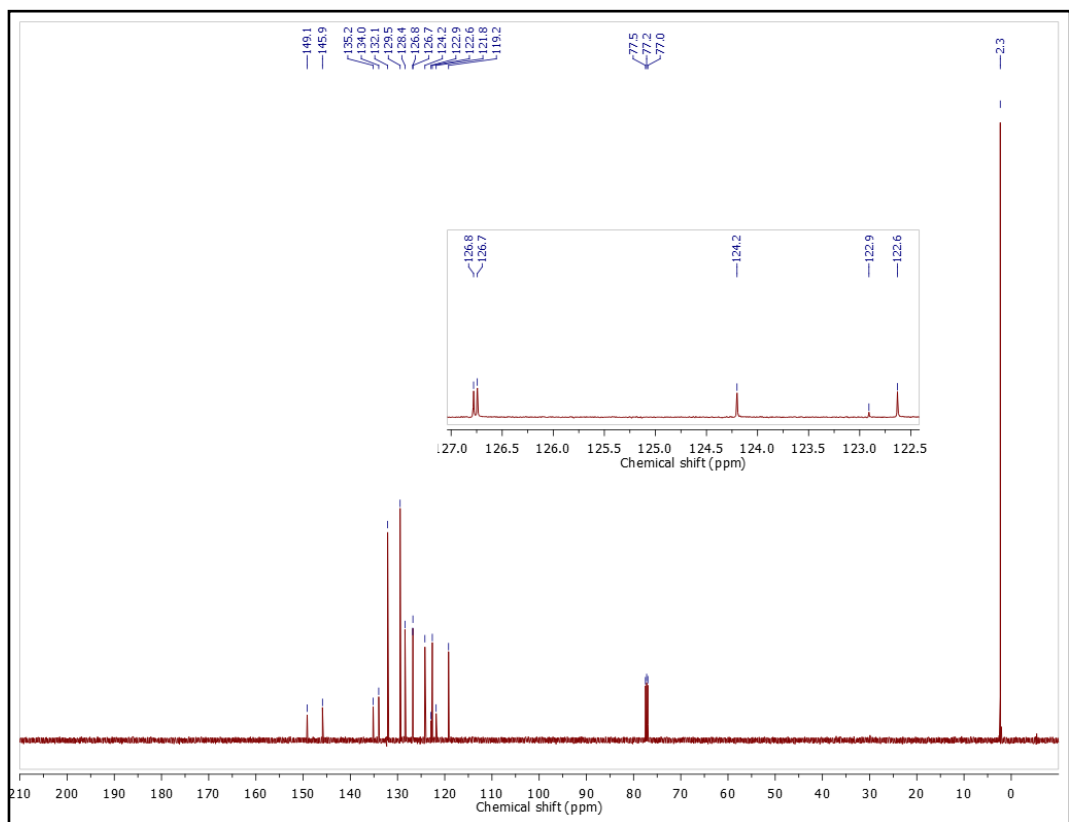

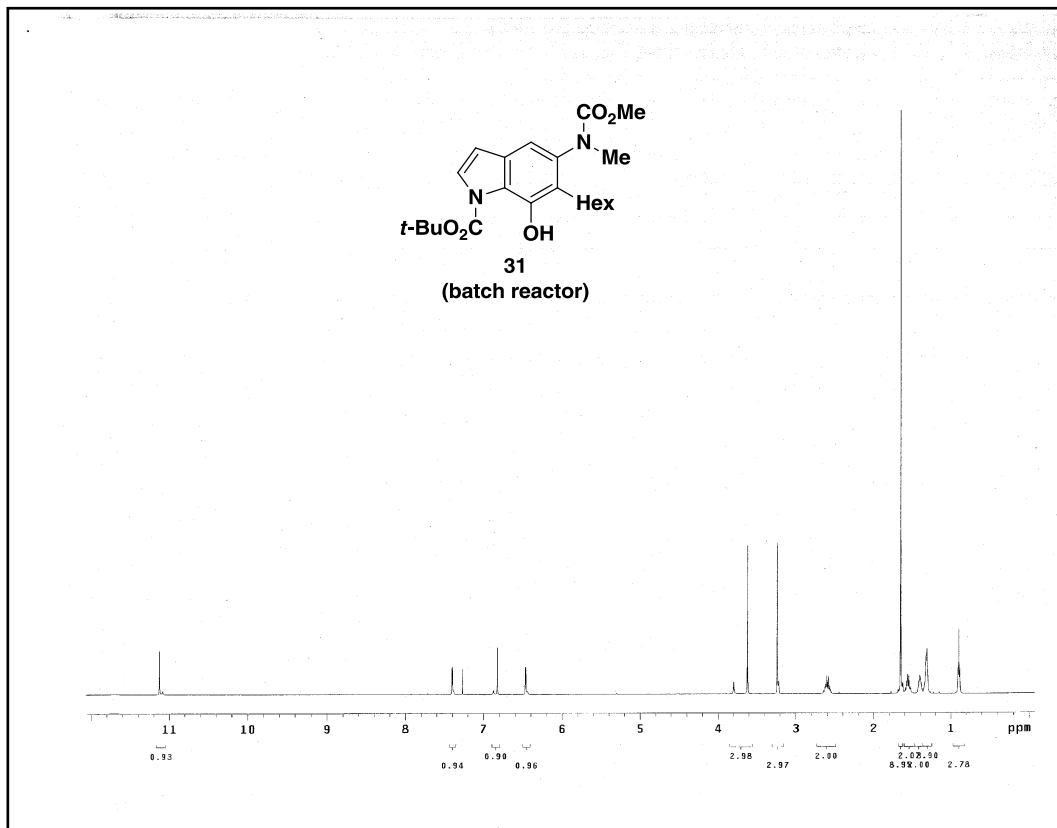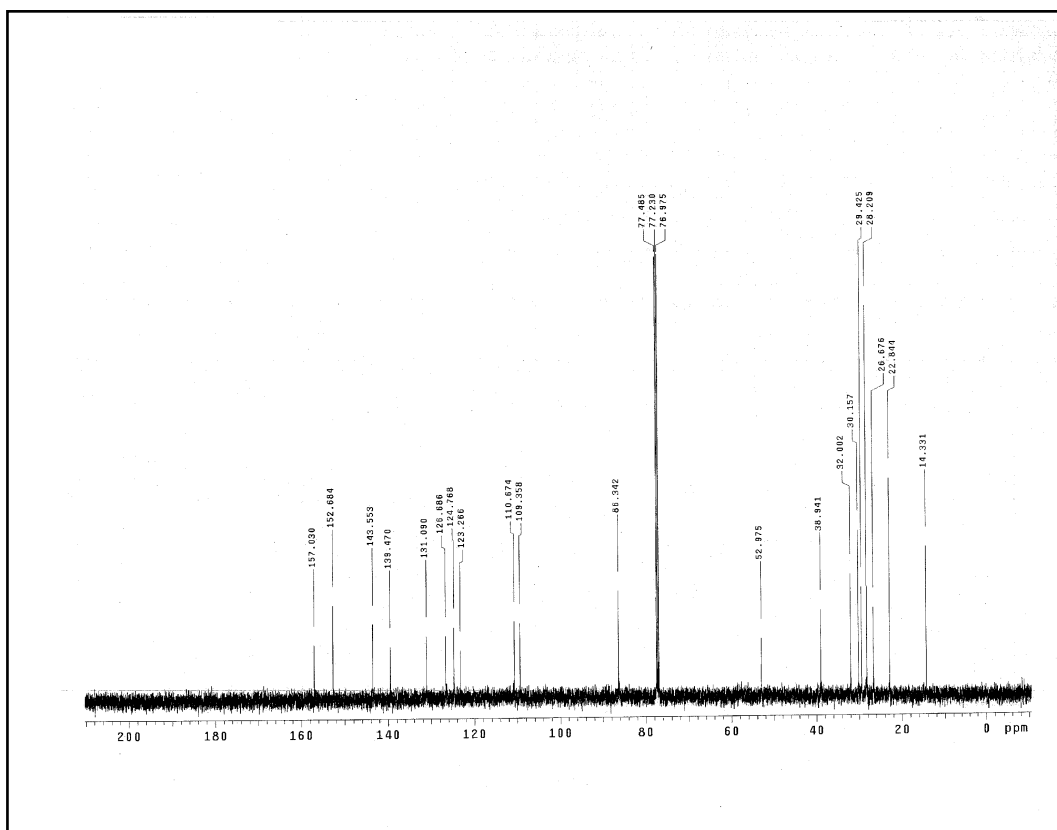

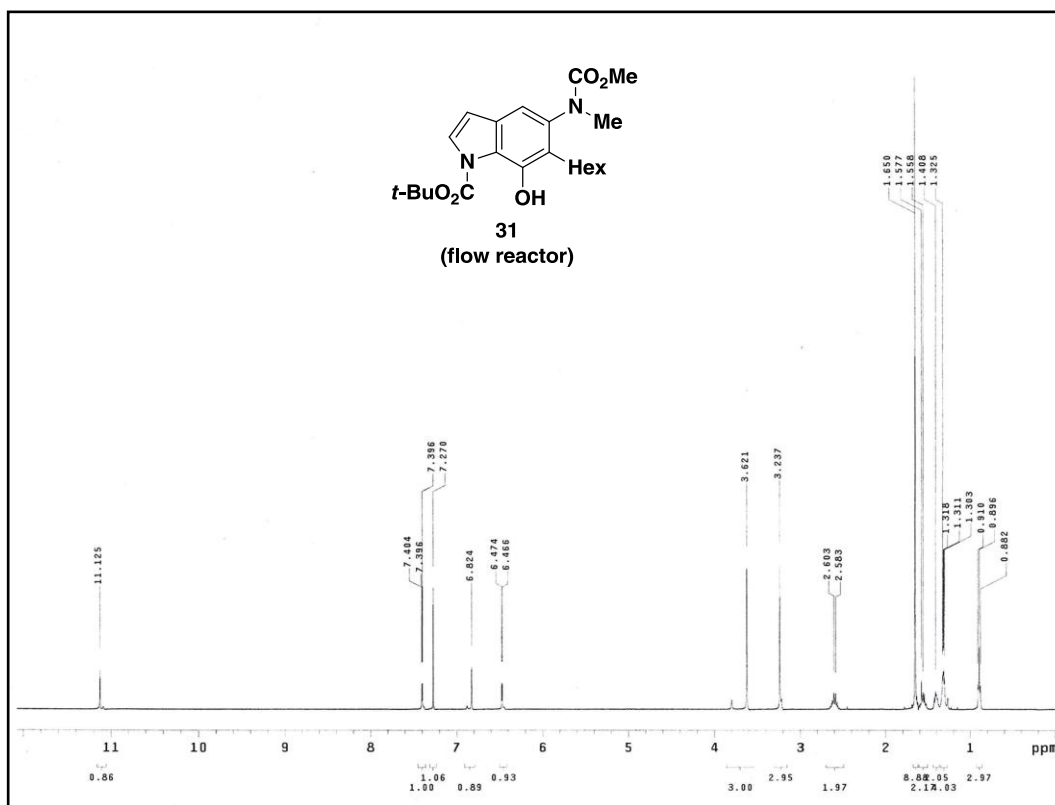

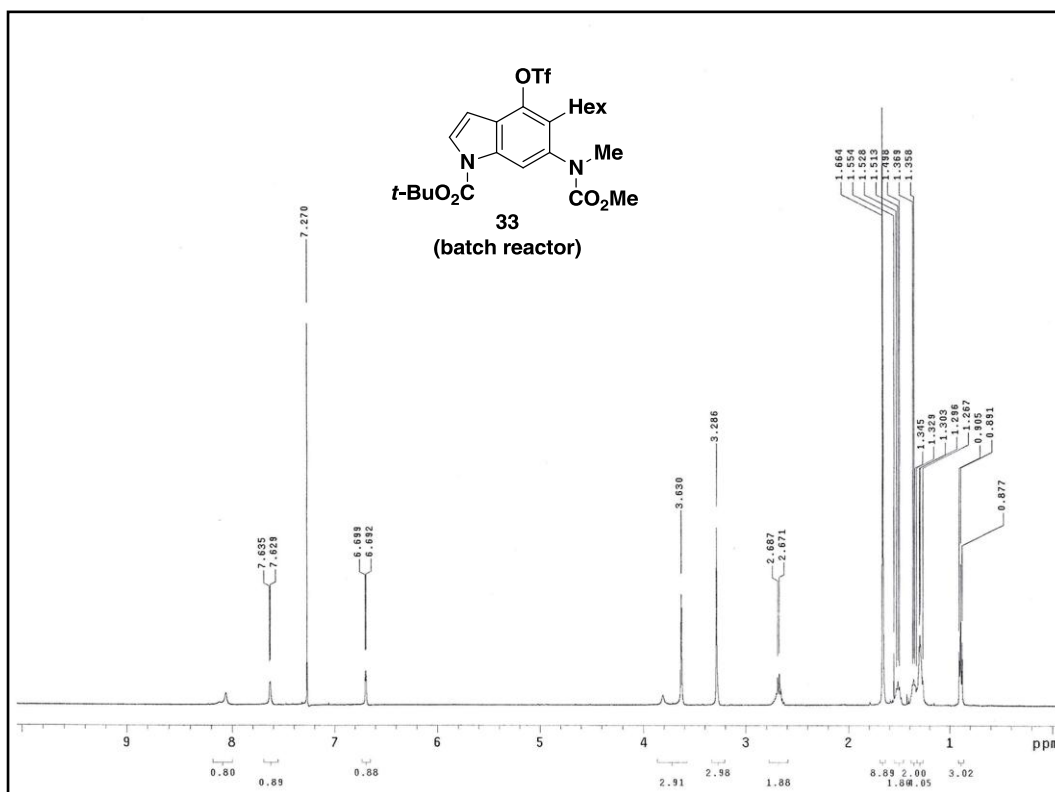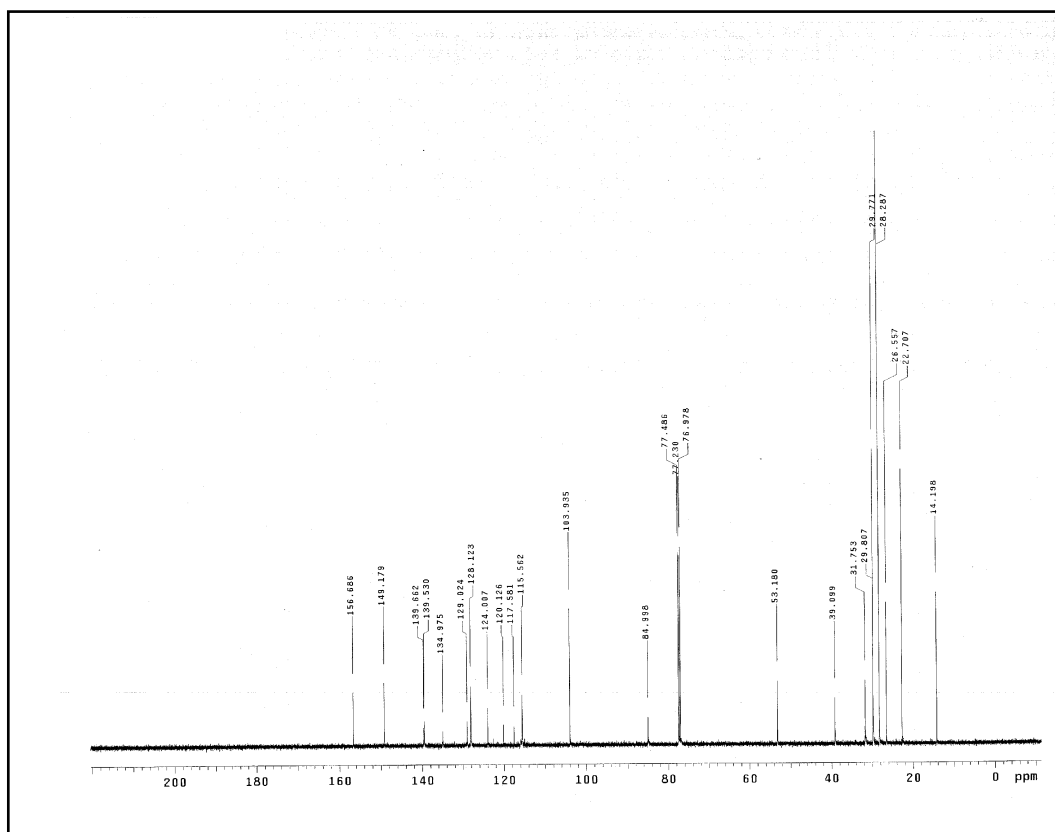

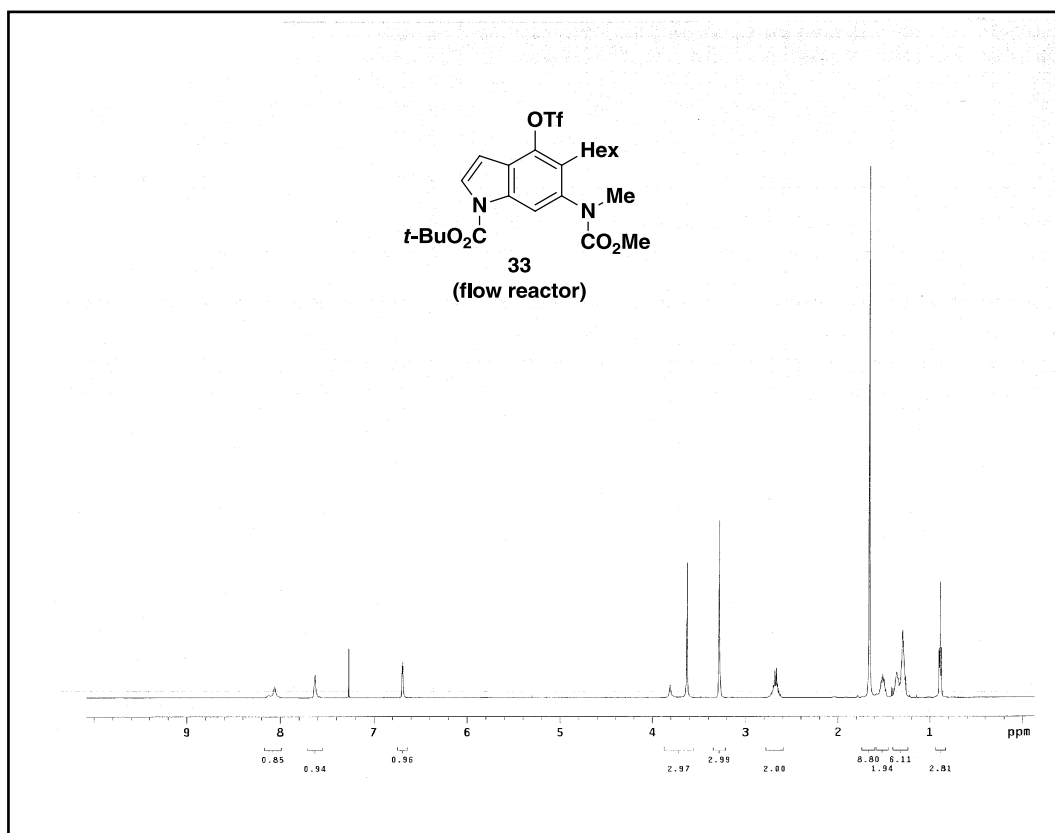

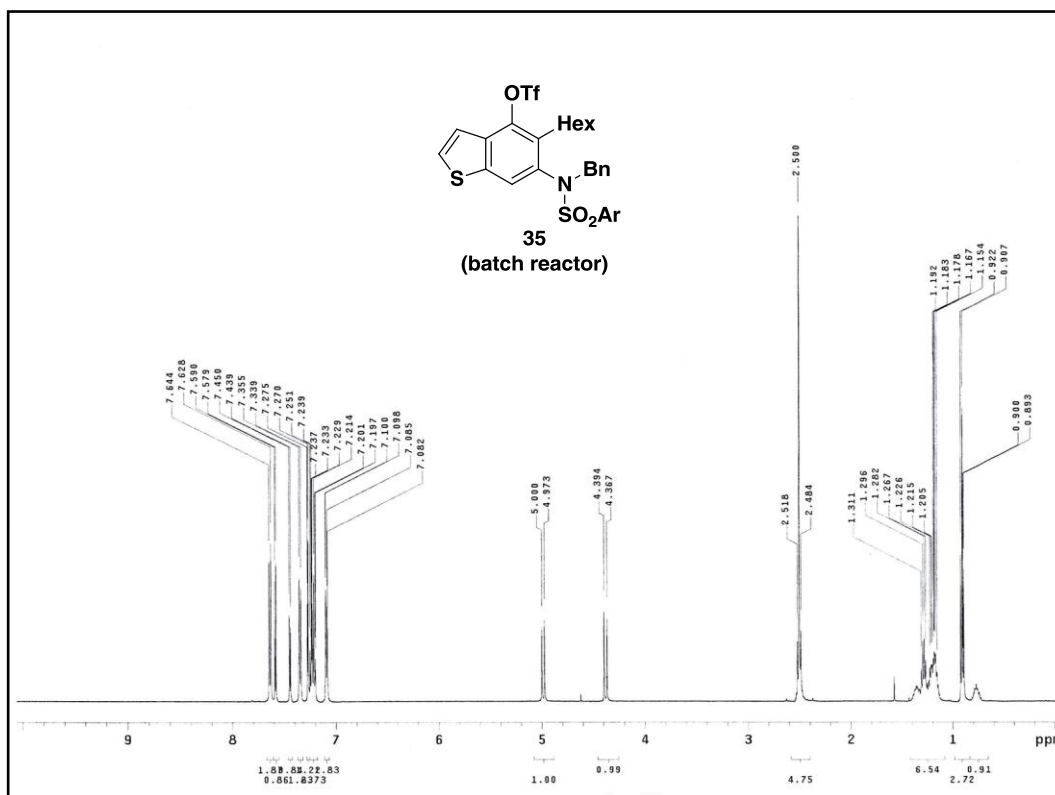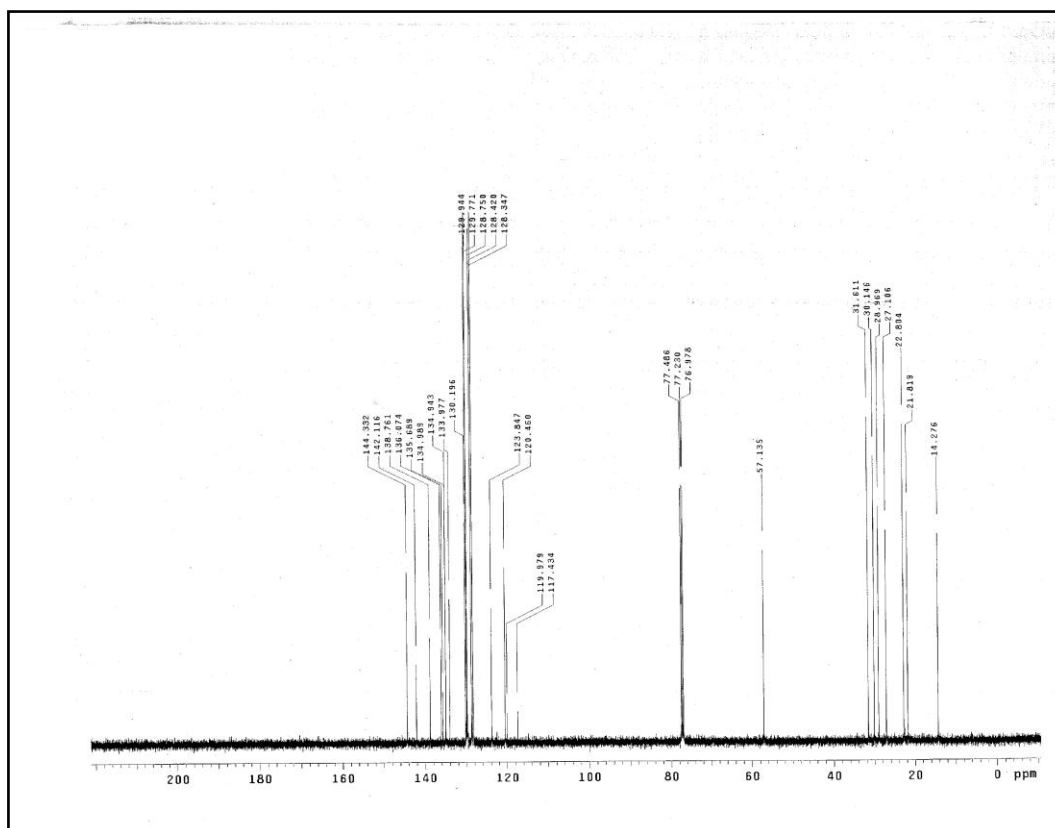

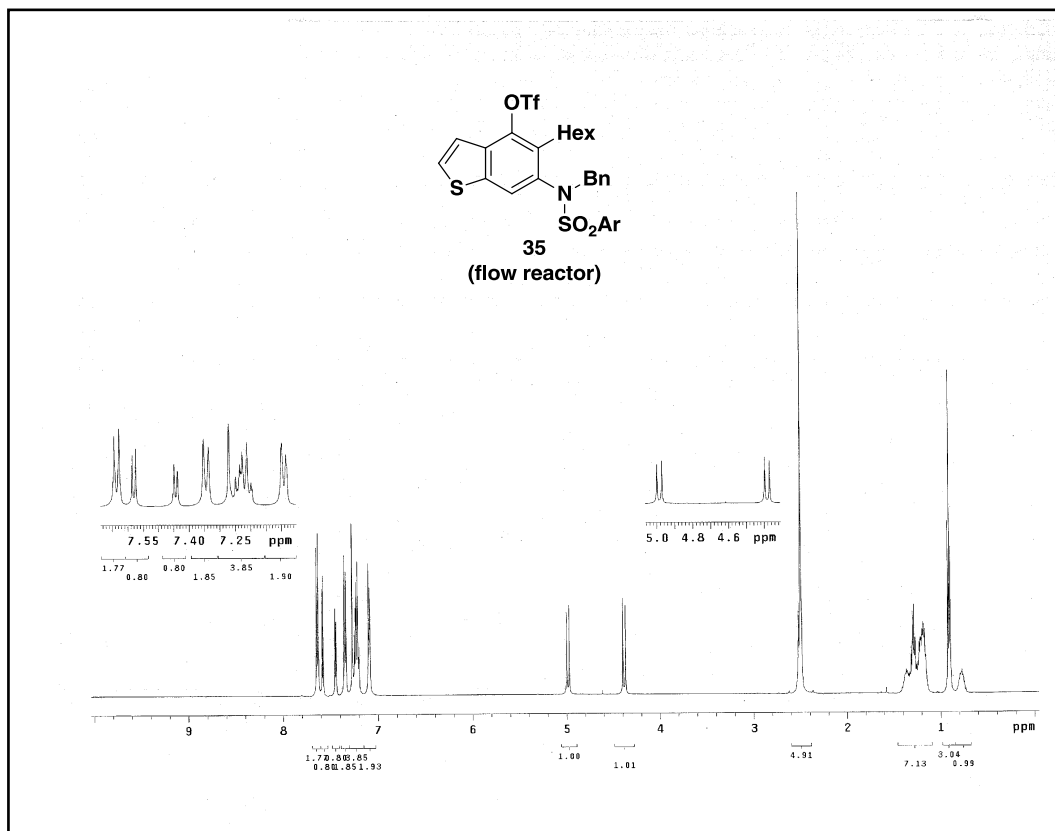

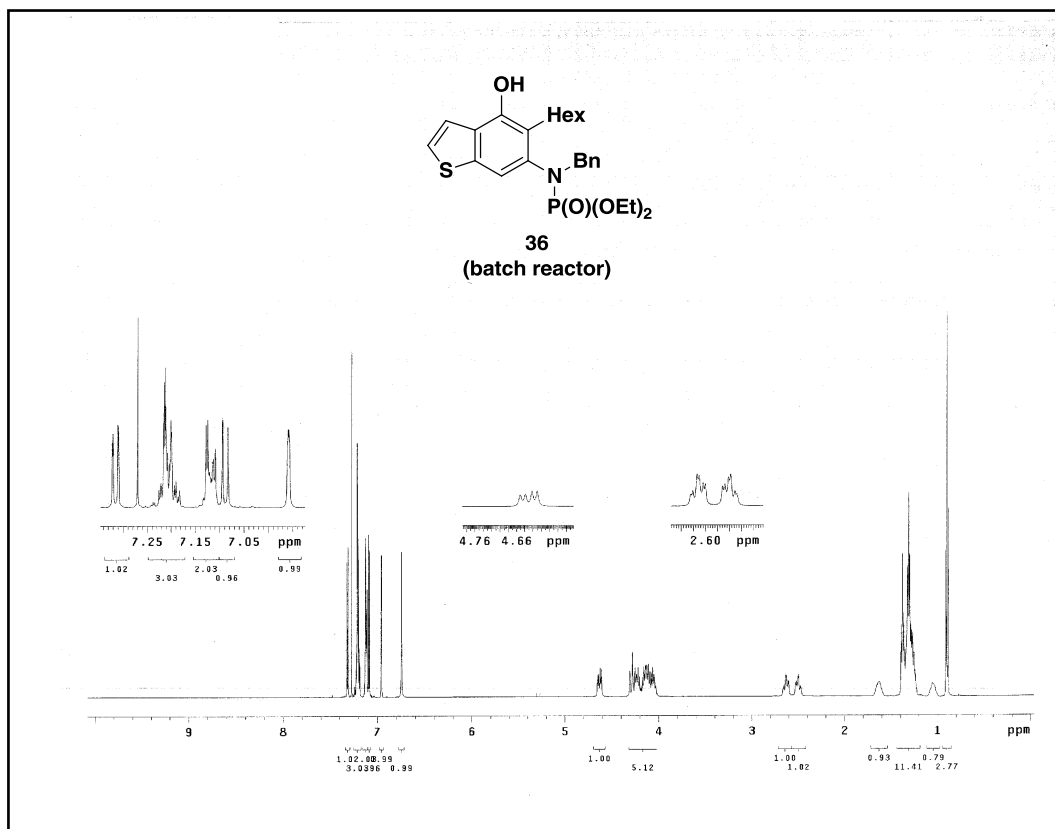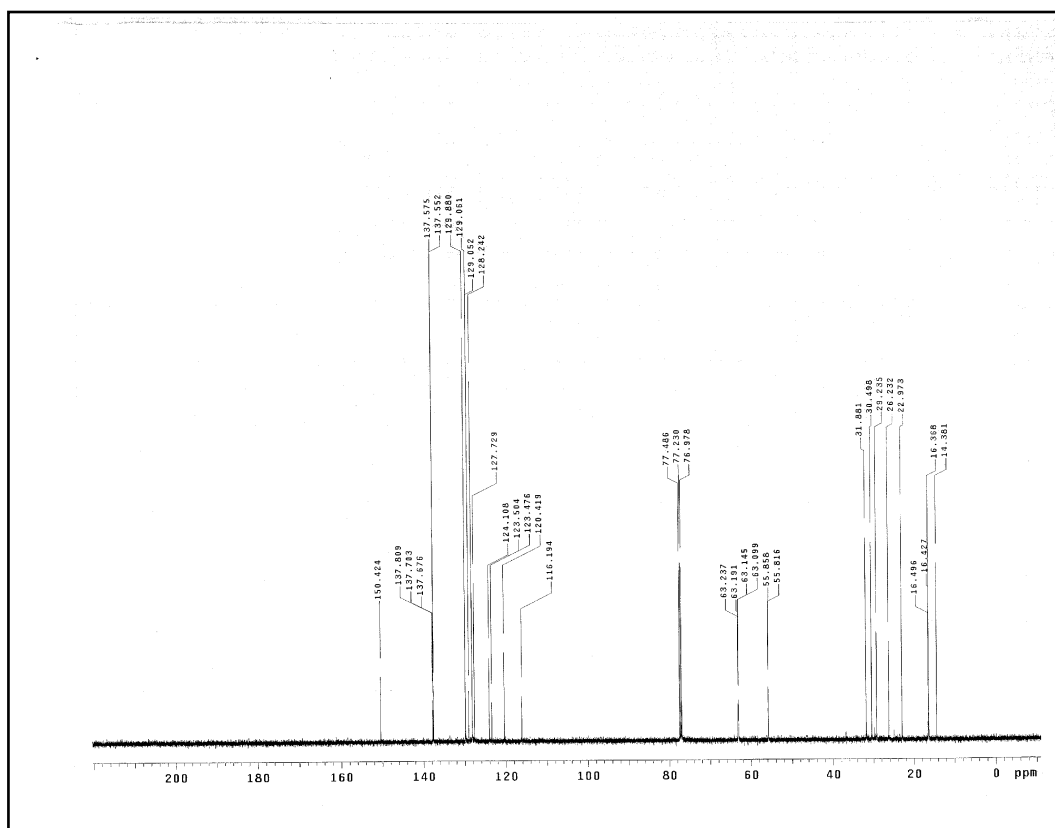



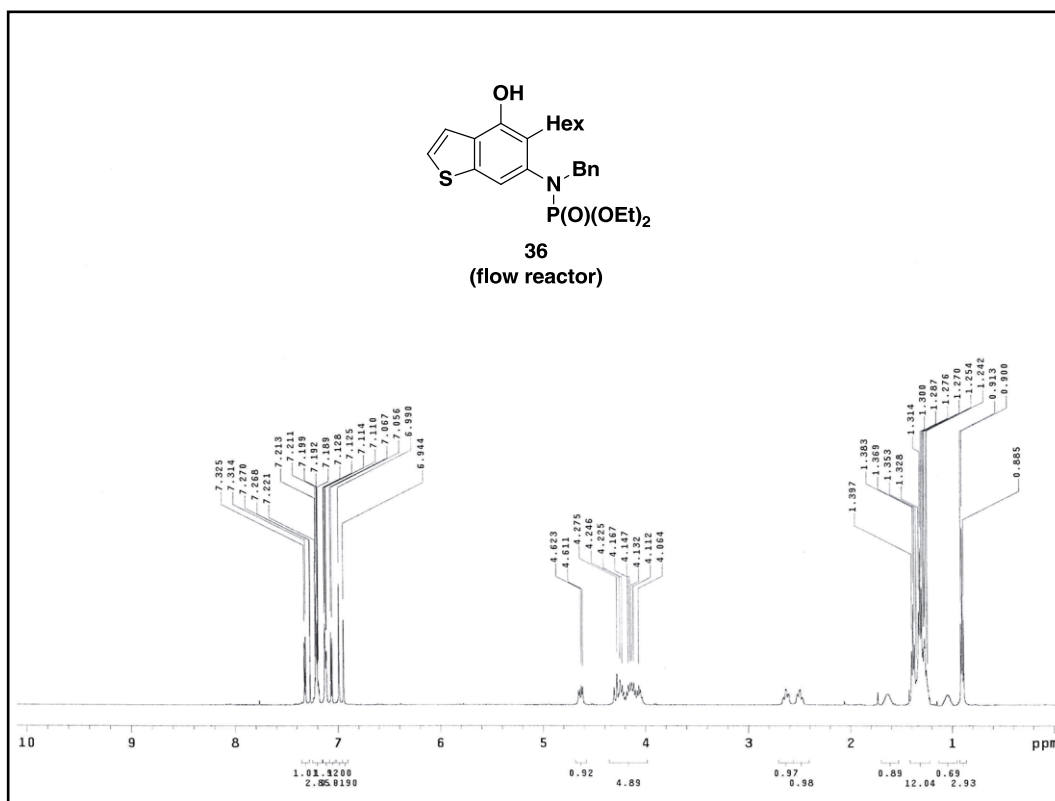

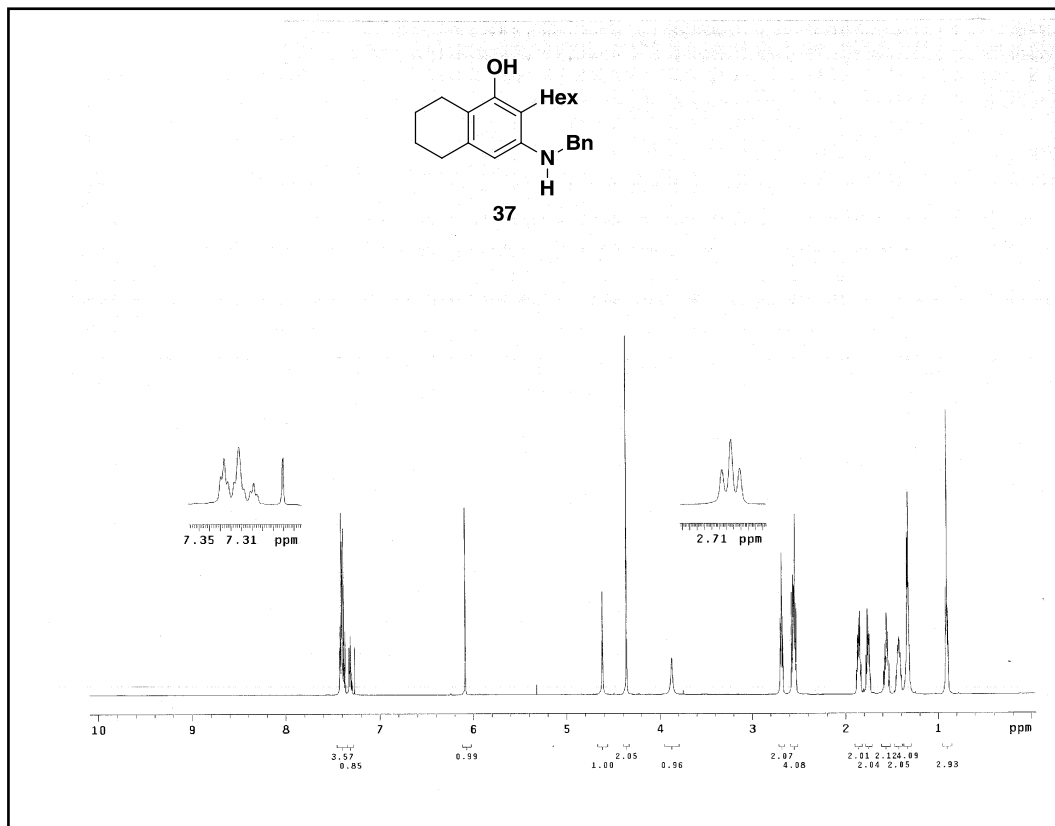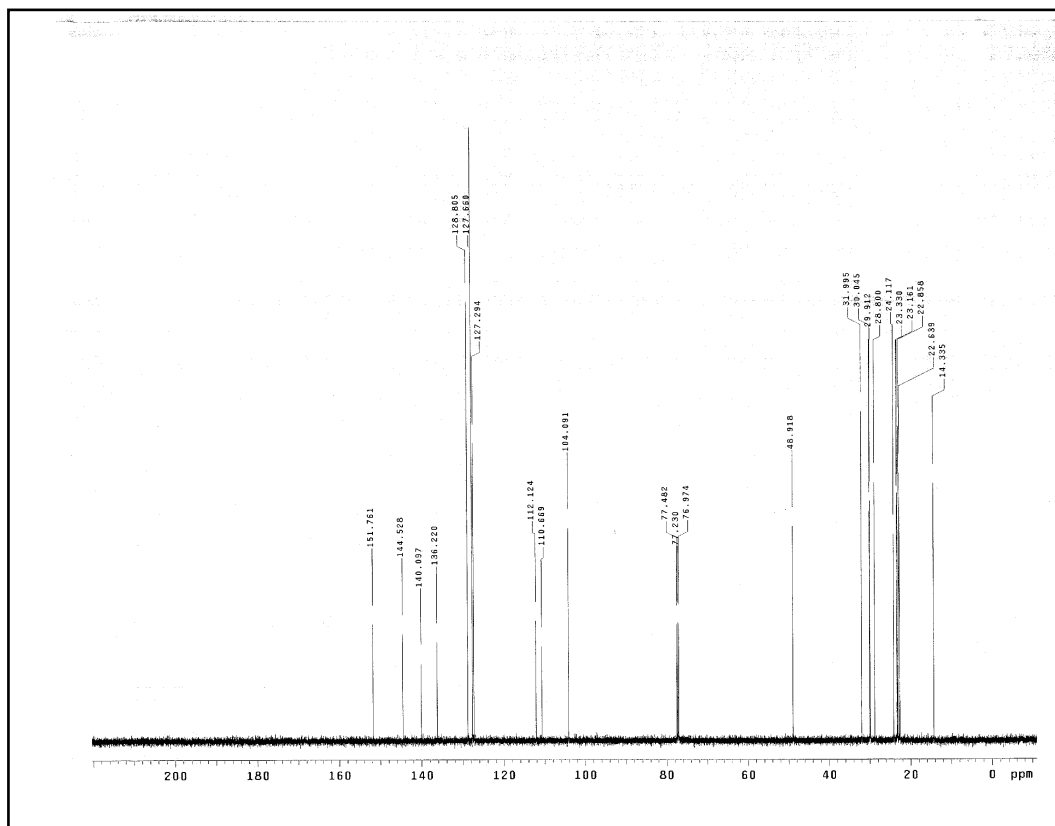

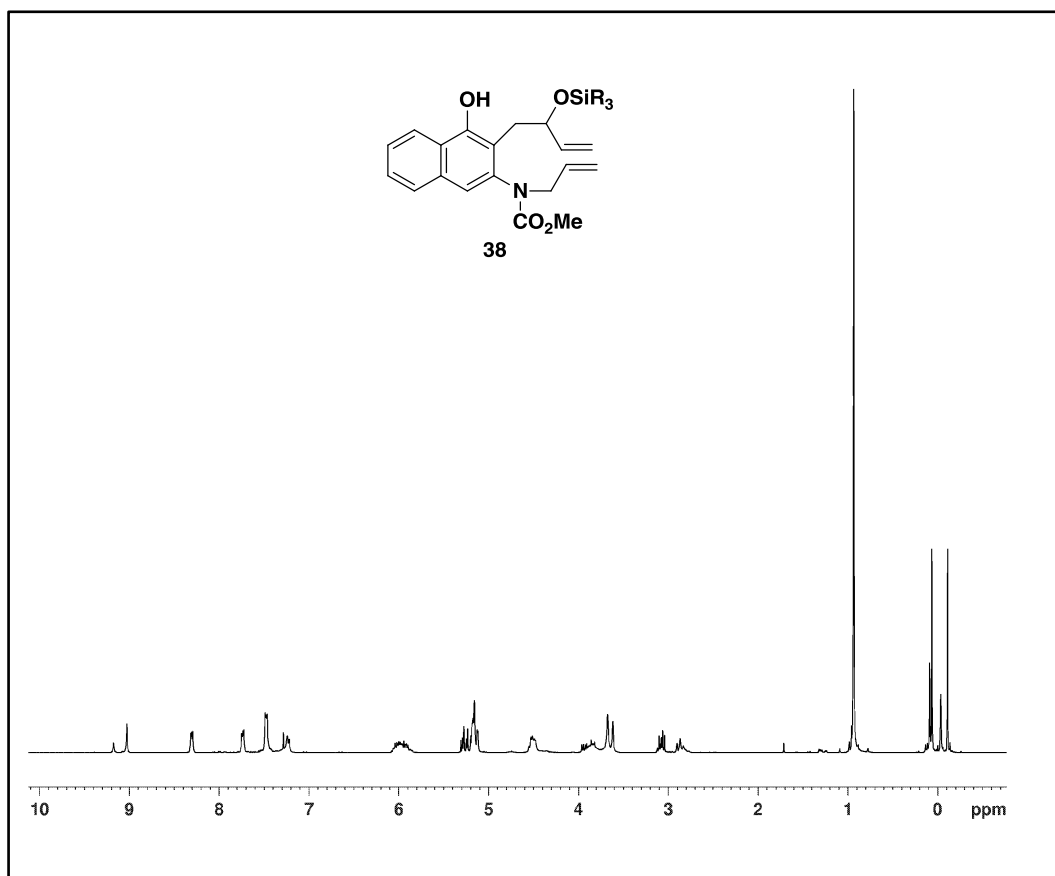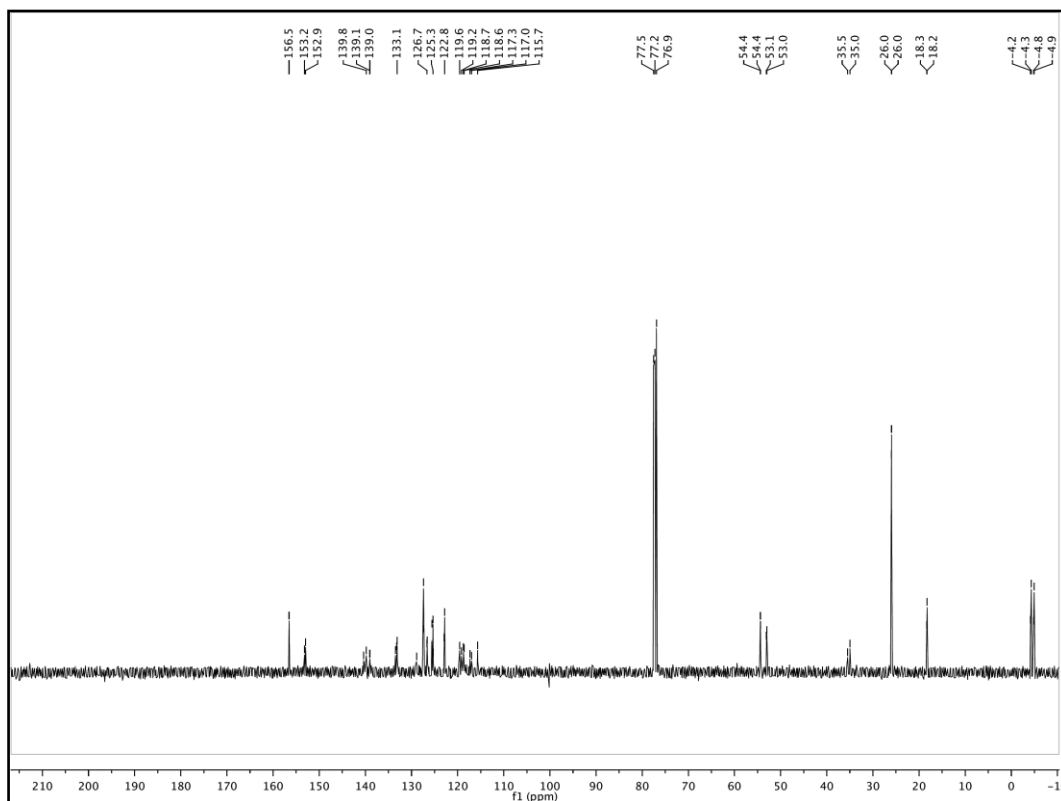

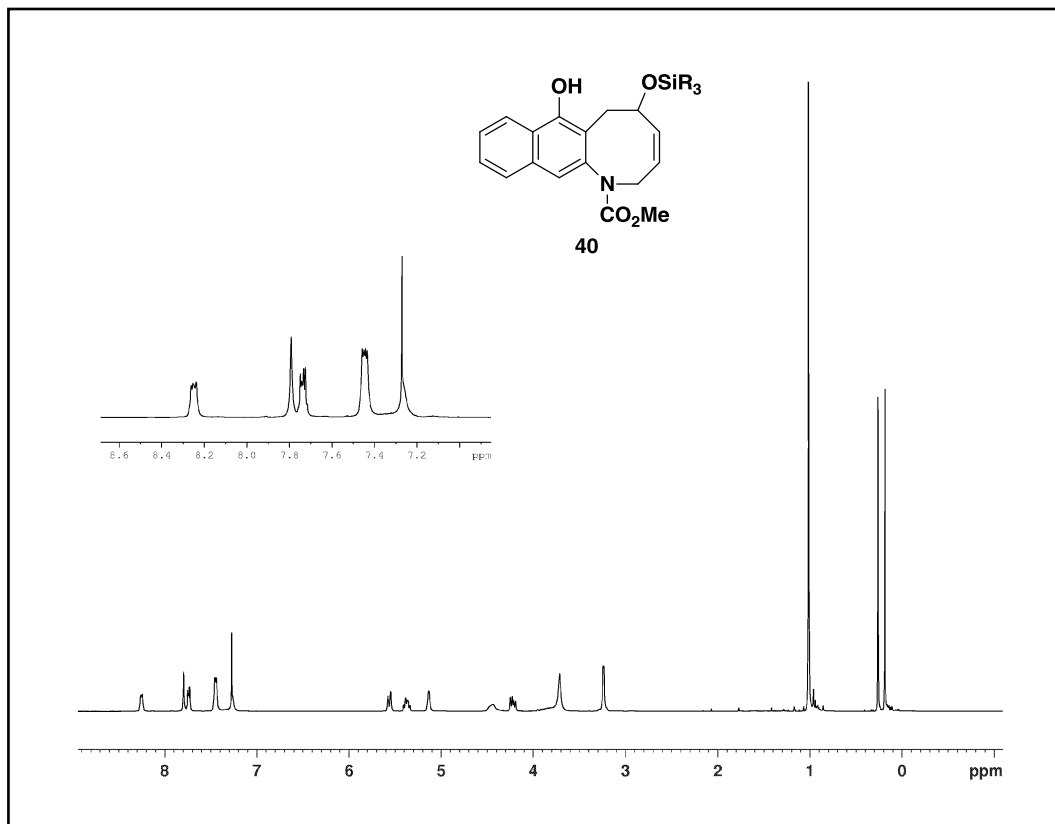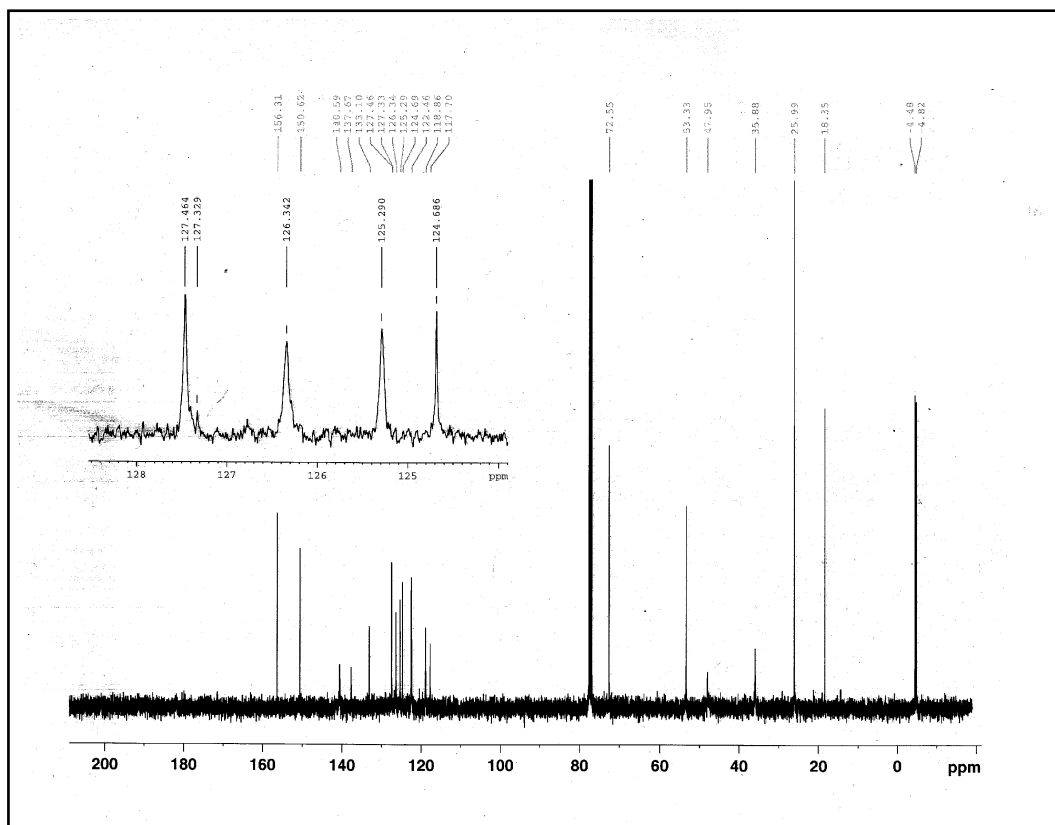

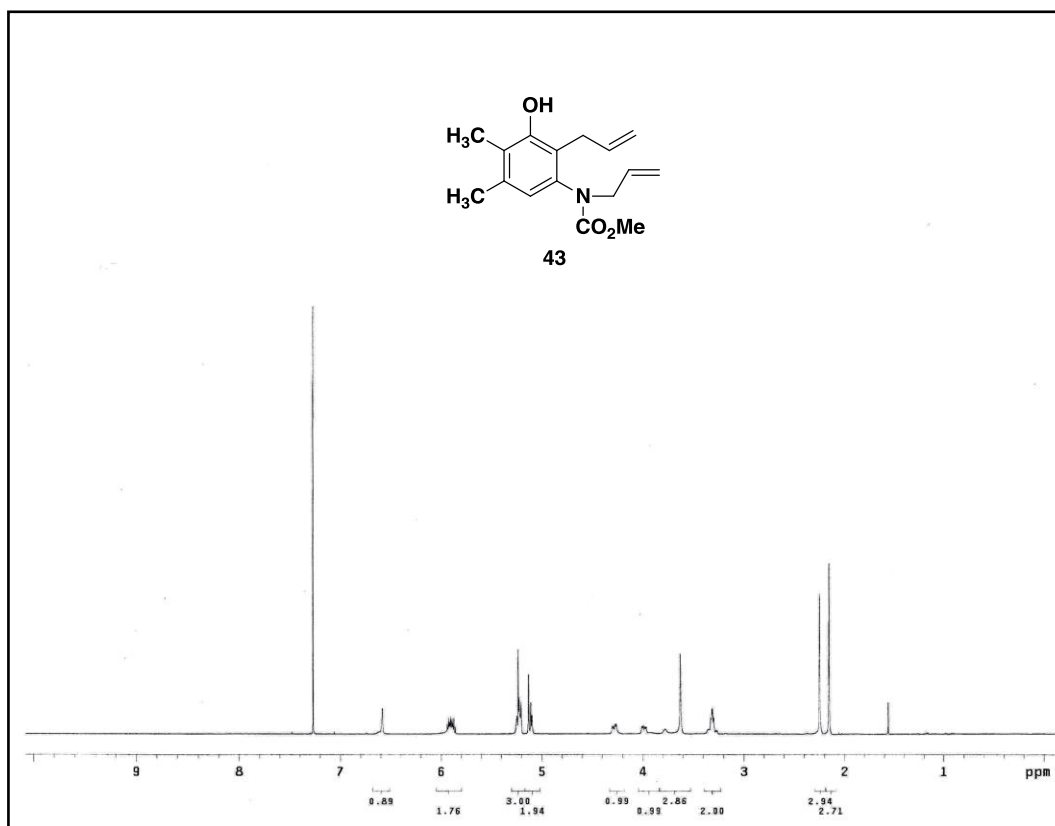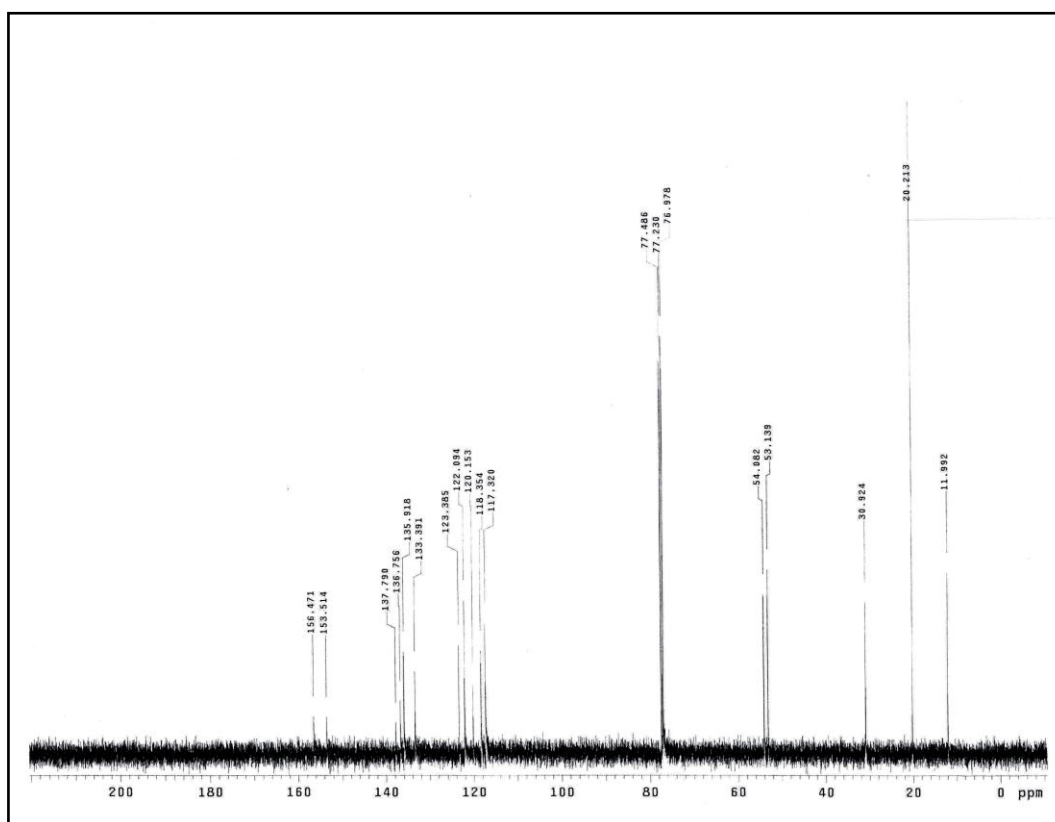

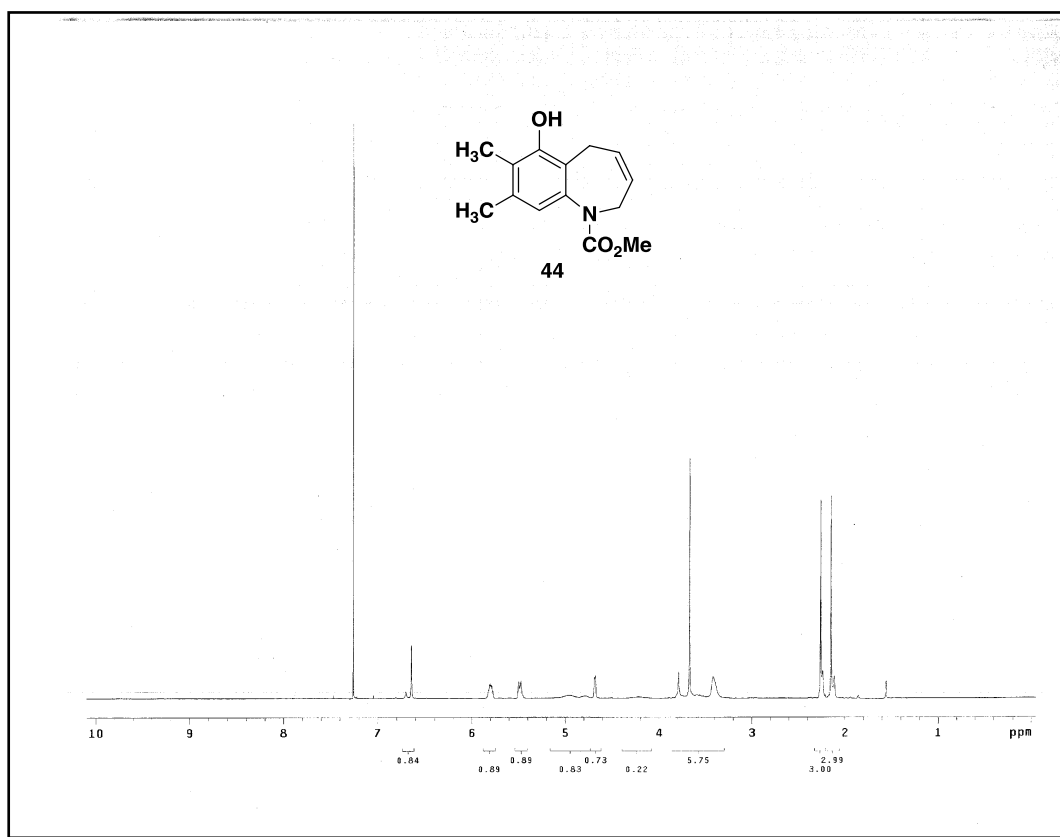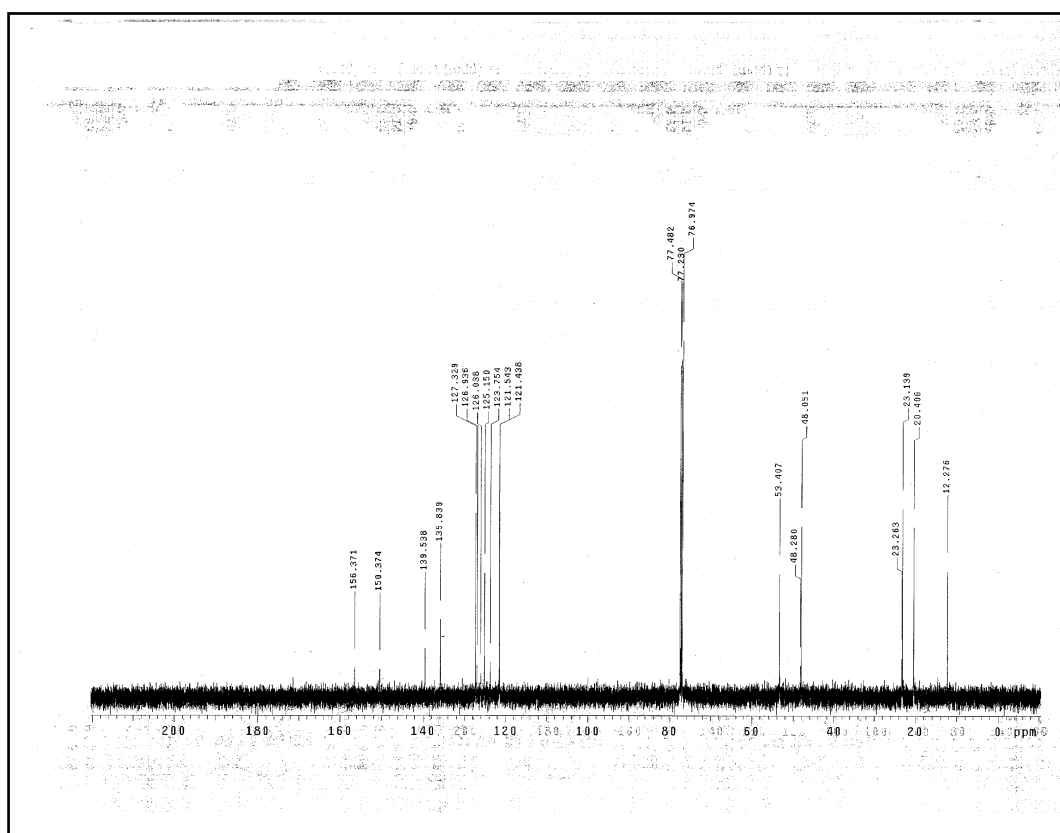

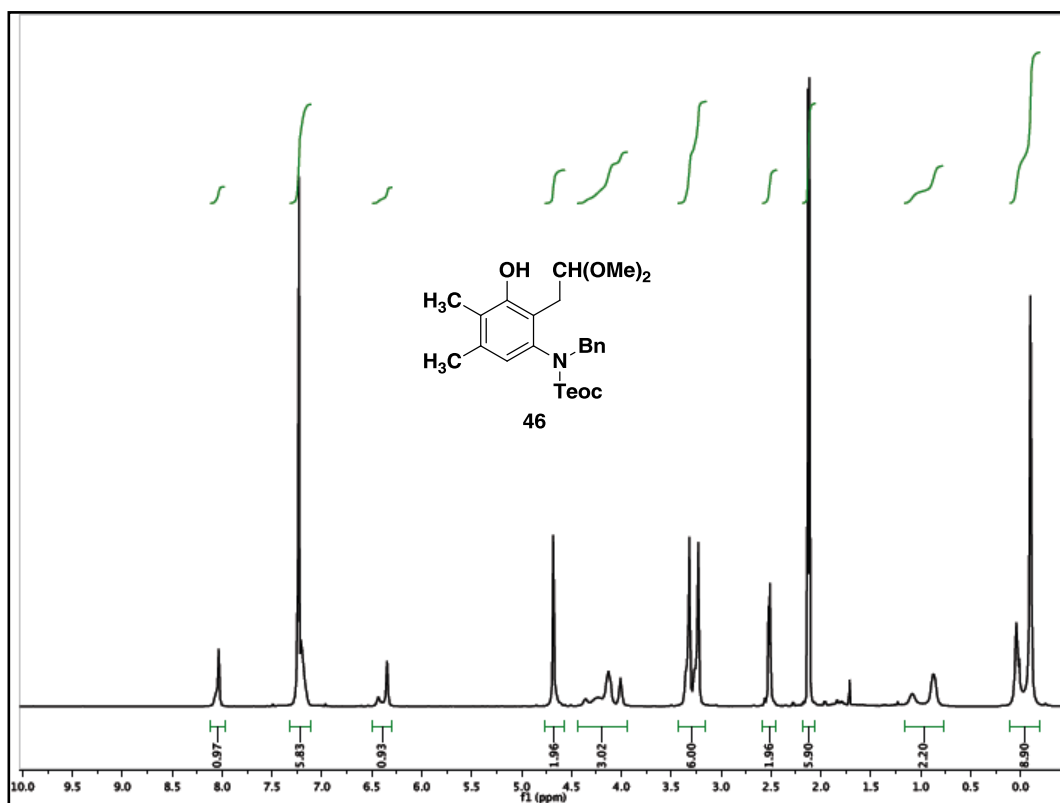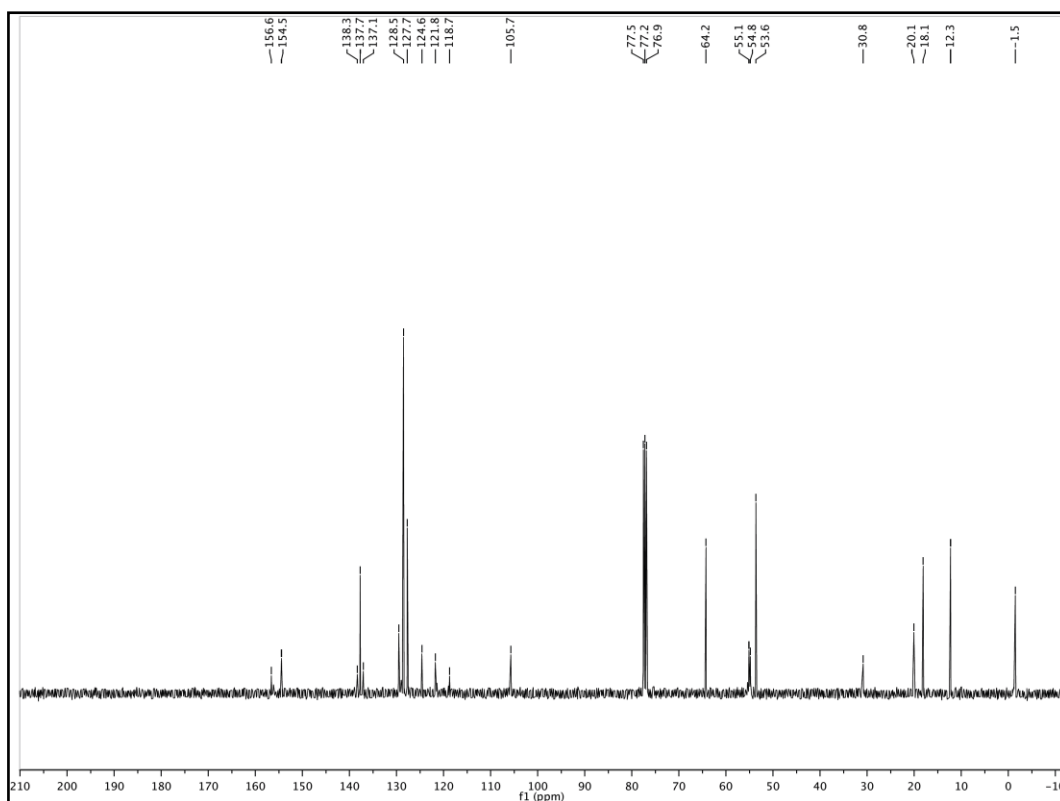

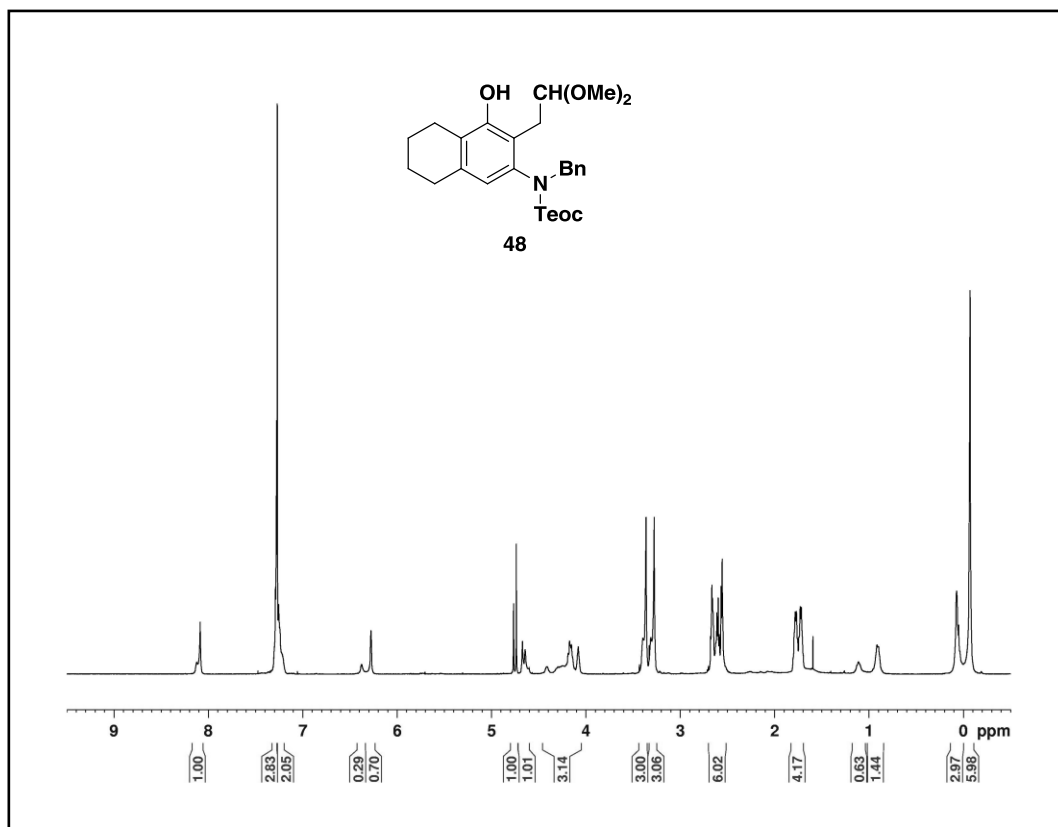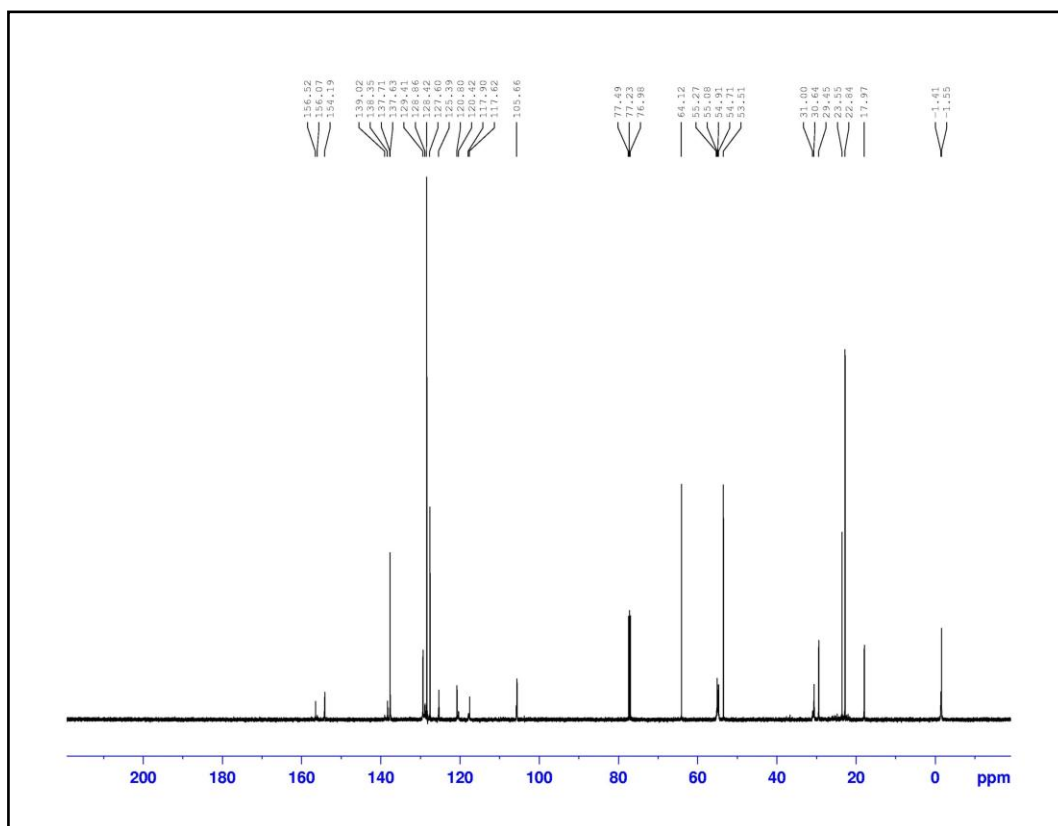



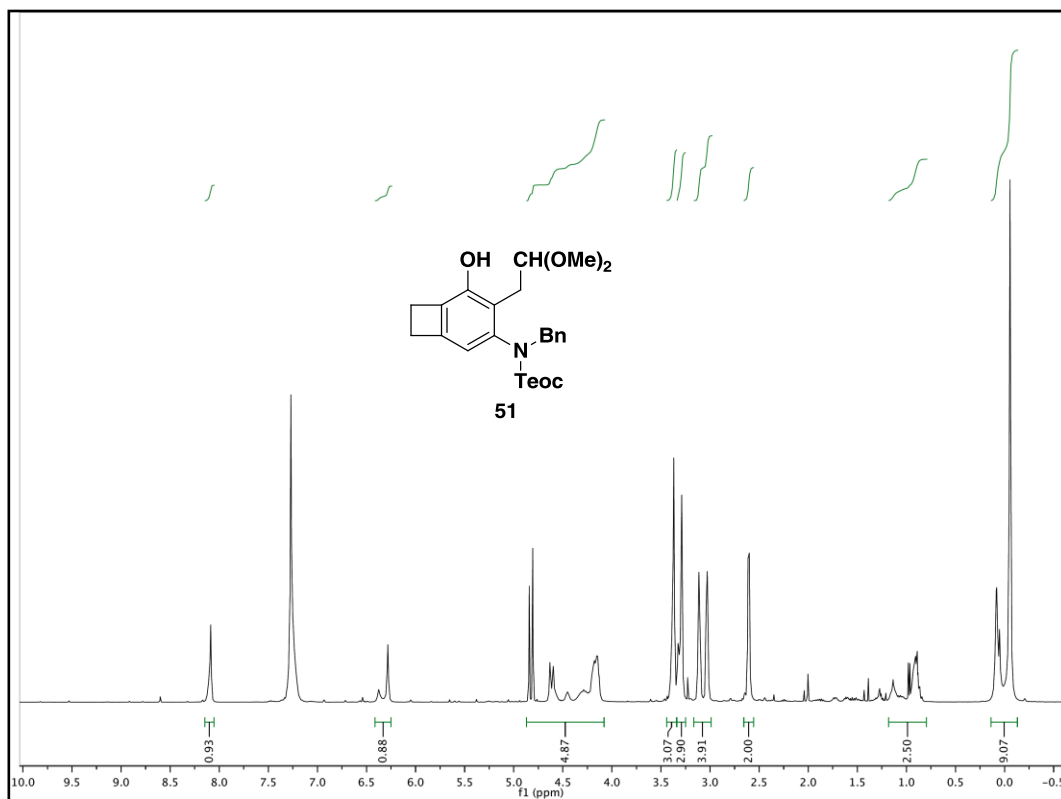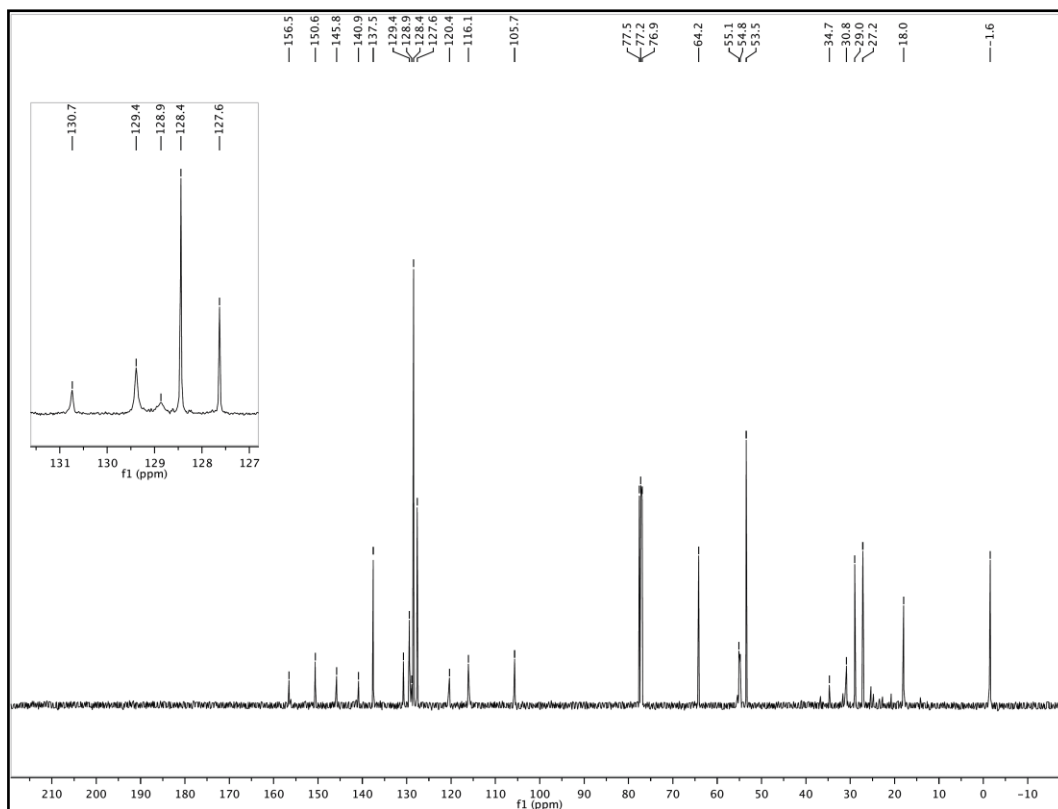

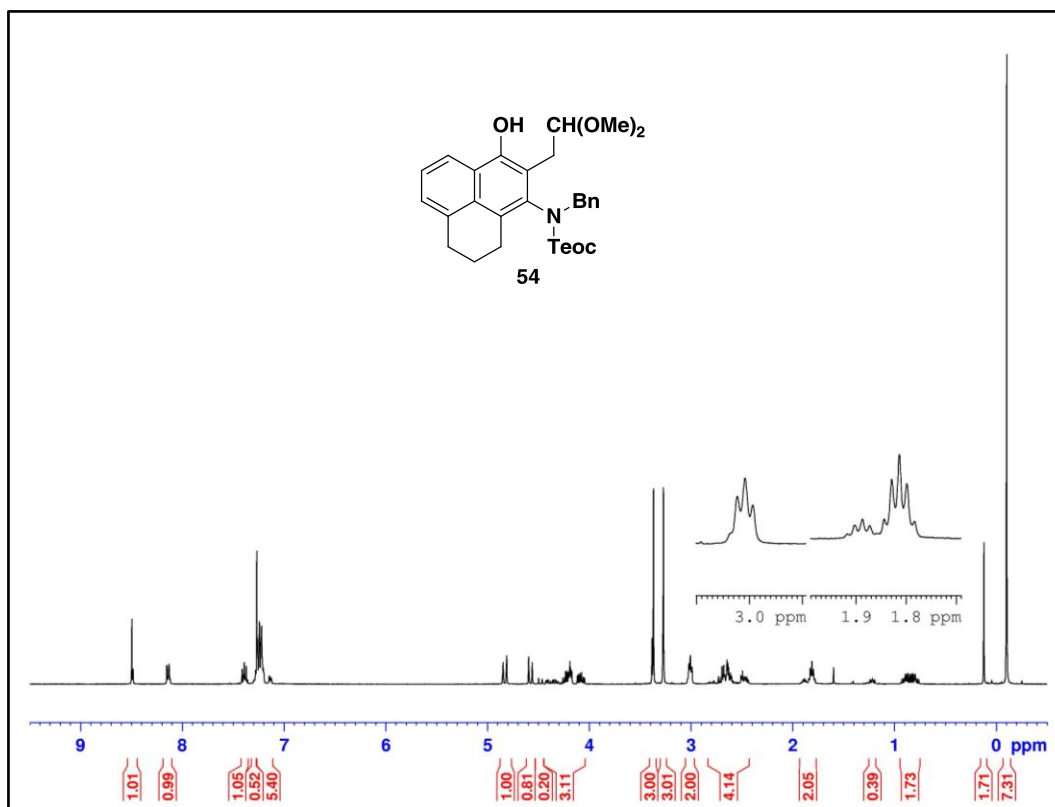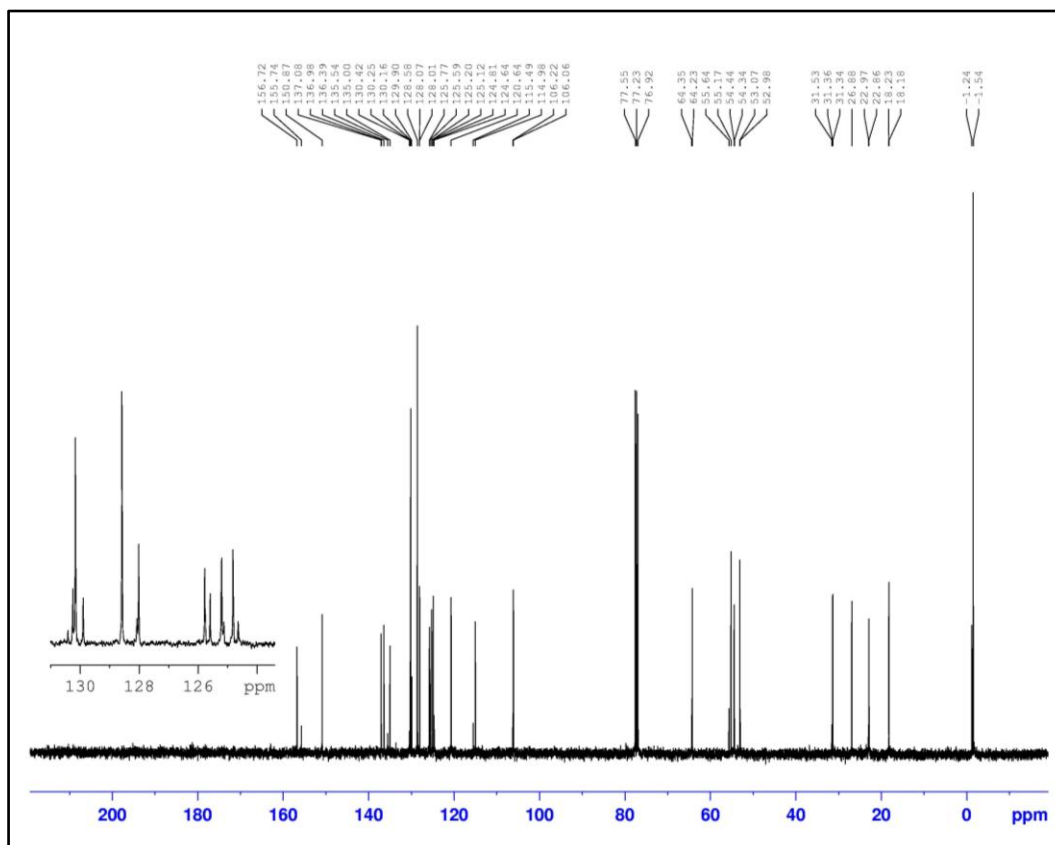

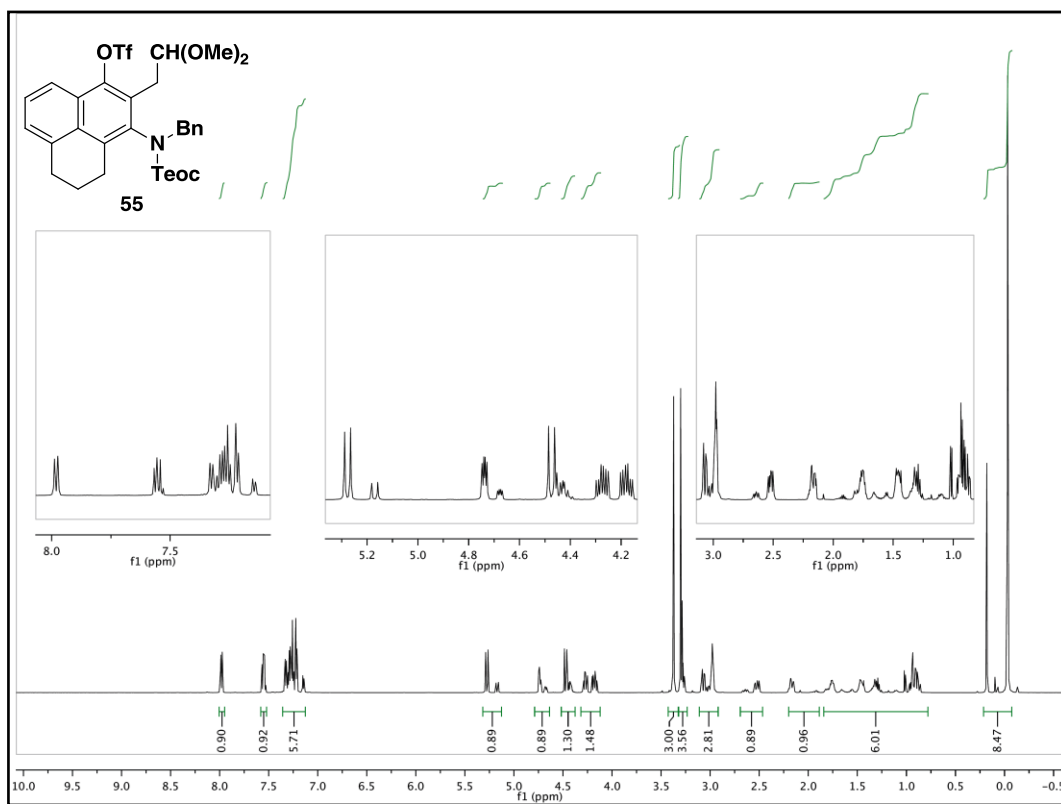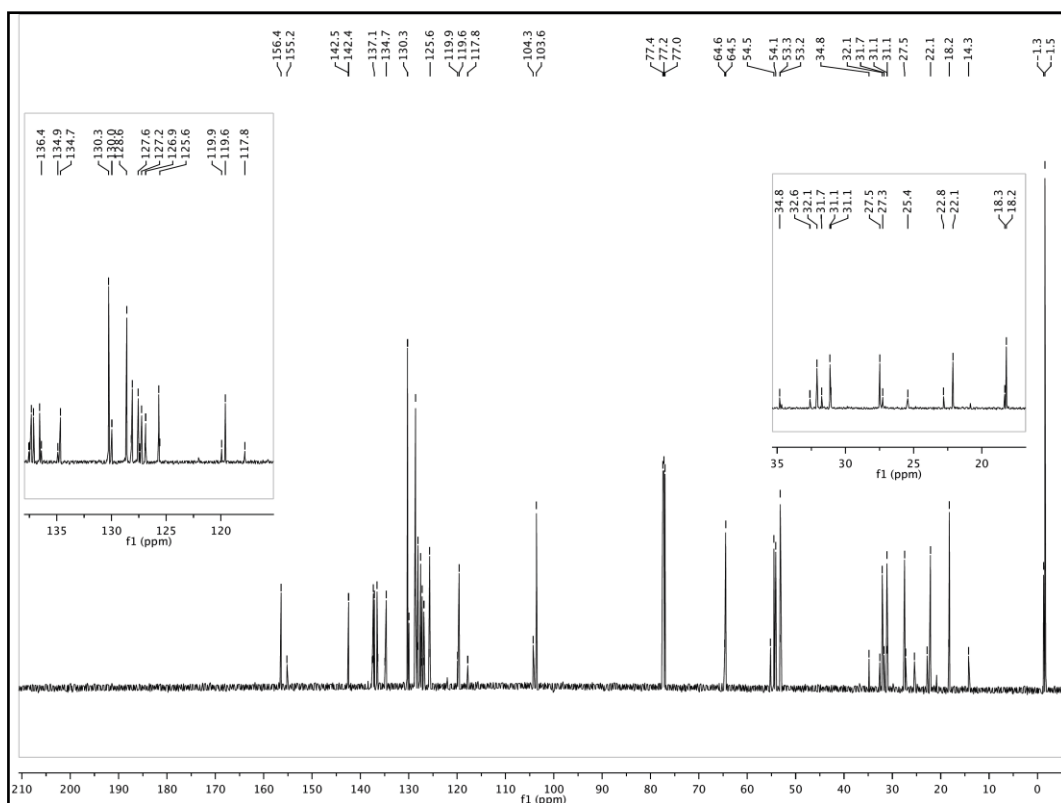

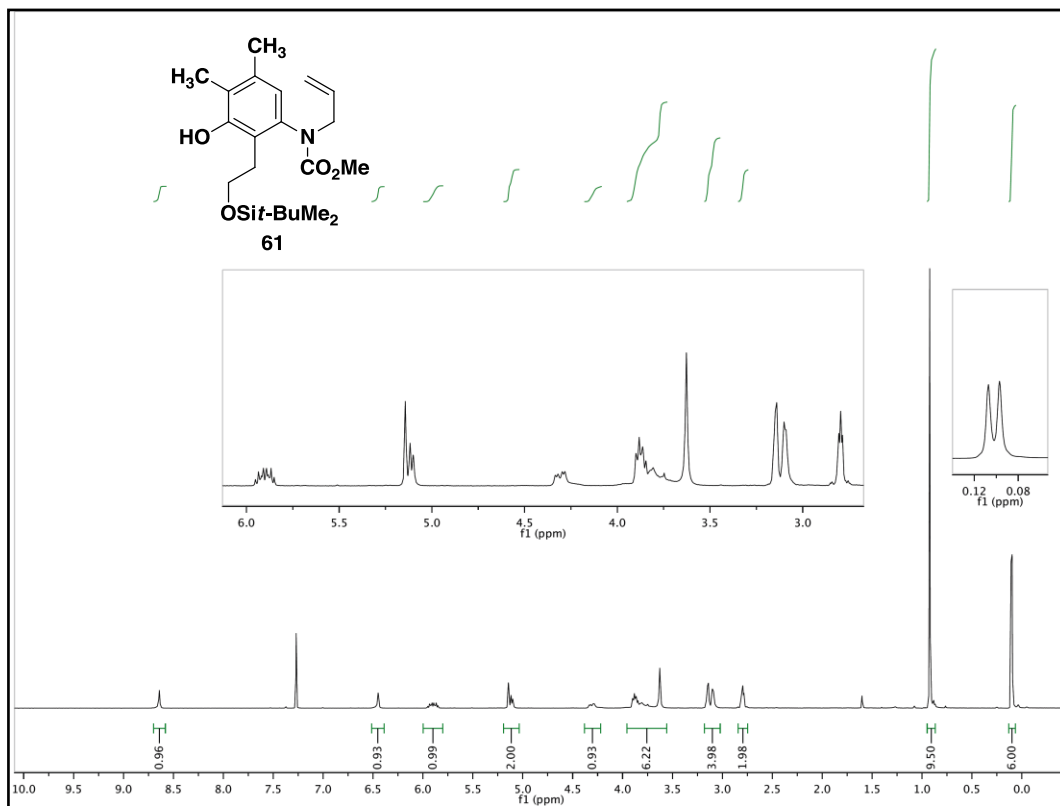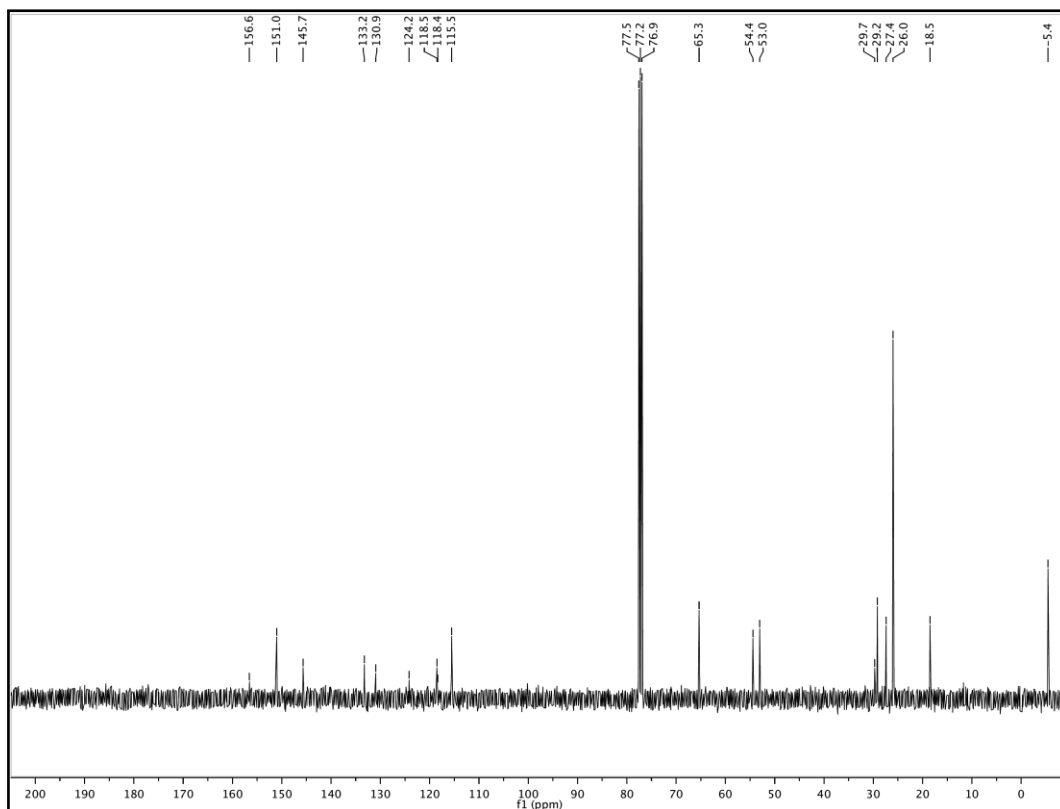

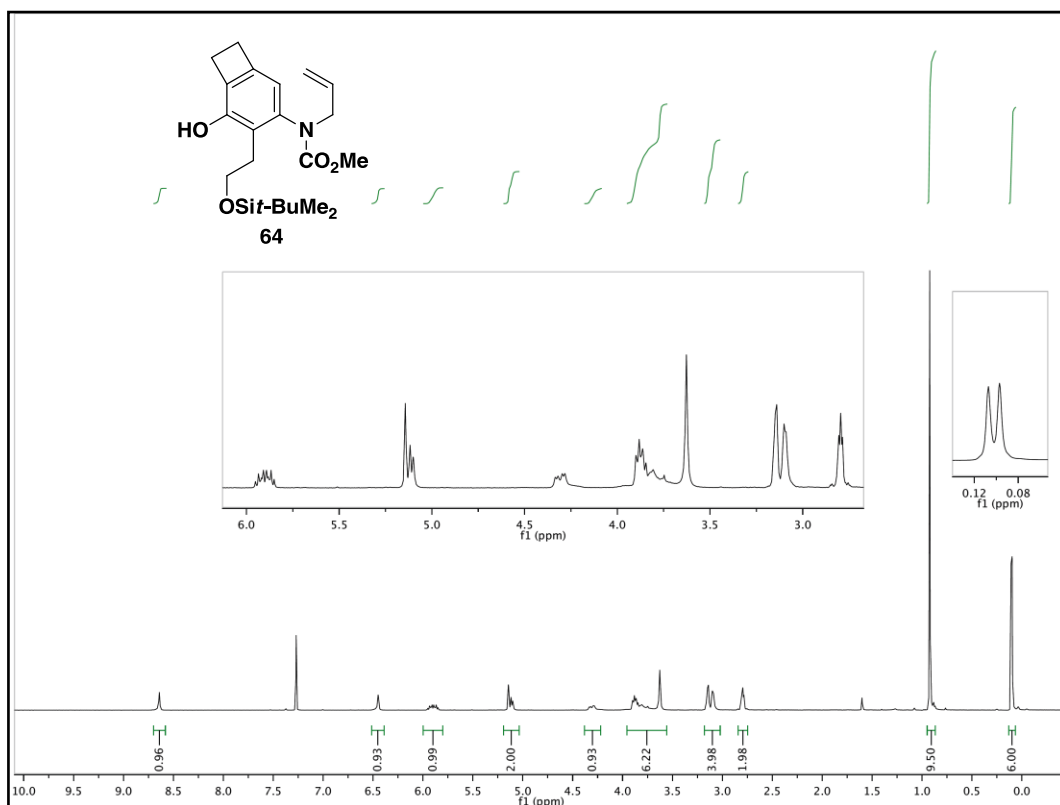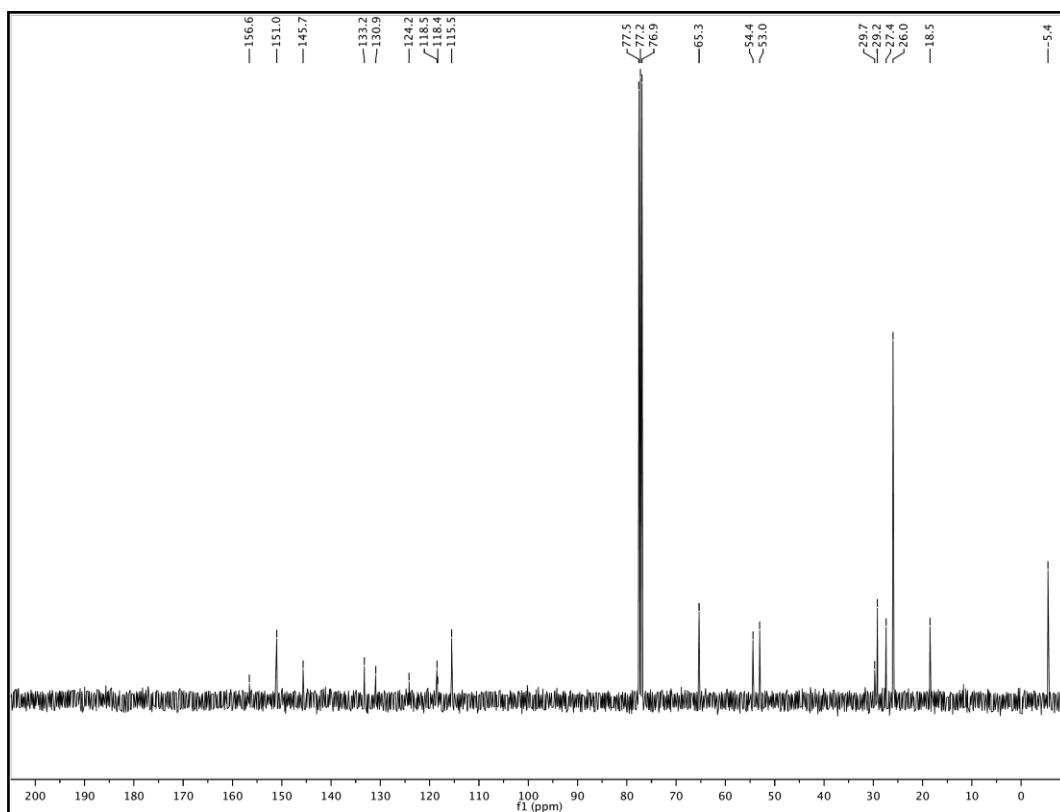

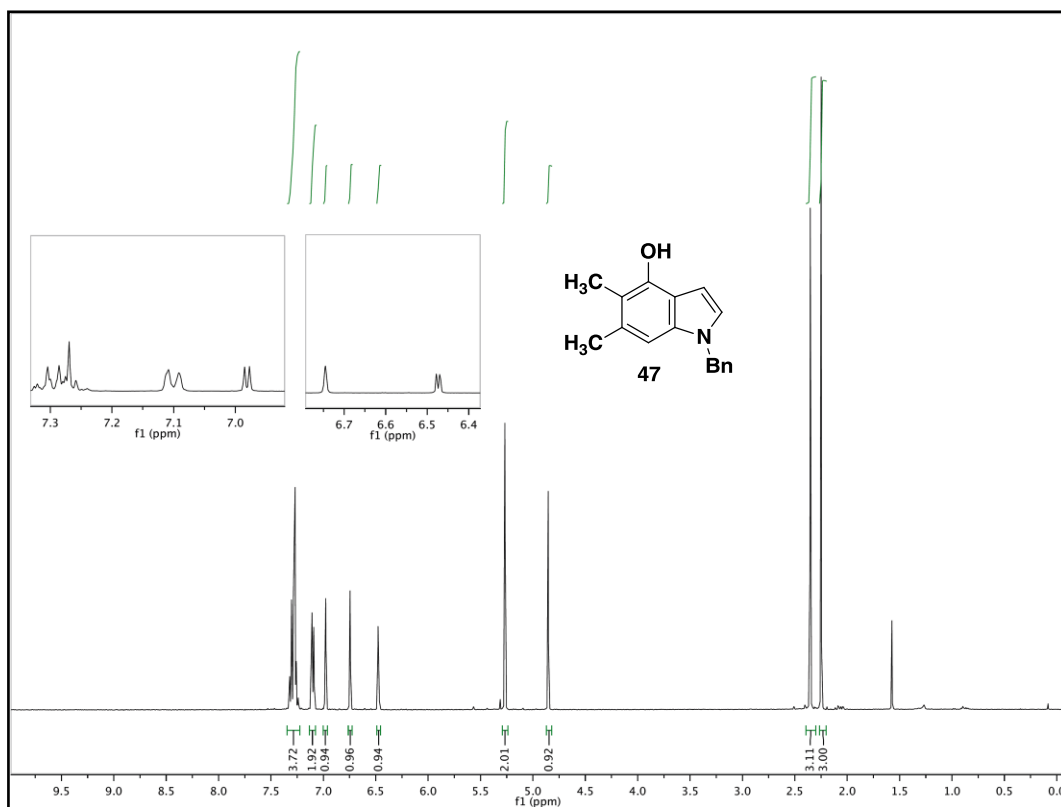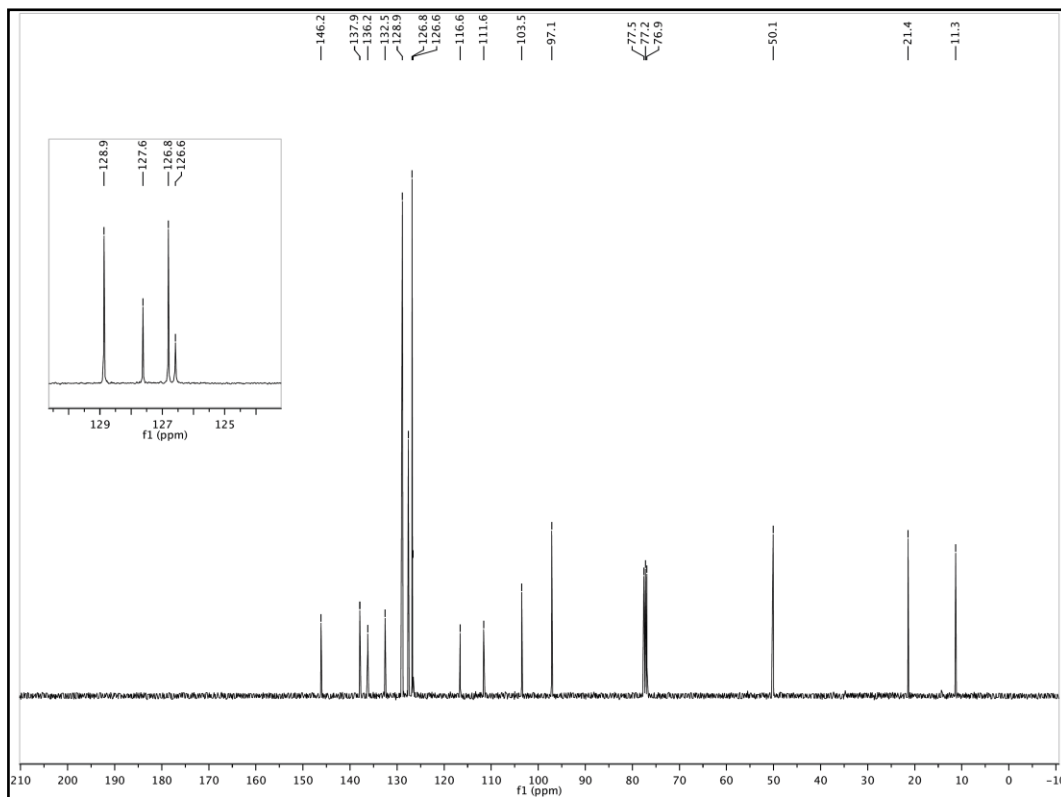

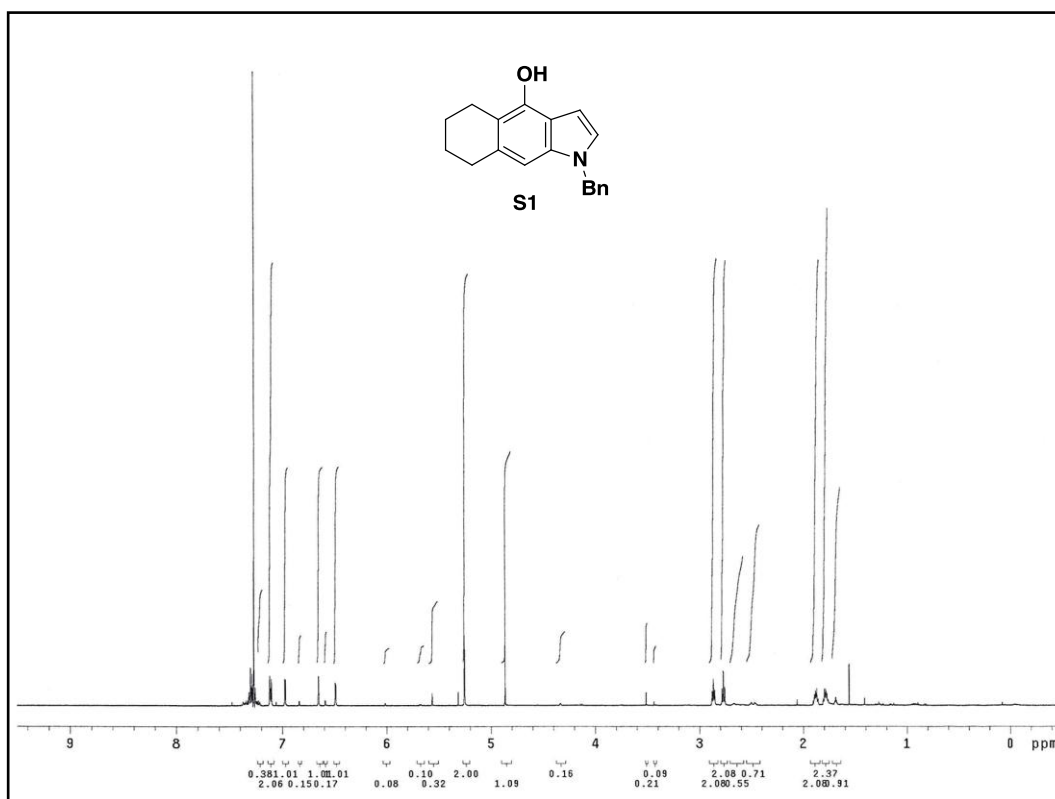

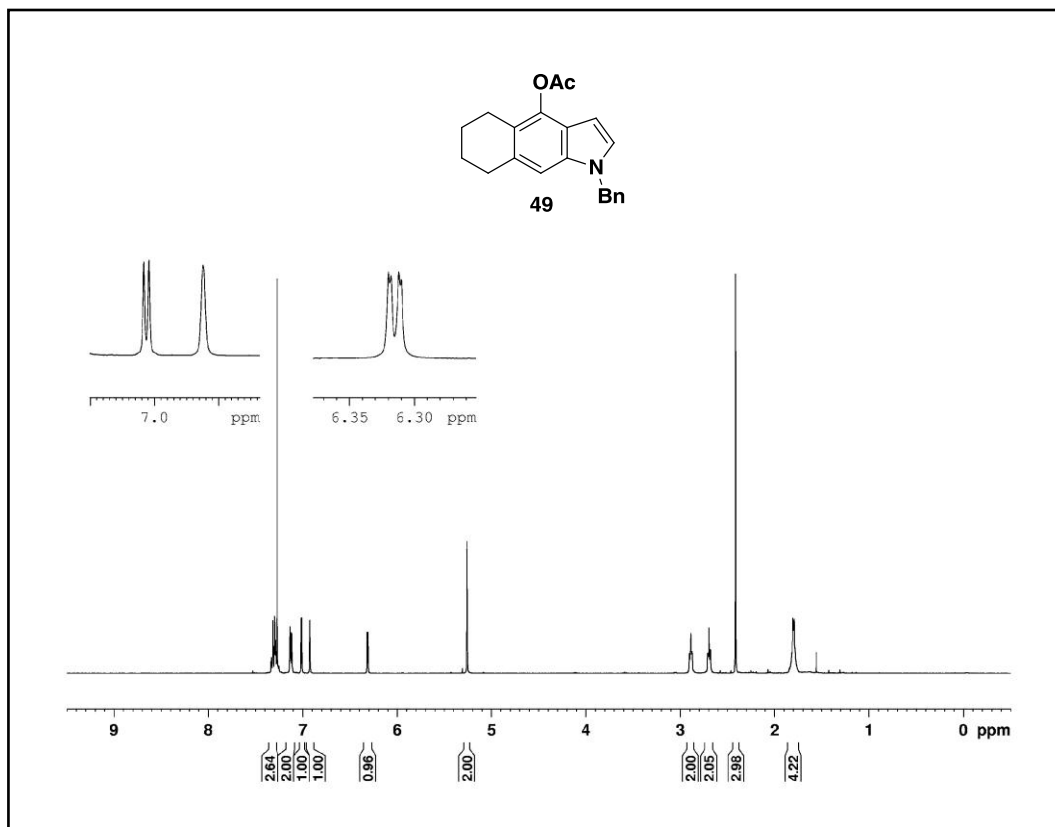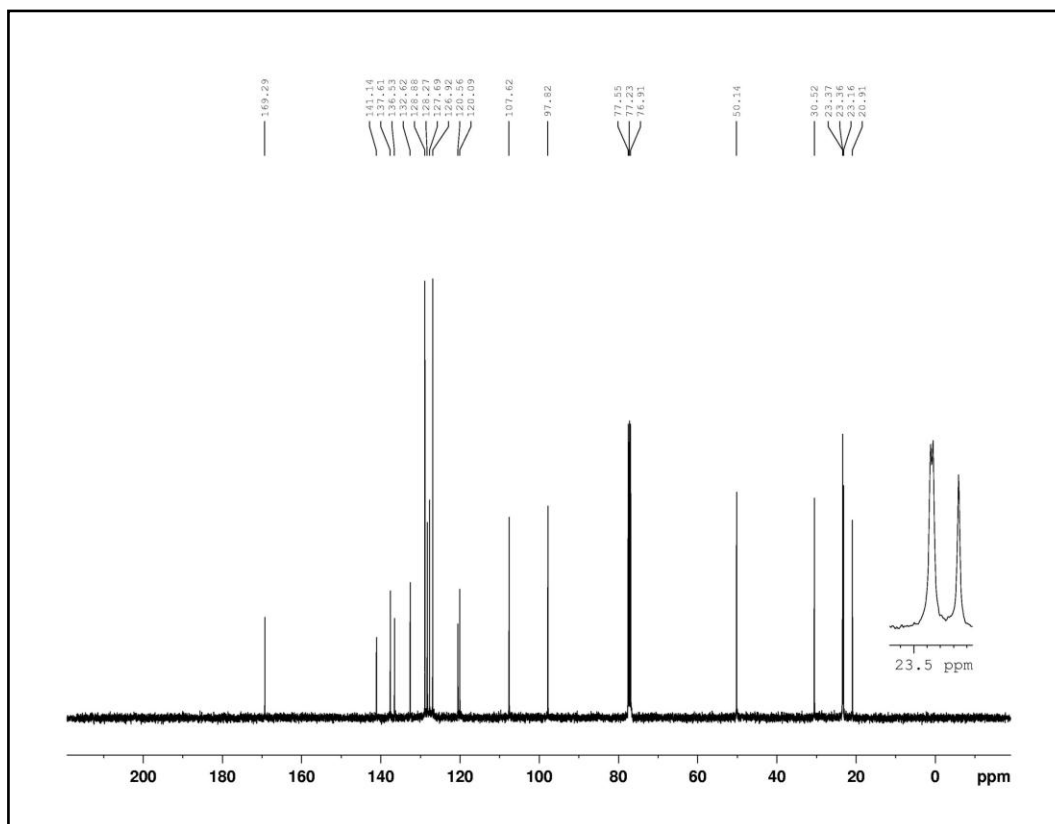



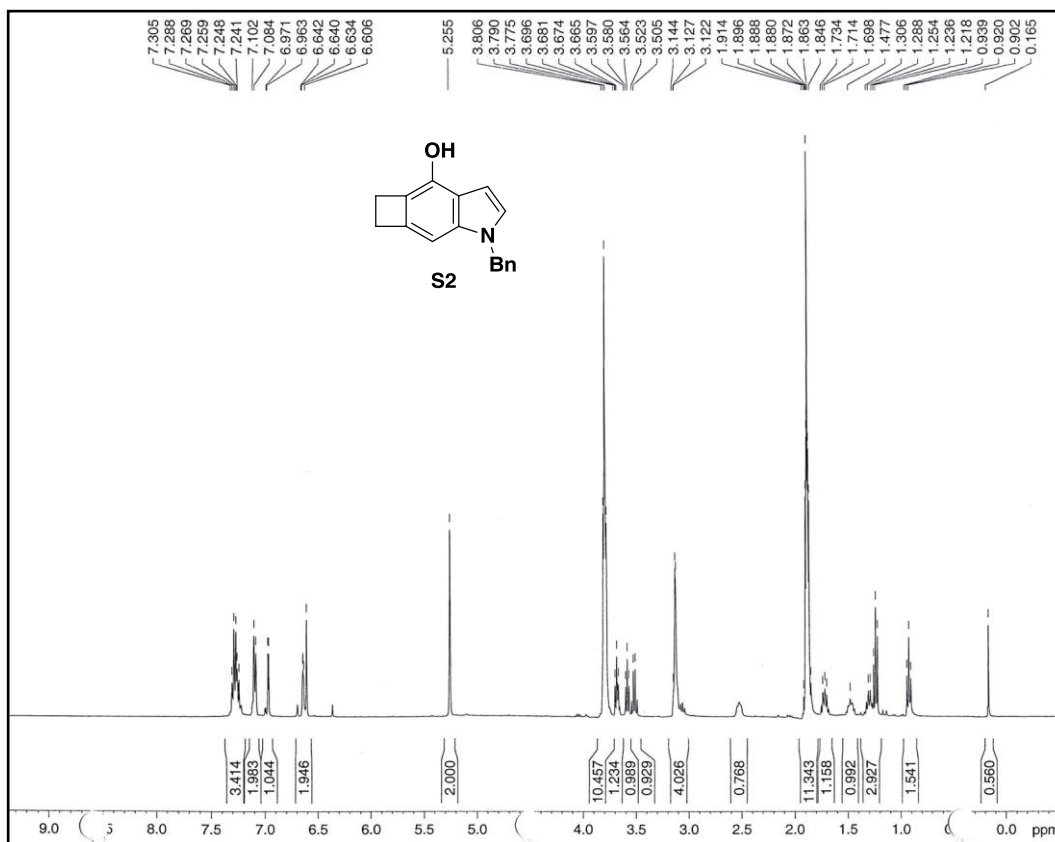

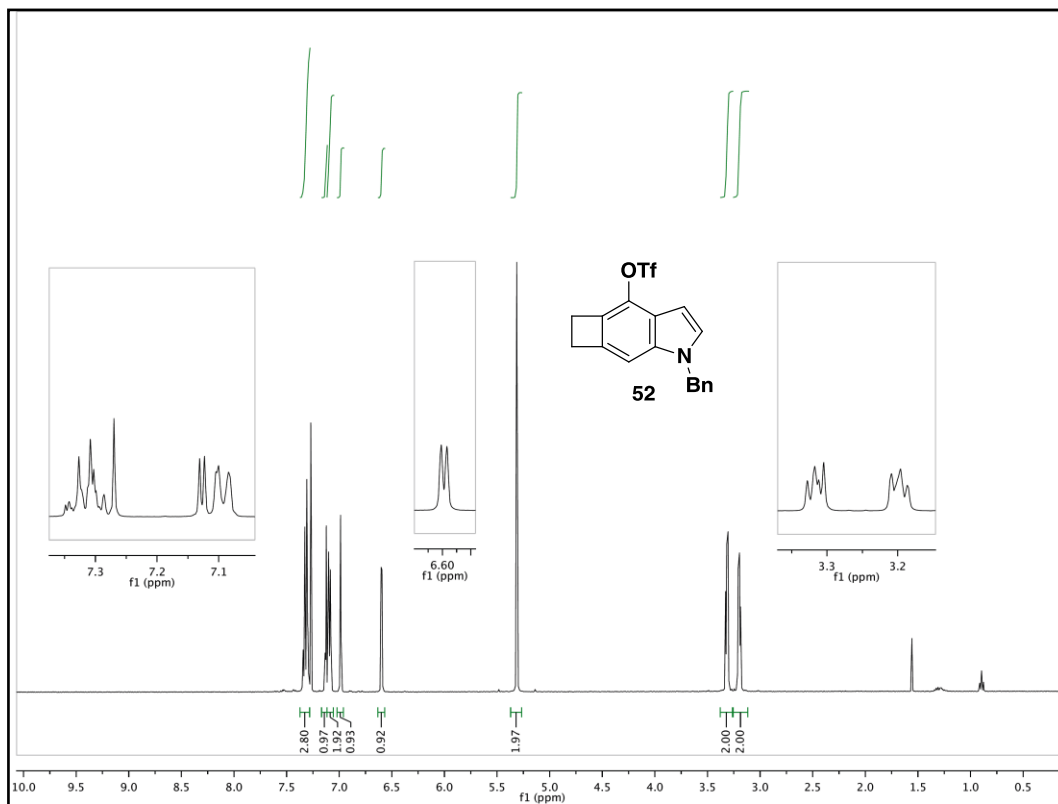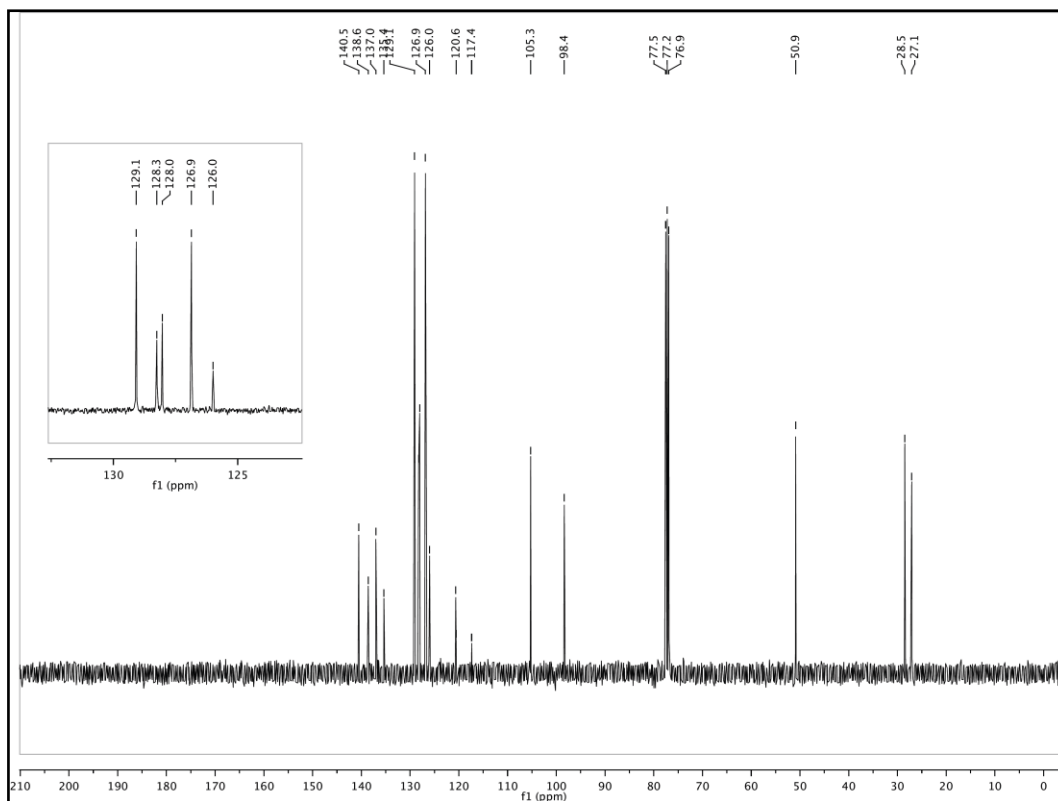

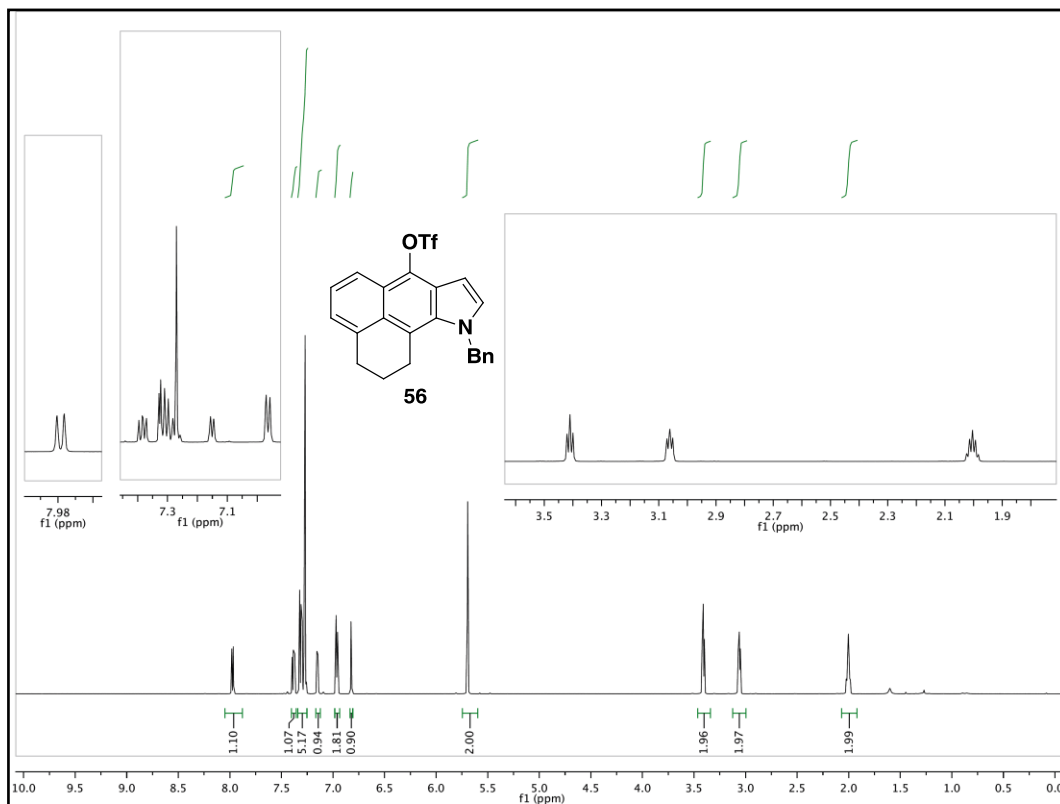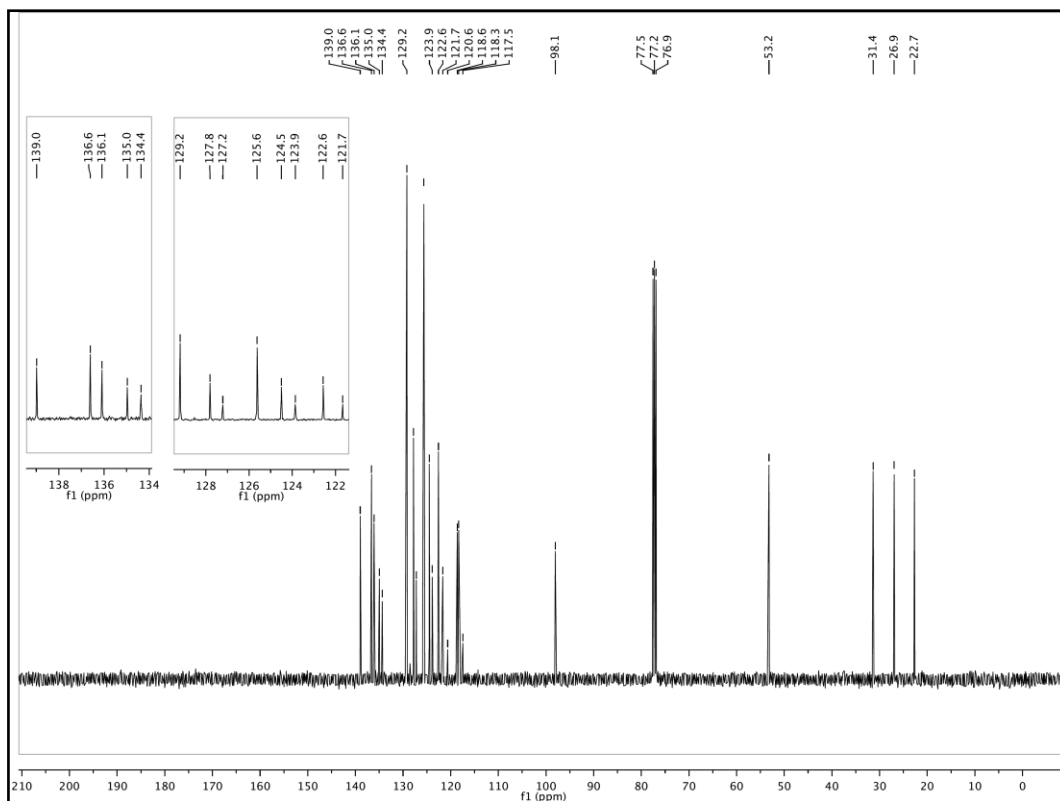

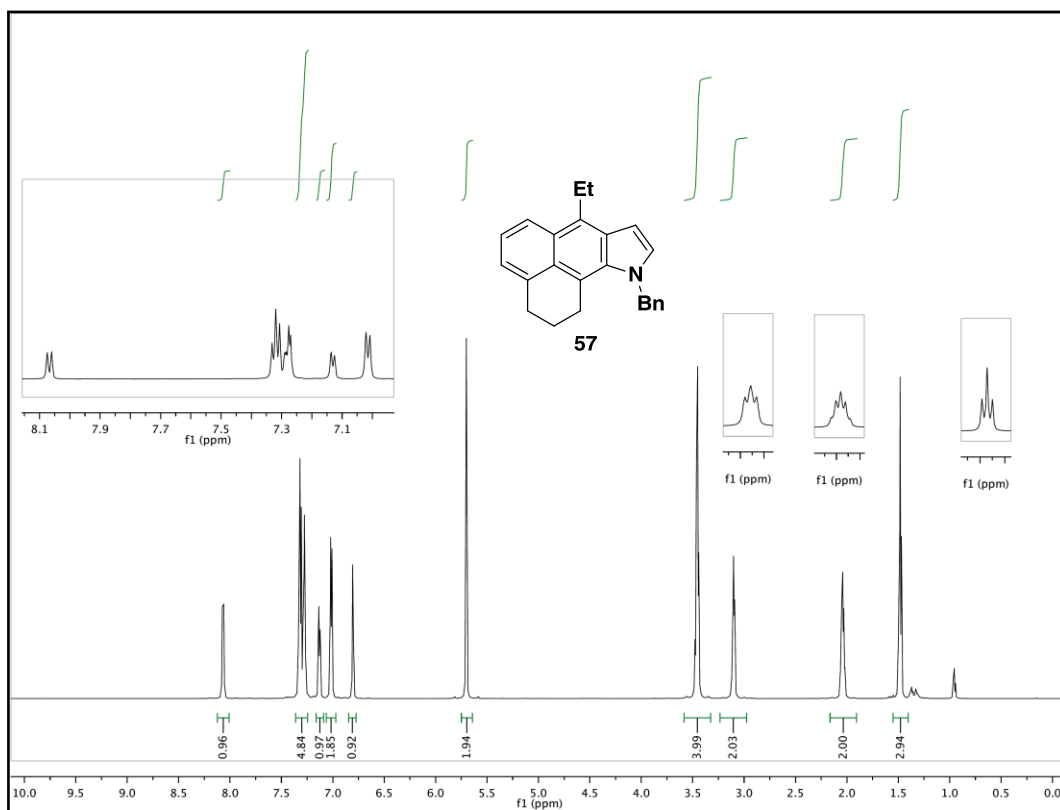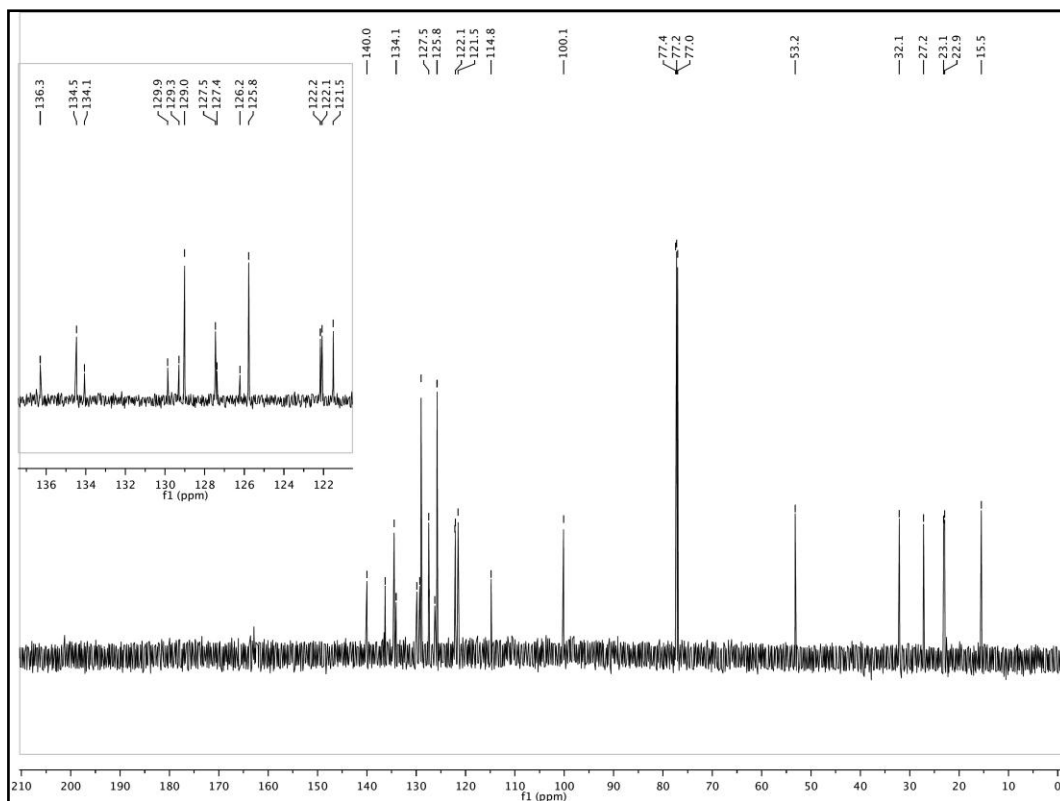

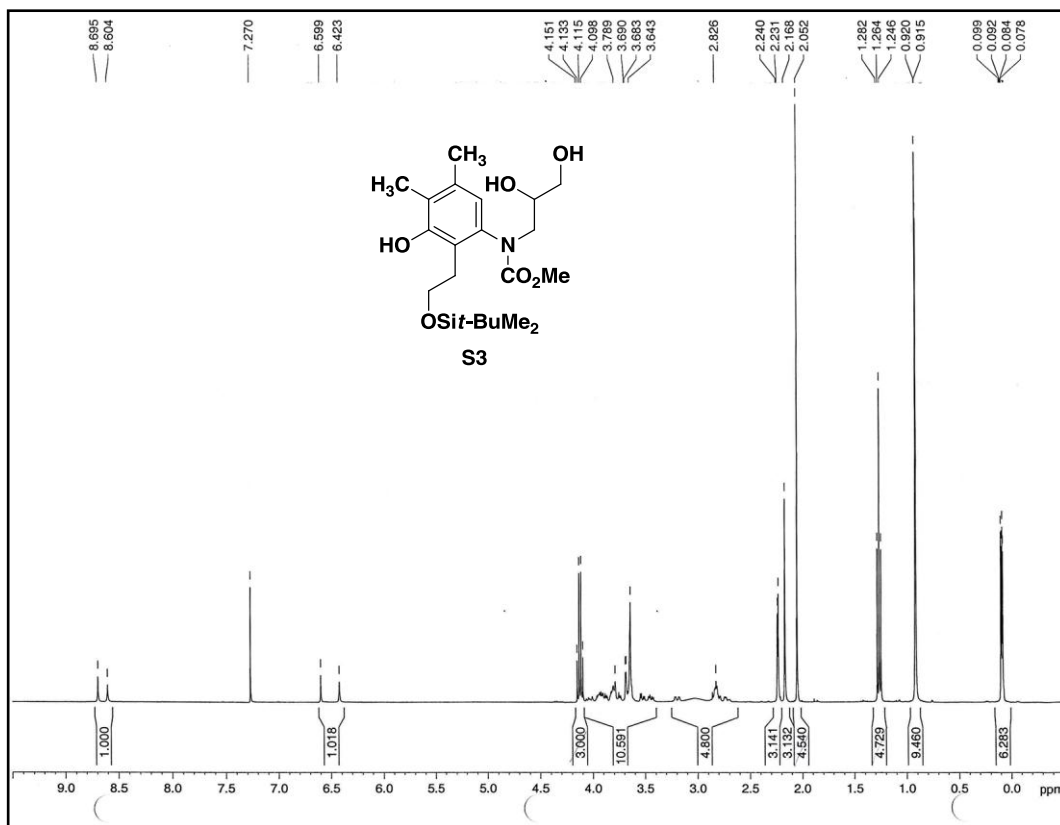

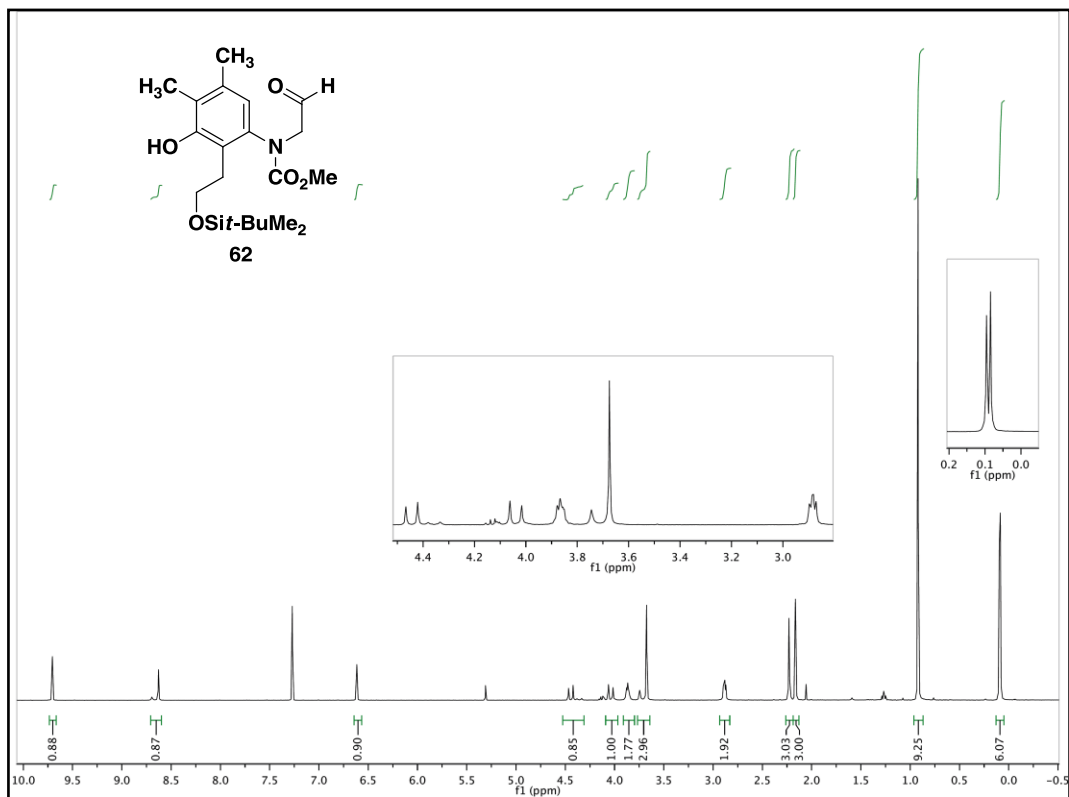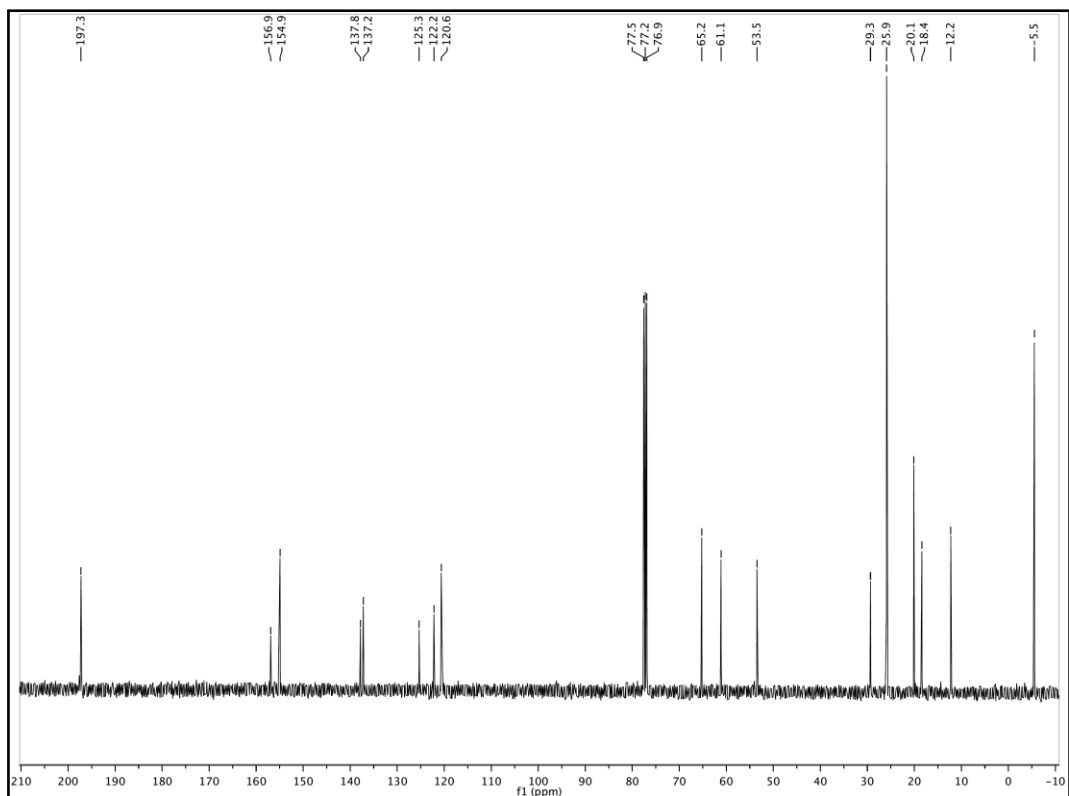

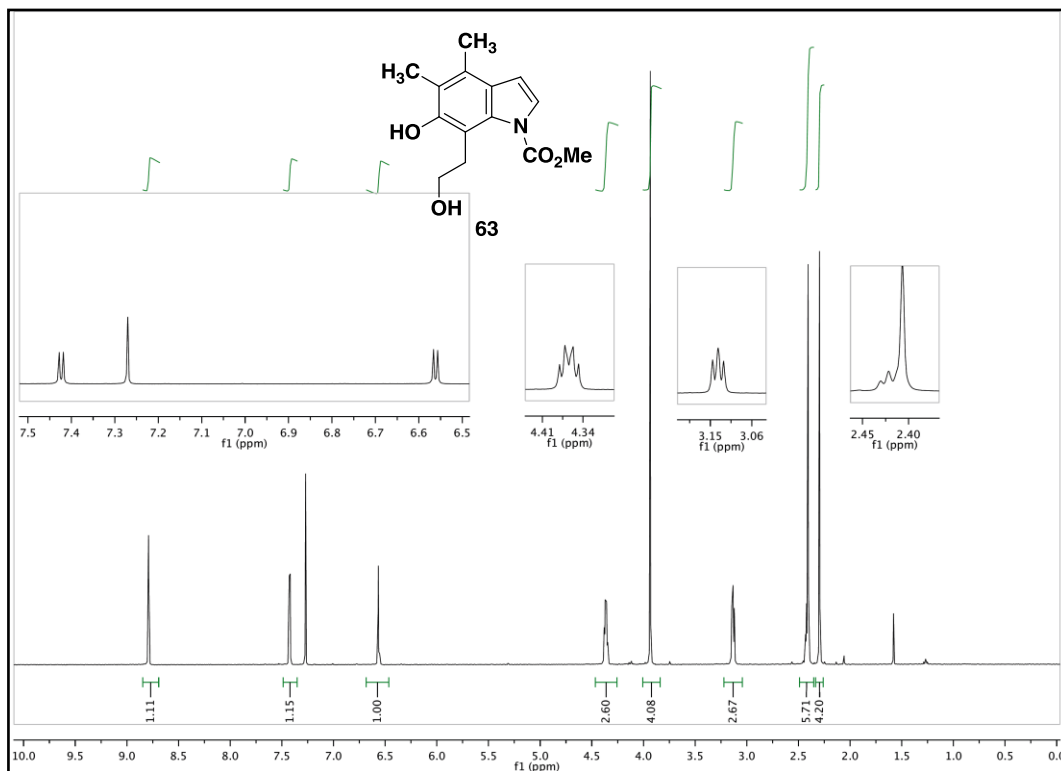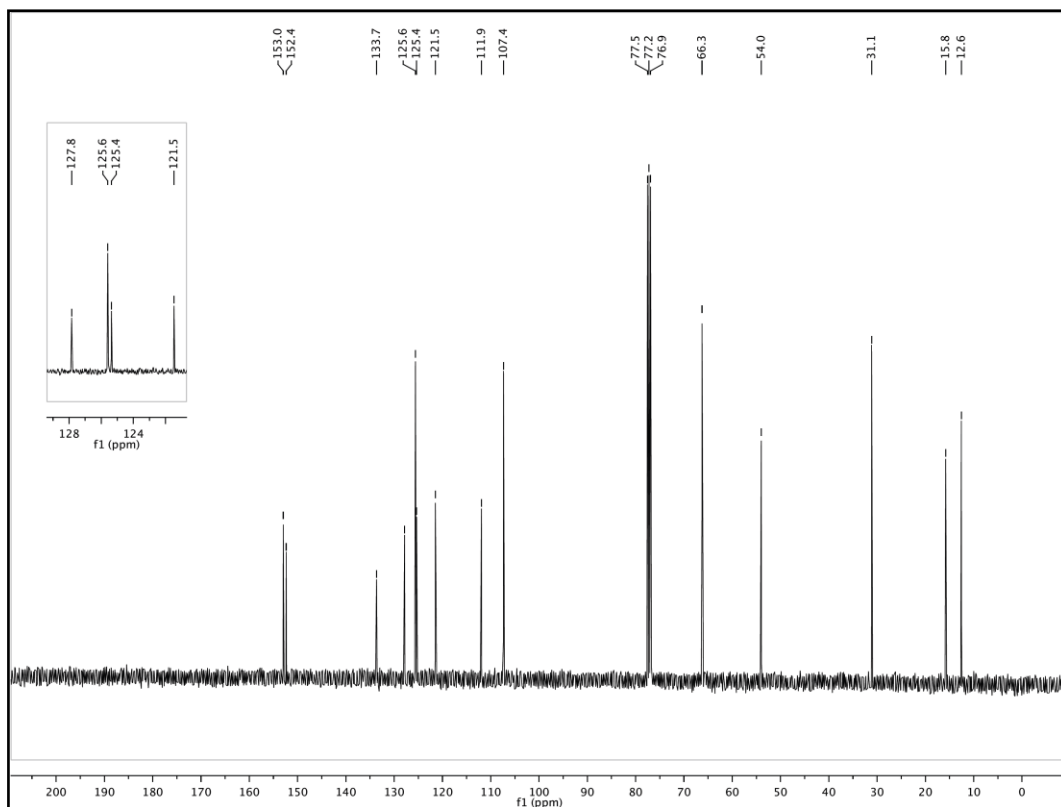

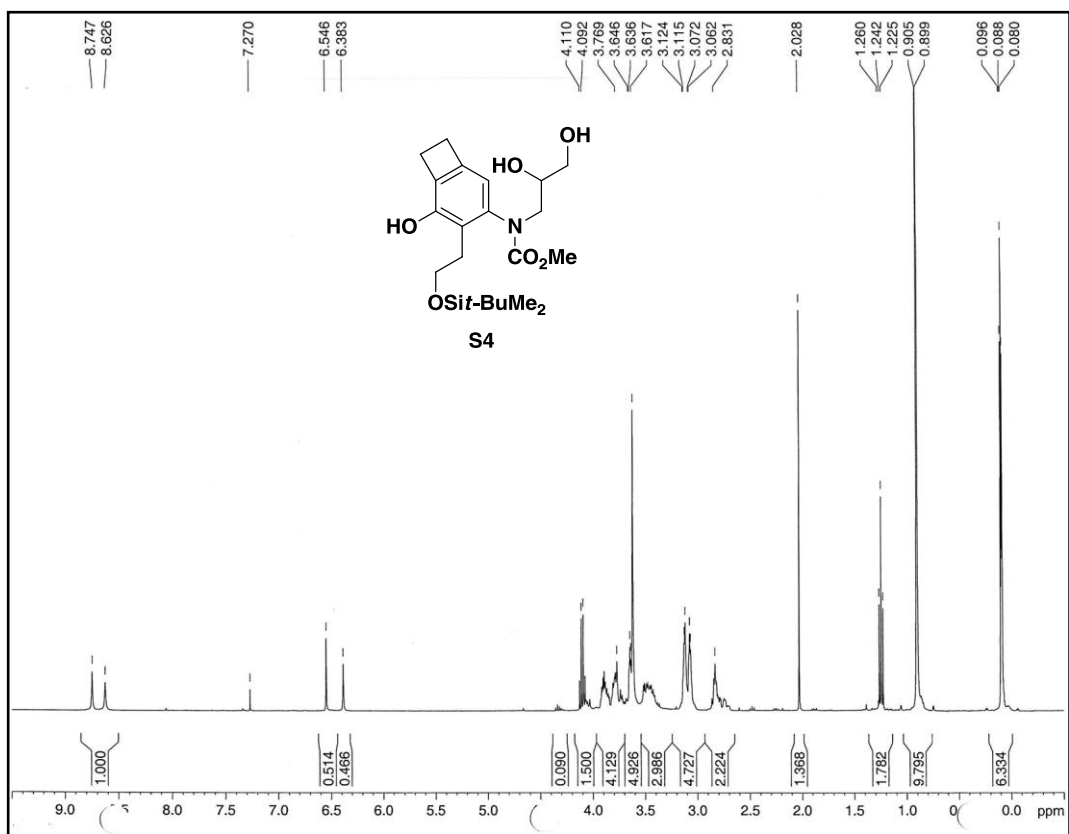



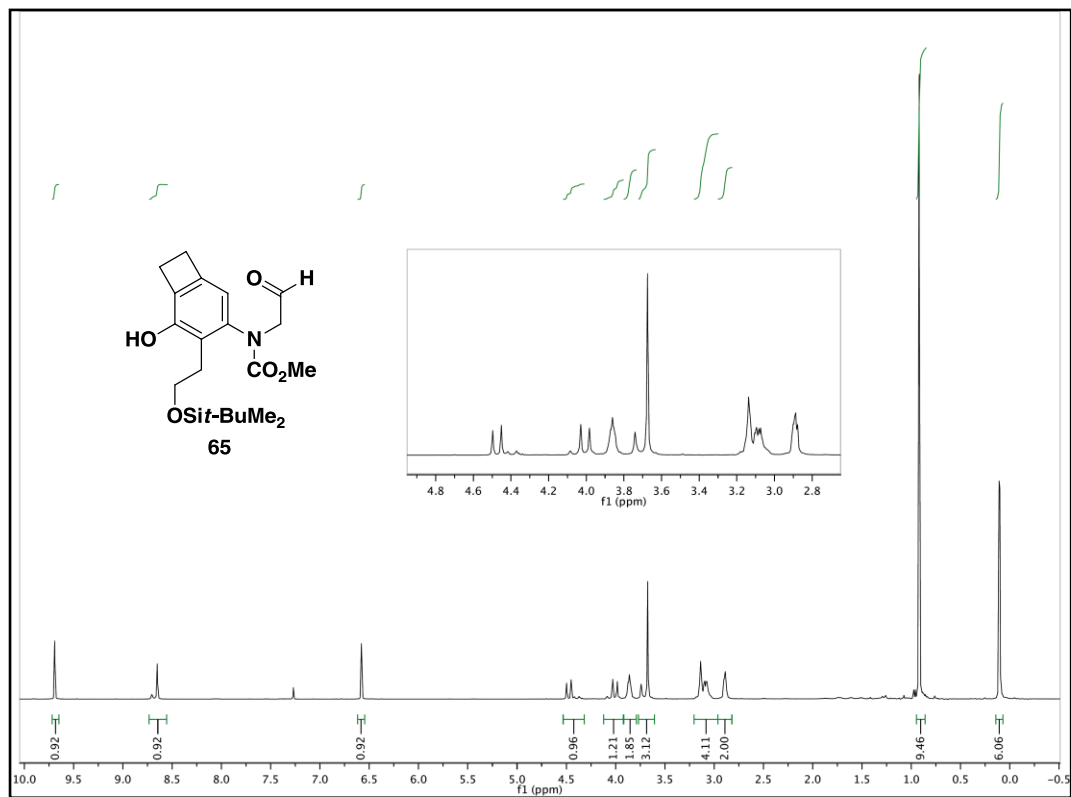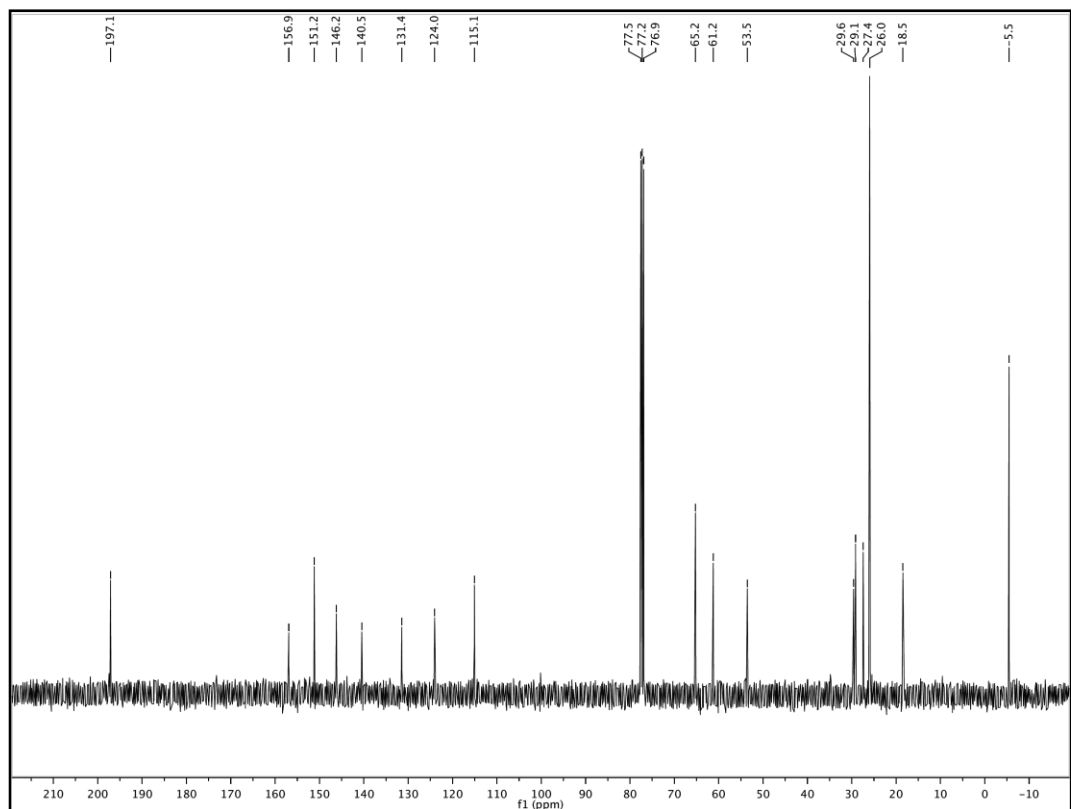

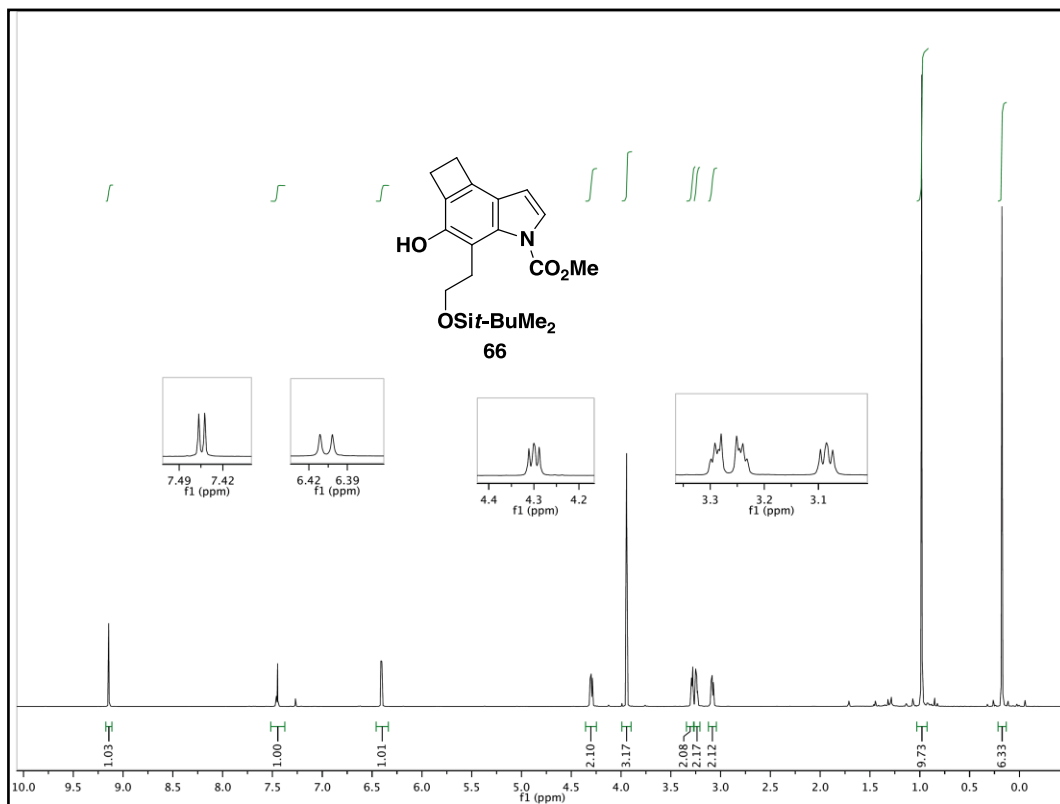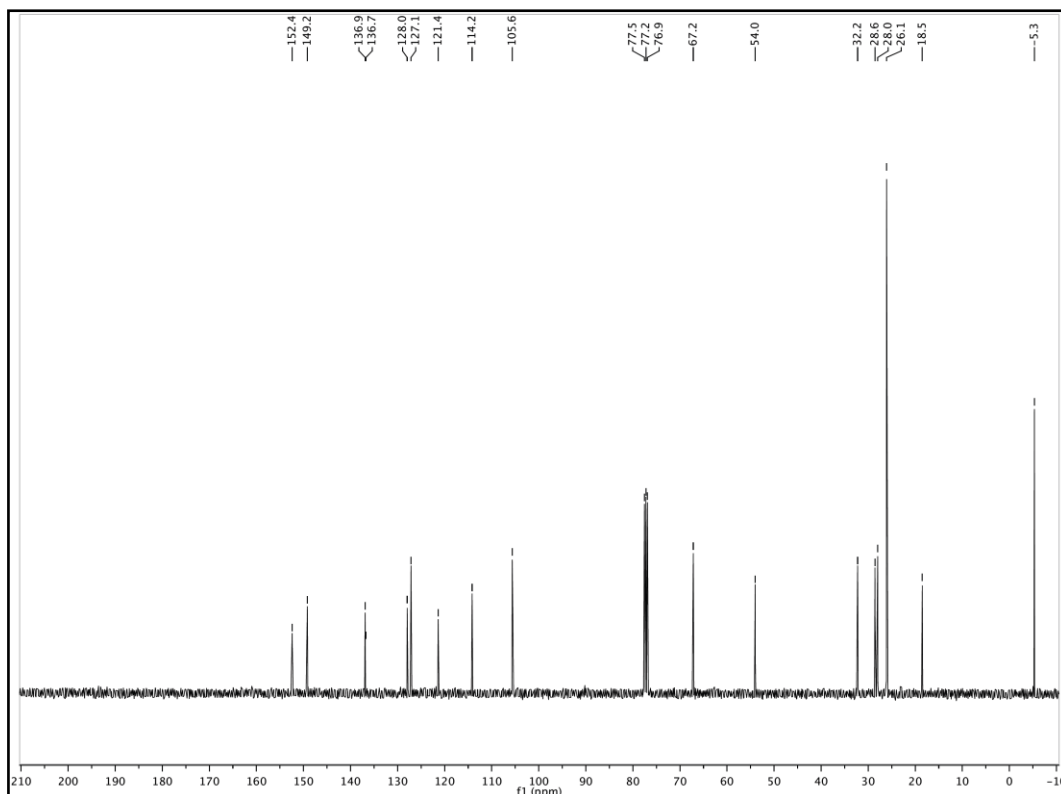

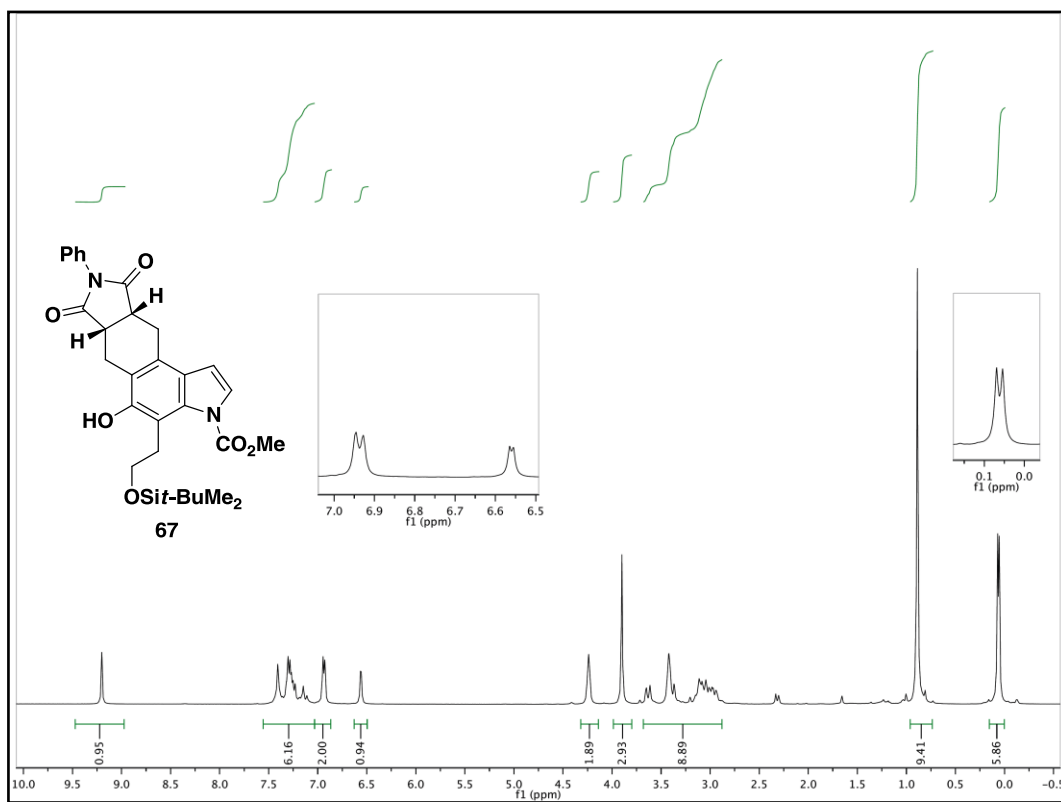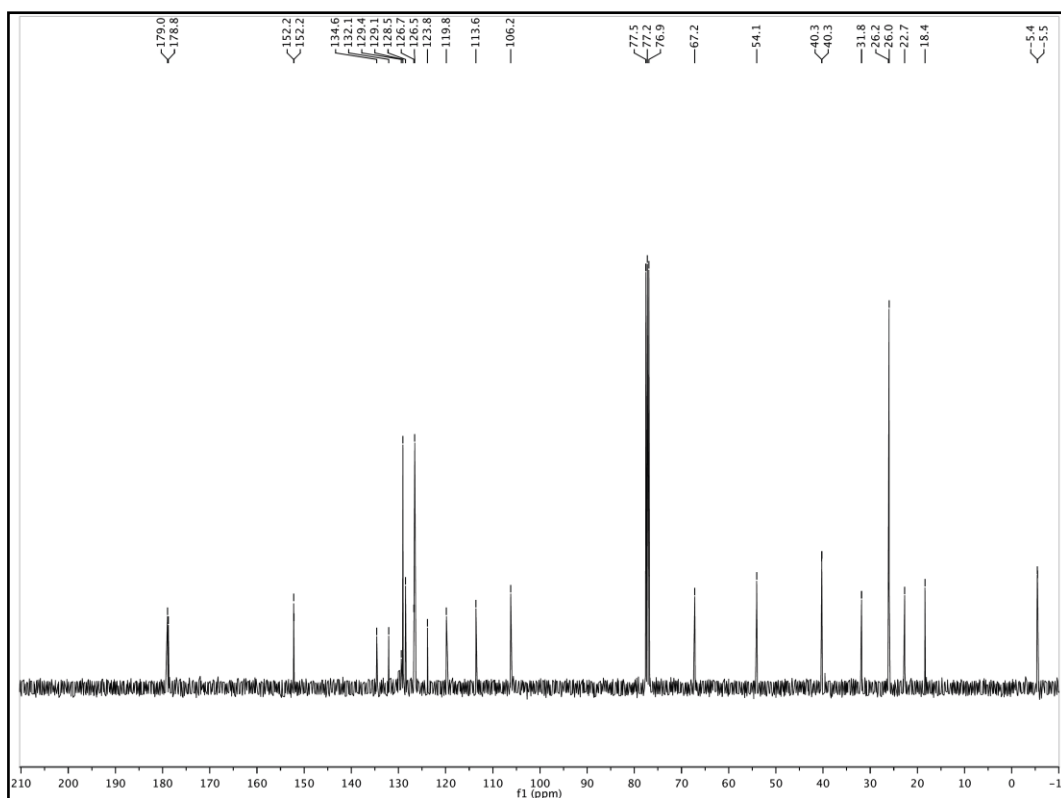

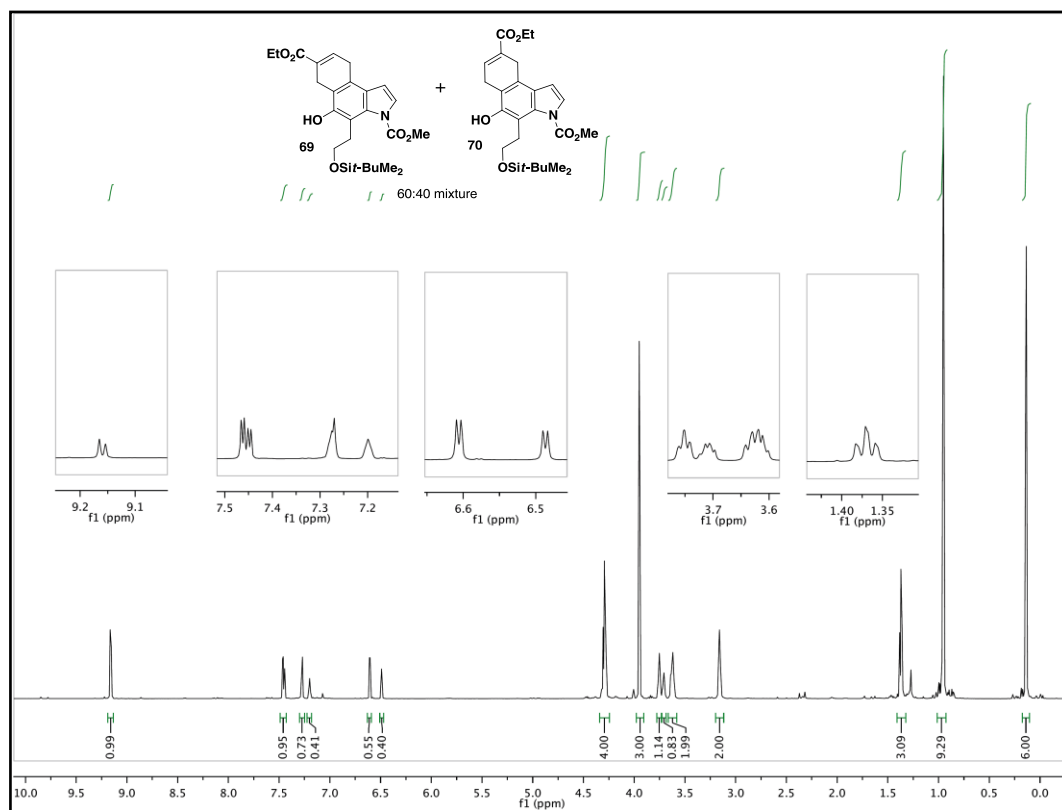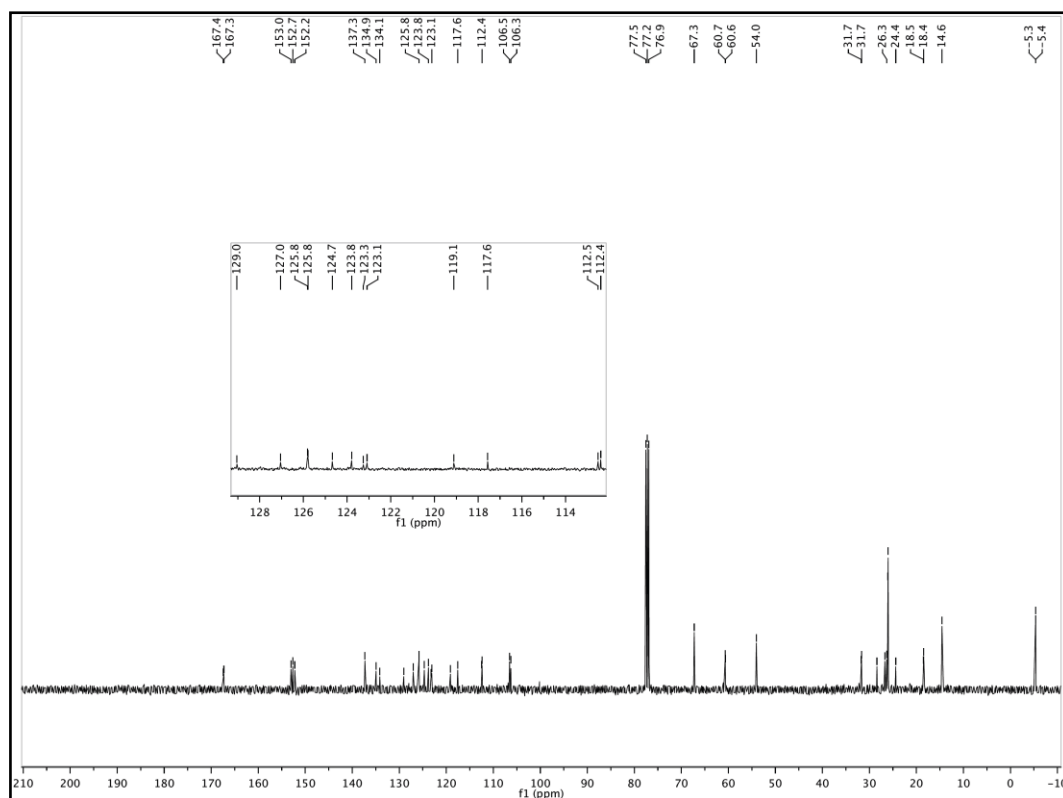

Supplement: NIHMS532592-supplement-1_si_001.pdf [file NIHMS532592-supplement-1_si_001.pdf]
